1 Functional spreading of hyperexcitability induced by human and  
2 synthetic intracellular A $\beta$  oligomers

3 Eduardo J. Fernandez-Perez<sup>1,\*</sup>, Braulio Muñoz<sup>1</sup>, Denisse A. Bascuñan<sup>1</sup>, Christian Peters<sup>1</sup>, Nicolas  
4 O. Riffo-Lepe<sup>1</sup>, Maria P. Espinoza<sup>1</sup>, Peter J. Morgan<sup>2</sup>, Caroline Filippi<sup>2</sup>, Romain Bourbonlou<sup>2</sup>, Urmi  
5 Sengupta<sup>3,4</sup>, Rakez Kayed<sup>3,4</sup>, Jérôme Epsztein<sup>2</sup>, Luis G. Aguayo<sup>1,\*</sup>.

6 <sup>1</sup> Laboratory of Neurophysiology, Department of Physiology, Universidad de Concepción, Barrio  
7 Universitario s/n P. O. Box 160-C, Concepción, Chile. Fernandez-Pérez EJ email:  
8 [edfernandez@udec.cl](mailto:edfernandez@udec.cl), Muñoz B email: [brauliomunoz@udec.cl](mailto:brauliomunoz@udec.cl), Bascuñan Muñoz DA email:  
9 [denisse.bascunan.m@gmail.com](mailto:denisse.bascunan.m@gmail.com), Peters C email: [cpeters@udec.cl](mailto:cpeters@udec.cl), Espinoza MP email:  
10 [marespinozam@udec.cl](mailto:marespinozam@udec.cl), Riffo Lepe NO email: [nriffo@udec.cl](mailto:nriffo@udec.cl)

11 <sup>2</sup> Institute of Neurobiology of the Mediterranean Sea (INMED), BP13 - 13273 Marseille cedex 09 -  
12 France. Morgan P email: [peter.morgan@inserm.fr](mailto:peter.morgan@inserm.fr), Filippi C email: [caroline.filippi@inserm.fr](mailto:caroline.filippi@inserm.fr),  
13 Bourbonlou R email: [romain.bourboulou@inserm.fr](mailto:romain.bourboulou@inserm.fr), Epsztein J email: [jerome.epsztein@inserm.fr](mailto:jerome.epsztein@inserm.fr)

14 <sup>3</sup> Mitchell Center for Neurodegenerative Diseases, University of Texas Medical Branch, Galveston,  
15 TX, USA. <sup>4</sup> Department of Neurology, Neuroscience and Cell Biology, University of Texas Medical  
16 Branch, Galveston, 77555 TX, USA. Sengupta U email: [ursengup@utmb.edu](mailto:ursengup@utmb.edu), Kayed R email:  
17 [rakayed@utmb.edu](mailto:rakayed@utmb.edu)

18 \*To whom correspondence should be addressed:

19 Eduardo J. Fernandez-Perez, PhD and Luis G. Aguayo, PhD, Department of Physiology,  
20 Universidad de Concepción, P. O. Box 160-C, Concepción, Chile. Tel.: 56-41-203380; Fax: 56-41-  
21 245975; email: [edfernandez@udec.cl](mailto:edfernandez@udec.cl) and [laguayo@udec.cl](mailto:laguayo@udec.cl)

22 **Keywords:**

23 AMPA-R / functional spreading / hyperexcitability / Intracellular A $\beta$  / nitric oxide.

24 **Abstract**

25 **Background**

26 Intracellular amyloid-beta oligomers (iA $\beta$ o) accumulation and neuronal hyperexcitability are  
27 two crucial events at early stages of Alzheimer's disease (AD). However, to date, no mechanism  
28 linking them has been reported.

29 **Methods**

30 Here, the effects of human AD brain-derived (h-iA $\beta$ o) and synthetic (iA $\beta$ o) peptides on synaptic  
31 currents and action potential (AP) firing were investigated in hippocampal neurons *in vitro*, *ex vivo*  
32 and *in vivo*.

33 **Results**

34 Starting from 500 pM, iA $\beta$ o rapidly increased the frequency of synaptic currents and higher  
35 concentrations potentiated the AMPA receptor-mediated current. Both effects were PKC-  
36 dependent. Parallel recordings of synaptic currents and nitric oxide (NO)-related fluorescence  
37 changes indicated that the increased frequency, related to pre-synaptic release, was dependent  
38 on a NO-mediated retrograde signaling. Moreover, increased synchronization in NO production  
39 was also observed in neurons neighboring those dialyzed with iA $\beta$ o, indicating that iA $\beta$ o can  
40 increase network excitability at a distance. Current-clamp recordings suggested that iA $\beta$ o  
41 increased neuronal excitability via AMPA-driven synaptic activity without altering membrane  
42 intrinsic properties.

43 **Conclusion**

44 These results strongly indicate that iA $\beta$ o causes functional spreading of hyperexcitability through a  
45 synaptic-driven mechanism and offer an important neuropathological significance to intracellular  
46 species in the initial stages of AD, which include brain hyperexcitability and seizures.

## 47 1. Background

48 Numerous studies have reported that amyloid beta (A $\beta$ ) plays an important role in the  
49 synaptic dysfunction observed in Alzheimer's disease (AD) patients [1,2]. Unfortunately, current  
50 therapeutic targets are focused on extracellular A $\beta$  accumulation at a stage when the disease is  
51 well underway. However, there might be previous events in the pathology that are more important  
52 in the early pre-clinical stages, thus, other mechanisms for the pathogenesis of AD need to be  
53 considered. For example, it was recently reported that prior to the formation of extracellular A $\beta$   
54 deposits and intracellular tau tangles in the human brain, there is an intracellular accumulation of  
55 A $\beta$  oligomers (iA $\beta$ o) during AD, especially in vulnerable regions such as the entorhinal cortex and  
56 hippocampus [3]. Moreover, it has been suggested that amyloid plaques can result from iA $\beta$ o  
57 accumulation, indicating that extracellular deposits are not the exclusive origin of senile plaques  
58 [4], thus highlighting the importance of iA $\beta$ o as an early stage in the progression of the pathology.  
59 The presence of iA $\beta$ o has also been associated with synaptic dysfunction in different AD mice  
60 models, which could play a key role in the cognitive deficit observed in this disease. For example,  
61 the 3xTg AD model develops intraneuronal accumulation of A $\beta$  between 3 and 4 months of age [5],  
62 a time when cognitive deficits are first detected and a stage with little, if any, presence of  
63 extracellular A $\beta$  [6]. Interestingly, the removal of iA $\beta$ o with immunotherapy improves cognition in  
64 this model [6], and as the pathology reemerges, there is a reappearance of intraneuronal A $\beta$   
65 followed by the formation of extracellular amyloid plaques [7]. Thus, growing evidence supports  
66 intraneuronal accumulation of A $\beta$  as an early event in the course of the pathology, and there are  
67 studies in at least 7 other murine AD models (including 5xFAD, APP/tau, APP751SL/PS1 KI,  
68 APPE693 $\Delta$  and TBA2) [8–10] that also show the presence of intraneuronal A $\beta$  prior to extracellular  
69 accumulation, independent of the mutation they carry.

70 Early intracellular A $\beta$  accumulation is particularly interesting since recent evidence has  
71 shown that changes in neuronal excitability could also be playing a fundamental role in the initial  
72 stages of A $\beta$  pathology, predisposing the development of a synaptopathy postulated in the initial  
73 stages of AD. For example, subjects diagnosed in the early stages of prodromal AD (a very early

74 form of AD) displayed increased neuronal activity in the hippocampus and cortex [11,12].  
75 Additionally, it was found that patients might exhibit increased neuronal excitability and even  
76 present a higher risk of seizures [13–15]. Indeed, two independent studies demonstrated that  
77 seizures were present in ~10-20% of patients diagnosed with sporadic AD [16,17], and patients  
78 with familial AD with mutations in APP, PS1 and PS2 also exhibited an increased prevalence of  
79 seizures [18–20]. Moreover, these early changes in excitability in human AD brains are in  
80 agreement with *in vitro* studies that showed epileptiform activity [21] and hyper-synchronous  
81 neuronal activity following acute exposure to extracellular A $\beta$ , as well as *in vivo* models that exhibit  
82 altered intrinsic excitability [22–24] and convulsive neuronal activity [23,25]. The nature of this  
83 hyperexcitability is currently unknown.

84         Since intraneuronal accumulation is an early event in the pathology, these studies suggest  
85 a potential link between iA $\beta$ o and neuronal hyperexcitability. However, a potential cellular  
86 mechanism that might explain this potential association has not been reported. Here, we describe  
87 that h-iA $\beta$ o and iA $\beta$ o applied to the postsynaptic neuron increased global synaptic transmission,  
88 excitability, and neuronal synchronization in different *in vitro* and *in vivo* hippocampal models. The  
89 presynaptic action of iA $\beta$ o was primarily caused by a NO-dependent retrograde signaling, while the  
90 postsynaptic effect was mediated by the potentiation in AMPA currents by a PKC-dependent  
91 mechanism.

92

93

94

95

96

97

98 **2. Methods**

99 Detailed description of the applied methods are provided in Additional file 1: Supplementary  
100 methods

101 **2.1. Primary cultures of rat hippocampal neurons.** Hippocampal neurons were obtained  
102 from 18-day embryos from pregnant Sprague-Dawley rats and cultured for 10-14 days *in vitro* (DIV)  
103 as previously described [94].

104

105 **2.2. Preparation of amyloid beta oligomers.** Human A $\beta$ 42 fluorescently labeled with FAM (5  
106 (6) – Carboxyfluorescein) at the N-terminal or without fluorescence were bought from Biomatic  
107 (USA) and Genemed Synthesis Inc. (USA), respectively. Synthetic oligomeric species of A $\beta$  (later  
108 referred as iA $\beta$ ) were prepared as previously described [95]. See details in Additional file 1:  
109 Supplementary methods, section 1.1.

110

111 **2.3. Obtaining human-derived A $\beta$ .** Oligomeric assemblies of A $\beta$  were derived from AD brain  
112 tissues (later referred as h-iA $\beta$ ) by following previously published protocol [96]. A $\beta$  was extracted  
113 from the PBS-soluble fraction of AD brain homogenate using co-Immunoprecipitation Kit  
114 (ThermoFisher Scientific, USA) following manufacturer's guidelines. Briefly, amine-reactive resin  
115 was coupled with anti-A $\beta$  6E10 antibody (BioLegend, USA) followed by incubation with PBS-  
116 soluble fraction of AD brain homogenate. Bound proteins were eluted in 0.1 M glycine (pH 2.8),  
117 and the final pH was adjusted to 7.0 by adding 1 M Tris-HCl (pH 8). Eluted fraction was subjected  
118 to buffer exchange and collected in sterile PBS. This fraction was further separated by size  
119 exclusion chromatography using AKTA Explorer system fitted with a Superdex 200 Increase 10/300  
120 GL Column. Degassed PBS was used as mobile phase with a flowrate of 0.5 mL/min to collect the  
121 A $\beta$  fraction. The total protein concentration was measured with bicinchoninic acid protein assay  
122 (Pierce™ Micro BCA Kit, ThermoFisher Scientific, USA). Human brain-derived A $\beta$  was  
123 characterized by Western blot analysis and atomic force microscopy (details in Additional file 1:  
124 Supplementary methods, section 1.2 and 1.3).

125 **2.4. Electrophysiology.** Whole cell recordings were used to simultaneously apply A $\beta$  peptide  
126 intracellularly through the internal solution contained in the recording electrode and record post-  
127 synaptic currents at constant voltage (voltage-clamp) or action potentials (current-clamp) *in vitro*,  
128 *ex vivo* and/or *in vivo*.

129

130 **2.4.1. Voltage-clamp experiments *in vitro* and *ex vivo*.** For *in vitro* experiments, the dish  
131 culture medium was replaced with a normal external solution (NES) containing (in mM): 150 NaCl,  
132 5.4 KCl, 2.0 CaCl<sub>2</sub>, 1.0 MgCl<sub>2</sub>, 10 glucose and 10 HEPES (pH 7.4 adjusted with NaOH, 310 mOsm  
133 / L). Cells were stabilized at room temperature for 20 minutes before beginning the experiments.  
134 Unless otherwise noted, the internal solution used to record voltage-clamp experiments, including  
135 synaptic currents or ligand-evoked currents, contained (in mM): 120 KCl, 2.0 MgCl<sub>2</sub>, 2 Na<sub>2</sub>ATP,  
136 10 BAPTA, 0.5 NaGTP and 10 HEPES (pH 7.4 adjusted with KOH, 290 mOsm / L). To study  
137 miniature post-synaptic currents (mPSCs), 500 nM tetrodotoxin (TTX) (Alomone Labs, Israel) was  
138 applied in the NES of the well containing the cells (details in Additional file 1: Supplementary  
139 methods, section 1.5). For the AMPAergic evoked (eEPSCs) and GABAergic (eIPSCs) currents,  
140 500 nM of TTX was used in the recording solution, and using a gravity-driven perfusion system (2-  
141 3 ml/min), 100  $\mu$ M of extracellular AMPA and GABA were applied, respectively. All currents  
142 (synaptic and evoked) were recorded in voltage-clamp mode by adjusting the membrane potential  
143 to -60 mV (unless otherwise noted). Voltage-clamp *in vitro* experiments were performed using an  
144 Axopatch-200B amplifier (Molecular Devices, USA) and an inverted microscope (Nikon Eclipse  
145 TE200-U, Japan). The acquisition was made using a computer connected to the registration system  
146 using a Digidata 1440A acquisition card (Molecular Devices, USA) and the pClamp10 software  
147 (Molecular Devices, USA). Electrodes with a resistance of 4-5 M $\Omega$  were pulled from borosilicate  
148 capillaries (WPI, USA) in a horizontal puller (P1000, Sutter Instruments, USA). Some voltage-clamp  
149 experiments were performed using the following internal solution (in mM): 114 K-Gluconate, 4 KCl,  
150 4 MgCl<sub>2</sub>, 10 BAPTA and 10 HEPES (pH 7.4 adjusted with KOH, 290 mOsm / L). This was later  
151 referred as "*low Cl<sup>-</sup> internal solution*". Details of voltage-clamp *ex vivo* experiments in Additional file  
152 1: Supplementary methods, section 1.5.

153

154 **2.4.2. Current-clamp experiments *in vitro*.** To study the membrane potential ( $V_m$ ) recordings  
155 were made in current-clamp mode as previously described [97], using the previously mentioned  
156 *low Cl<sup>-</sup> internal solution*. To evoke action potentials, a family of current pulses applied for 300 ms  
157 was used (from -300 pA to +275 pA, increasing by 25 pA steps). In some experiments, the voltage-  
158 dependent sodium channel intracellular inhibitor (QX-314) (Tocris, USA) was used. Before starting  
159 the recording of evoked action potentials, a small holding current (-2 to -50 pA) was applied to  
160 stabilize the resting membrane potential (RMP) to -70 mV. Current-clamp *in vitro* experiments were  
161 performed using an Axopatch-200B amplifier (Molecular Devices, USA) and an inverted  
162 microscope (Nikon Eclipse TE200-U, Japan).

163

164 **2.4.3. Current-clamp recordings *in vivo*.** All experiments on live animals were approved by the  
165 Institut National de la Santé et de la Recherche Médicale (INSERM) Animal Care and Use  
166 Committee, in accordance with the guidelines of the European Community Council directives  
167 (2010/63/EU). Data were obtained from male Wistar rats between the ages of postnatal day 25  
168 (P25) to P35 (weight range, 90-110 g). Recordings were made as previously described [98]. See  
169 details in Additional file 1: Supplementary methods, section 1.6.

170

171 **2.5. Histology.** At the end of the recording period and to confirm the location and the  
172 morphology of *in vivo* recorded neurons, we performed immunohistochemical analysis of  
173 hippocampus sections. See details in Additional file 1: Supplementary methods, section 1.7.

174

175 **2.6. Simultaneous recordings of electrophysiology and fluorescence.** Simultaneous  
176 studies were performed using the same methodology described for the recording of synaptic  
177 currents in voltage-clamp mode *in vitro* (section 2.4.1) together with NO fluorescence using a  
178 previously described methodology [99]. See details in Additional file 1: Supplementary methods,  
179 section 1.8.

180

181 **2.7. Data analysis.** All data obtained from all parameters were plotted using OriginPro2019b  
182 (Origin Lab, USA). Data are shown as mean  $\pm$  SEM for normally distributed populations and as  
183 median and interquartile ranges (IQR) for non-normally distributed populations. Statistical analyses  
184 were performed using the two-tailed unpaired Student's t-tests ( $\alpha=0.05$ ) or the two-tailed Mann-  
185 Whitney U-test ( $\alpha=0.05$ ) as appropriate, after testing for normality with Shapiro-Wilk test (for  $n<50$ )  
186 or Kolmogorov-Smirnov (for  $n>50$ ) and for homogeneity of variances with Levene's test. Data with  
187 more than two groups or factors were analyzed by two-way ANOVA test ( $\alpha=0.05$ ). One-way  
188 ANOVA test was used to compare several populations of neurons, followed by Tukey or Welch's  
189 ANOVA with Games-Howell post-hoc test to correct for variance heterogeneity using R software  
190 [100] ([www.r-project.com](http://www.r-project.com)). A probability level ( $p$ )  $< 0.05$  was considered statistically significant (\*  $p$   
191  $< 0.05$ , \*\*  $p < 0.01$ , \*\*\*  $p < 0.001$ ). Unless otherwise noted, all "n" values represent recorded cells  
192 (see details of parameter calculations in Additional file 1: Supplementary methods, section 1.9).

193

194

195

196

197

198

199

200

201



## 202 3. Results

### 203 Rapid effect of human derived iA $\beta$ o in hippocampal neuronal activity

204 We examined the synaptic effects of human AD-brain derived intracellular oligomers (h-  
205 iA $\beta$ o) using an electrophysiological approach. First, characterization of the biochemically purified  
206 A $\beta$  species with WB analysis using A11 (anti-amyloid oligomers) and 6E10 (generic anti-A $\beta$ )  
207 antibodies confirmed the presence of A $\beta$ o in this preparation (Fig. 1a) and AFM imaging showed a  
208 homogeneously distributed population of sphere shaped oligomers ranging from 5-20 nm in size  
209 (Fig. 1b). Using a patch electrode, we delivered increasing concentrations (0, 50 and 1000 nM) of  
210 h-iA $\beta$ o while recording post-synaptic currents in primary hippocampal neurons (see scheme in Fig.  
211 1c). Control synaptic current recordings were made with an intracellular solution without h-iA $\beta$ o.  
212 Electrophysiological recordings showed the presence of spontaneous synaptic events (Fig. 1d,  
213 arrows in blue) that had a stable response over a period of 10 minutes. Applying a low concentration  
214 of h-iA $\beta$ o with the patch electrode (50 nM) augmented the presence of bursts of spontaneous  
215 synaptic currents interspersed in the recording (Fig. 1d, arrowheads in middle trace). It is also  
216 possible to observe that part of the total activity is mediated by spikes in current recording mode,  
217 which also augmented with the presence of 50 nM h-iA $\beta$ o (Fig. 1d, arrows in middle trace). The  
218 increase in activity was a concentration-dependent phenomenon, given that there were more bursts  
219 of synaptic activity and events of greater amplitude as the concentration of iA $\beta$ o augmented from  
220 50 to 1000 nM. We integrated the area under the current trace for each condition and computed  
221 the charge transferred for the recorded cell (see calculation details in Additional file 1:  
222 Supplementary methods, section 1.9). 1000 nM h-iA $\beta$ o increased significantly the charge  
223 transferred meaning that more current by unit of time was flowing through the membrane compared  
224 to control conditions (Fig. 1e). Interestingly, 50 and 1000 nM produced an increase in the frequency  
225 of the recorded events (Fig. 1f), but only 1000 nM augmented the amplitude (Fig. 1g). To confirm  
226 the time course of these results and to validate the method as an approximation to effectively deliver  
227 A $\beta$ o to the intraneuronal compartment, we repeated this experiment using a fluorescently labeled  
228 synthetic A $\beta$ o. The results show that A $\beta$ o in the patch pipette is rapidly delivered to the

229 intraneuronal compartment, since the increase in synaptic activity was correlated with a temporal  
230 increase in fluorescence, with a  $t_{1/2}$  of 29 s (Additional file 1: Supplementary Figure 1).

### 231 **Concentration-dependent increase of miniature currents by iA $\beta$ o**

232 It is accepted that in order to record synaptic currents at the postsynaptic site, a release of  
233 neurotransmitters must occur from the pre-synaptic terminal (Fig. 1c). To quantify the effect of iA $\beta$ o  
234 on actual synaptic transmission, we recorded miniature post-synaptic currents (mPSCs).  
235 Intracellular application of 500 nM of h-iA $\beta$ o was able to produce a rapid and significant increase  
236 in the frequency and amplitude of mPSCs (Fig. 2a - c). This result was confirmed using different  
237 concentrations of synthetic iA $\beta$ o, that compared with control condition, exhibited a significant  
238 increase in the number of events as the concentrations was raised, indicating a concentration-  
239 dependent effect (Fig. 2d). The effects of iA $\beta$ o were more evident on the frequency of miniature  
240 events since statistically significant differences were already found at 0.5 nM of iA $\beta$ o when  
241 compared to control conditions (Fig. 2e). On the other hand, the effect of iA $\beta$ o on the amplitude  
242 was only significant at a much higher concentration (Fig. 2f, 1000 nM). We wanted to perform some  
243 additional experimental controls to evaluate potential confounds with the application of intracellular  
244 iA $\beta$ o. Therefore, we applied reverse sequence A $\beta$ o, as well as the vehicle used to dissolve the  
245 peptide. Under these conditions, no significant differences in frequency with respect to the control  
246 condition were found (Additional file 1: Supplementary Figure 2). Furthermore, we wanted to control  
247 whether the osmolarity of the internal solution was affected by adding different iA $\beta$ o concentrations,  
248 but no significant changes were found (Additional file 1: Supplementary Figure 2). Finally, we  
249 applied iA $\beta$ o in the absence and presence of a specific antibody (A11) that recognizes oligomeric  
250 forms [26] and found that it significantly attenuated its toxicity (Additional file 1: Supplementary  
251 Figure 3).

### 252 **Human-iA $\beta$ o affects excitatory/inhibitory (E/I) balance *in vitro***

253 A great body of evidence indicates that A $\beta$  disrupts excitatory neurotransmission in  
254 different AD mice models [27–30] thereby affecting E/I balance [31]. Since our previous results

255 showed an increase in  $iA\beta_o$ -mediated neurotransmission and augmented spike number in current  
256 recording mode, we examined whether h- $iA\beta_o$  could specifically affect glutamatergic vs GABAergic  
257 neurotransmission and thereby changing the E/I balance in hippocampal neurons. For this, we  
258 performed voltage-clamp experiments using a low  $Cl^-$  internal solution (see details in section 2.4.1).  
259 This allowed us to record EPSC and IPSC separately by changing the membrane holding potential.  
260 The results showed that h- $iA\beta_o$  markedly increased the spontaneous excitatory post-synaptic  
261 currents (sEPSC) (Fig. 3a, bottom, right trace), but not the inhibitory post-synaptic currents (sIPSC).  
262 The data also shows that charge transferred for sEPSC, but not sIPSC, was significantly increased  
263 by h- $iA\beta_o$  (Fig. 3b, black bar). Consequently, the E/I balance obtained analyzing charge transferred  
264 was highly and rapidly increased by h- $iA\beta_o$  (Fig. 3b, white bar). Since sEPSC are mainly mediated  
265 by AMPA receptors in the current experimental conditions, our results suggest that the alteration  
266 in AMPA-mediated neurotransmission underlies this excitatory input disruption.

#### 267 **Differential effects of $iA\beta_o$ on isolated excitatory AMPA and inhibitory GABA<sub>A</sub> currents.**

268 Subsequently, we studied pharmacologically isolated AMPAergic and GABAergic  
269 miniature synaptic currents (2 of the predominant neurotransmissions present in hippocampal  
270 neurons [32]) to confirm the selectivity of  $iA\beta_o$ . In the presence of  $iA\beta_o$ , there was a significant  
271 increase in the frequency of AMPA mEPSCs and GABAergic mIPSCs (Fig. 4a and c). On the other  
272 hand, only the amplitude of AMPA was affected by  $iA\beta_o$ , as clearly seen by the average synaptic  
273 event (Fig. 4b). The quantification of these parameters (frequency and amplitude) were plotted to  
274 assess the  $iA\beta_o$  effects on both types of neurotransmission (Fig. 4e and f). We also performed  
275 voltage-clamp recordings in the stratum pyramidale of the CA1 area (SP-CA1) in hippocampal  
276 slices of an adult mouse (*ex vivo*) and found similar results (Additional file 1: Supplementary Figure  
277 4). Because the AMPAergic mediated-neurotransmission was more significantly affected, we  
278 examined AMPAergic currents in presence of h- $iA\beta_o$  and confirmed that human-derived oligomers  
279 also produced the increase in excitatory synaptic transmission (Additional file 1: Supplementary  
280 Figure 5). The experimental observation that the amplitude was affected for AMPA receptors (with  
281 human-derived and synthetic preparations) was also confirmed by evaluating ligand-evoked

282 currents in hippocampal neurons. The results showed that the presence of  $iA\beta_o$  enhanced the  
283 AMPA-mediated current amplitude by about 2 times (Control I normalized:  $1.00 \pm 0.05$  vs.  $iA\beta_o$ :  
284  $1.95 \pm 0.23$ ) (Fig. 4g and i). Once again, this was a specific effect for the excitatory transmission  
285 since no effects were observed for GABA-evoked currents (Fig. 4h and i).

#### 286 **The effect of $iA\beta_o$ on AMPA neurotransmission depends on PKC**

287 These previous results prompted us to investigate in depth the mechanism(s) that could  
288 be mediating the effect of  $iA\beta_o$  on the AMPAergic excitatory transmission. It has been shown that  
289 phosphorylation of ionotropic channels plays a preponderant role in the regulation of synaptic  
290 function [33], and the intracellular perfusion of an atypical isoform of PKC denominated PKCM (a  
291 constitutively active form of PKC) increases the synaptic response mediated by the AMPA receptor  
292 in a similar way to what we previously observed in our recordings with  $iA\beta_o$  [34]. Taking into account  
293 the above, and considering that it is quite a rapid effect, we decided to record AMPA-R currents  
294 (miniature and ligand-evoked) in the presence of a PKC inhibitor (CLR, 2.5  $\mu$ M intracellularly). We  
295 found that the effect of  $iA\beta_o$  on the frequency and amplitude of the mEPSCs was diminished when  
296 co-applied together with CLR (Fig. 5a), as evidenced by quantifying both parameters for all  
297 experimental conditions tested with and without inhibitor application (Fig. 5b and c), clearly showing  
298 that the effect of  $iA\beta_o$  on AMPA mEPSCs was dependent on this kinase. On the other hand, AMPA  
299 evoked-currents also showed that  $iA\beta_o$  increased the current evoked by AMPA (Fig. 5d) in relation  
300 to control, but in the presence of the PKC-inhibitor a significant decrease occurred, reaching values  
301 similar to those of control where only CLR was applied (Fig. 5d). Quantification of the amplitude of  
302 the evoked EPSC showed a statistically significant increase in presence of  $iA\beta_o$  with respect to  
303 control conditions (Fig. 5e). This was interesting because it not only demonstrated that PKC was  
304 involved in the effect of  $iA\beta_o$  on the amplitude of mEPSCs and evoked EPSC (a post-synaptic  
305 effect), but also on the frequency of mEPSCs (pre-synaptic effect), suggesting that the global  
306 effects of  $iA\beta_o$  on the excitatory synapse through this kinase compromises the pre- and post-  
307 synaptic compartments.

308 **Increased NO-production in iA $\beta$ o-treated in recorded (RN) and the neighboring (NN) neurons**

309           The data showed that there was a potent effect on the frequency of mPSCs when iA $\beta$ o  
310 was applied to the postsynaptic neuron, suggesting an increase in the release of neurotransmitters  
311 at the pre-synaptic terminal [35]. Could it be that iA $\beta$ o applied to the postsynaptic neuron affects  
312 the release of neurotransmitter from the pre-synaptic neuron? If so, could there be a retrograde  
313 mechanism involved in the effect? [36]. Because the effect was rapid, we thought that it could be  
314 produced by nitric oxide (NO), a retrograde messenger, known to be involved in presynaptic  
315 neurotransmitter release [37–39] and produced by nitric oxide synthase (NOS). It is important to  
316 consider that low concentrations of iA $\beta$ o were used for all the recordings obtained in these  
317 experiments, which did not affect mPSCs amplitude, but only its frequency. Under these conditions,  
318 we decided to use a non-selective nitric oxide synthase inhibitor (L-NAME) together with the  
319 following methodological approach: mPSCs and relative NO levels using a fluorescent probe DAQ  
320 were simultaneously recorded (details in section 2.6 and in Additional file 1: Supplementary  
321 methods, section 1.8). In addition, not only the fluctuation of the relative levels of NO in the recorded  
322 cell (denoted as RN) (Fig. 6a) was quantified, but also of neighboring neurons (denoted as NN)  
323 (Fig. 6a). Pre-incubation of hippocampal neurons with L-NAME showed no significant differences  
324 in the frequency of miniature currents (Fig. 6b-d), but did significantly decrease the NO levels in  
325 RN (Fig. 6e) and in NN (Fig. 6g) when compared to control conditions. The statistical comparison  
326 was performed at the end of the recording period (20 min.) (Fig. 6e and g, indicated by the gray  
327 box) and plotted as a bar graph for RN (Fig. 6f) and NN (Fig 6h). For its part, iA $\beta$ o had the expected  
328 effect and increased the frequency of mPSCs (Fig. 6b-d). Interestingly, the increase in iA $\beta$ o-  
329 mediated miniature synaptic activity occurred at the same time that NO levels increased in the RN  
330 (Fig. 6e-f). More importantly, iA $\beta$ o not only increased the levels of NO in the RN, but also in NN  
331 that did not get iA $\beta$ o (Fig. 6g-h). Pre-incubation of the neuronal culture with L-NAME reduced the  
332 effect of iA $\beta$ o on mPSCs frequency by  $\approx$  51% (Fig. 6b-d). This decrease in the frequency of mPSCs  
333 correlated well with the decrease in the relative NO levels in the RN and NN (Fig. 6e-h, iA $\beta$ o + L-  
334 NAME). Additionally, this NO-dependent effect was confirmed by co-applying iA $\beta$ o together with a

335 donor molecule of NO (SNAP 300  $\mu$ M) causing a synergistic effect between the two, increasing the  
336 frequency of mPSCs in the RN (Additional file 1: Supplementary Figure 6), as well as in the relative  
337 levels of NO in both the RN and NN (Additional file 1: Supplementary Figure 6). The opposite effect  
338 was observed using  $iA\beta_o$  in the presence of the NO chelator C-PTIO (Additional file 1:  
339 Supplementary Figure 6). On the other hand, no changes in the effects of  $iA\beta_o$  in the frequency of  
340 mPSCs were found using a specific inhibitor of inducible NO (iNOS) (Additional file 1:  
341 Supplementary Figure 7).

#### 342 **$iA\beta_o$ increased the excitability of hippocampal neurons *in vivo* and *in vitro***

343 The results showed that the excitatory transmission and E/I balance are strongly affected  
344 by human and synthetic  $iA\beta_o$ . The CA1 area in the hippocampus (a major center of excitatory  
345 neurotransmission) is one of the first areas prone to develop early AD neuropathology in humans  
346 and mice models [40–44], therefore, we decided to record hippocampal CA1 pyramidal neurons  
347 using whole cell current-clamp recordings in an anesthetized *in vivo* rat model to examine neuronal  
348 excitability (Fig. 7a). We found that in the presence of  $iA\beta_o$ , the neuron begun spiking in response  
349 to lower current stimuli (Fig. 7b). Plotting the number of spikes vs. injected current showed a strong  
350 shift of the curve to the left (Fig. c), implying that the cell with  $iA\beta_o$  was more excitable. Indeed, the  
351 constant rheobase for firing was diminished in neurons treated with  $iA\beta_o$  (Fig. 7d). On the other  
352 hand, the calculated values for input resistance ( $R_{in}$ ) and kinetic parameters of action potentials  
353 (APs) (amplitude, duration and threshold) in both conditions were similar to control conditions  
354 (Additional file 1: Supplementary Figure 8). Furthermore, the recording of resting membrane  
355 potentials ( $V_m$ ), without current injection, evidenced a large increase in  $V_m$  fluctuations when  $iA\beta_o$   
356 was applied to the neuron (Fig. 7e).  $V_m$  fluctuations generated an assortment of local potentials  
357 that had more depolarized values in  $iA\beta_o$ -treated neurons (Control:  $-68.02 \pm 0.001$  v/s  $iA\beta_o$ :  $-63.55$   
358  $\pm 0.004$ ; Fig. 7f) nearing it to the AP firing threshold, which was also evidenced as a significant  
359 change in  $V_m$  standard deviation (SD) (Fig. 7g).  $iA\beta_o$  also increased the chance of spontaneous  
360 spike firing (Fig. 7h) (control:  $0.003 \pm 0.003$  Hz vs  $iA\beta_o$ :  $1.068 \pm 0.463$  Hz). Post recording

361 immunohistochemical analysis confirmed the location of the recorded neurons in the stratum  
362 pyramidale of dorsal hippocampus at CA1 (Fig. 7i – j).

363         After confirming the effects on excitability in an *in vivo* model and with the aim of examining  
364 the disease relevance and to contribute mechanistically to the results, we examined neuronal  
365 excitability hippocampal neurons. For this, current clamp experiments were performed and the  
366 effects of human derived (h-iA $\beta$ o) and synthetic (iA $\beta$ o) oligomers were evaluated. In agreement  
367 with the previous data, we found that a smaller current injection was required to trigger the firing of  
368 action potentials (AP) in the presence of h-iA $\beta$ o (Fig. 8a). Plotting the number of spikes vs. injected  
369 current demonstrated that the stimulus-response curve shifted to the left indicating an increase in  
370 neuronal excitability in the presence of h-iA $\beta$ o (Fig. 8b) together with a reduced rheobase (Fig. 8c).  
371 Similar results were obtained for synthetic iA $\beta$ o in the same model (Additional file 1: Supplementary  
372 Figure 9), confirming the effect of human and synthetic preparations on neuronal excitability *in vitro*.

373         We then evaluated if the effect of h-iA $\beta$ o on action potentials (APs) could be the result of  
374 augmented transitory depolarizations at the post-synaptic level due to the increase in AMPAergic  
375 neurotransmission. In order to examine this, we applied h-iA $\beta$ o and recorded the membrane  
376 potential (Vm) fluctuations of hippocampal neurons without current injection in the presence and  
377 absence of an intracellular voltage-dependent sodium channel (Na<sub>v</sub>) blocker (5 mM QX-314). When  
378 Na<sub>v</sub> were blocked, APs were not evident in the recorded neuron. In control conditions, Vm  
379 fluctuations generated a population of local synaptic potentials (Fig. 9a) with an average Vm value  
380 of  $-65.3 \pm 0.003$  mV (Fig. 9b), while in the presence of h-iA $\beta$ o there was a significant increase in  
381 the number and amplitude of these depolarizing events (Fig. 9a), with an average of  $-60.6 \pm 0.012$   
382 mV (Fig. 9b), similar to what we observed previously in the *in vivo* model. In the presence of iA $\beta$ o  
383 and QX-314 no major differences were observed in Vm fluctuations, except for the lack of AP spikes  
384 (Fig. 9a), showing a similar average Vm value to the one observed when h-iA $\beta$ o was present ( $-60.8$   
385  $\pm 0.017$  mV) (Fig. 9b). On the other hand, Vm in the presence of QX-314 had a similar average  
386 value to control condition with an average of  $-65.1 \pm 0.014$  mV (Fig. 9a-b, in gray). Similar results  
387 were obtained in the presence of synthetic iA $\beta$ o (Additional file 1: Supplementary Figure 10). It is

388 interesting to note that in all tested conditions the external application of an AMPA receptor  
389 antagonist (CNQX) through the perfusion system attenuated all Vm fluctuations (Fig. 9a), indicating  
390 that these changes in membrane potential in our experimental condition were synaptic AMPA-  
391 driven potentials. This confirms that the AMPAergic-mediated synaptic input is responsible for the  
392 iA $\beta$ o-mediated hyperexcitability observed in our experiments.

393 In presence of intracellular QX-314, no spikes (APs) were detected (Fig. 9c, 3<sup>th</sup> and 4<sup>th</sup>  
394 traces; left-to-right direction) confirming blockade of Na<sup>+</sup> channels. We also observed the presence  
395 of transitory depolarization (Fig. 9c, arrowheads over 3<sup>th</sup> trace; from left to right) that were not  
396 present in presence of QX-314 alone (Fig. 9c, 4<sup>th</sup> trace; from left to right). This data indicates that  
397 iA $\beta$ o exerts depolarizations of the post-synaptic membrane even in the absence of APs, which are  
398 mediated by AMPA receptors, suggesting that this effect did not depend on the generation of APs  
399 at the post-synaptic level, but rather an increase in synaptic transmission at pre- and post-synaptic  
400 levels.

401 In order to rule out the possibility that iA $\beta$ o was directly affecting intrinsic membrane  
402 properties and AP firing, we used a model of dorsal root ganglion neurons (DRG) that do not form  
403 synapses *in vitro* to record action potentials in the presence and absence of iA $\beta$ o. The results  
404 showed that iA $\beta$ o did not affect the AP firing nor did the rheobase constant (Additional file 1:  
405 Supplementary Figure 11a-d), contrary to the results found in hippocampal neurons. Additionally,  
406 and similar to hippocampal neurons, no significant differences were found in the parameters  
407 calculated for the APs evoked in this experiment such as amplitude, duration, and threshold  
408 (Additional file 1: Supplementary Figure 11e-g).

409

410

411



#### 412 **4. Discussion**

413 Presence of oligomeric species of A $\beta$  in the intraneuronal domain of the membrane was  
414 able to increase neurotransmission through mechanisms that involved pre-and post-synaptic  
415 actions that resulted in an increased excitability and spreading of neuronal activation. Because the  
416 present findings were obtained with human AD-brain derived and synthetic A $\beta$ <sub>0</sub>, they should  
417 contribute with disease-relevant data in a new and significant working model. Furthermore, using  
418 *in vitro* models allowed us to mechanistically understand the effects on neurotransmission and  
419 excitability that could be important in the initial stages of AD and that is likely occurring in an AD-  
420 human brain.

421 Contrary to previously published data using extracellular A $\beta$  or with more chronic  
422 application models [45–50], we did not find any synaptic deficits, instead, iA $\beta$ <sub>0</sub> increased excitatory  
423 and inhibitory neurotransmissions, but with more marked effects on the former. This raises the  
424 question of how could iA $\beta$ <sub>0</sub> actions progress to synaptic dysfunction in the first place? In this regard,  
425 it has been reported that extracellular A $\beta$  increases glutamate neurotransmission [51] which could  
426 lead to excitotoxicity [52–54] together with vesicular depletion over extended periods of time [55,56]  
427 [57–59]. If we consider these observations with the effects reported in this study, it is tempting to  
428 speculate that, over time, iA $\beta$ <sub>0</sub> influences synaptic depletion and this is in agreement with results  
429 from murine AD models that show that early intracellular accumulation of A $\beta$ <sub>0</sub> leads to synaptic  
430 failure and the onset of cognitive deficits (for further details see [60]), once again emphasizing the  
431 importance of iA $\beta$ <sub>0</sub> during the pre-symptomatic stage of AD.

#### 432 **Pre-synaptic mechanism: Increase in retrograde synaptic signaling by NO**

433 Simultaneous fluorescence and electrophysiology recordings demonstrated that NO is  
434 involved in the pre-synaptic effect of iA $\beta$ <sub>0</sub>. The data showed that iA $\beta$ <sub>0</sub> applied to the postsynaptic  
435 site augmented NO levels globally in the neurons together with the frequency of mPSCs, reflecting  
436 an enhanced release of neurotransmitters into the synaptic space [35], which is in agreement with  
437 studies that have shown that NO increases neurotransmitter release from the excitatory and

438 inhibitory synapses [61–63]. Furthermore, PKC is likely involved in this pre-synaptic effect of  $iA\beta_o$   
439 since CLR prevented the  $iA\beta_o$ -mediated increase in the mEPSCs frequency (Fig. 10a). In  
440 agreement with this notion, it was reported that PKC also participates in pre-synaptic mechanisms  
441 mediated by the gas neuromodulator NO [64–66], emphasizing the pathway that  $iA\beta_o$  might be  
442 using to increase neurotransmission.

443         The support for NO-signaling involvement in  $iA\beta_o$ -mediated pathology is multiple. First, we  
444 found that  $iA\beta_o$  increased this messenger in an ensemble of neurons. Second, during the  
445 development of AD, NO synthases (NOS) increase in rodent models and in human brains [67,68].  
446 Moreover, in pre-symptomatic 3xTg mice, it has been observed that this alterations that favor NO-  
447 synthesis occur together with synaptic pathology [68]. Thus, we can hypothesize that unregulated  
448 release of NO in AD pathology might have negative consequences for neuronal function. Third, at  
449 the cellular level a prolonged release of NO could also cause metabolic, oxidative stress, and  
450 dysfunction in organelles such as mitochondria and ER, eventually leading to neuronal death [69–  
451 73]. Therefore, the results agree with current studies indicating that NO signaling is altered through  
452 different mechanisms during the development of AD.

#### 453 **Post-synaptic mechanism for AMPA transmission potentiation**

454         The data indicate that  $iA\beta_o$  caused a post-synaptic potentiation through the increase in the  
455 AMPA-mediated current. Generally speaking, a change in mEPSC amplitude is a reflection of a  
456 change at the post-synaptic level [74]. However, this is not the only case, since this might also be  
457 explained by an increased neurotransmitter content in synaptic vesicles, translating into an  
458 increase in the amplitude of post-synaptic currents [75]. This was not the case for  $iA\beta_o$  because  
459 evoked currents with a saturating concentration of AMPA still increased the amplitude of the  
460 current, supporting the idea that the effect was postsynaptic in nature. Physiologically relevant, the  
461 amplitude of AMPA-evoked and miniature-AMPAergic currents (mEPSCs) increased in the  
462 presence of  $iA\beta_o$ , an effect that was largely attenuated in the presence of a PKC inhibitor (CLR).  
463 In general, several kinases found in hippocampal neurons, including PKA (Protein kinase A) and

464 CAMKII (Ca<sup>2+</sup>/Calmodulin Protein kinase II), can have similar effects may affect AMPA receptors.  
465 For example, CAMKII increases AMPA receptor conductance [76] and the number of synaptic  
466 physical contacts, improving the connectivity that mediates excitatory transmission [77]. On the  
467 other hand, PKA can increase the number of AMPAR at the synapse [78], as well as increase the  
468 release of neurotransmitters at the pre-synaptic site [79].

469 In this regard, Whitcomb and co-workers reported a PKA dependent increase on AMPA  
470 current amplitude in response to iA $\beta$ o in hippocampal slices [80]. However, their results differed  
471 from the present because they required longer times of exposure and it was dependent on calcium.  
472 The discrepancies may be due to differences in oligomers preparation, time exposure course, or  
473 the effective concentration, since in the present study the amplitude increased only with higher  
474 concentrations. Interestingly, another study in cultured autaptic hippocampal neurons found that  
475 intracellular A $\beta$  decreased neurotransmission by an unknown mechanism [81]. The present results  
476 allows us to conclude that the increase in AMPA receptor function represents a main mechanism  
477 by which iA $\beta$ o depolarizes the post-synaptic membrane and increases the probability for action  
478 potential firing (Fig. 10c and d).

479 **Implications of pre- and post-synaptic effects at circuit level in AD pathology: NO functional**  
480 **spreading and neural excitability in AD**

481 The question that became evident after finding that iA $\beta$ o was able to produce large  
482 increases in the E/I balance was if this could have a more global consequence on neuronal  
483 hyperexcitability. First, we were able to demonstrate that iA $\beta$ o induced rapid and large modifications  
484 of the bioelectric activity of hippocampal neurons leading to an “epileptiform like phenomena”,  
485 which was evidenced by the presence of complex discharge activity composed of synaptic  
486 depolarization and spike firing, both initiated by an increase in AMPA neurotransmission.

487 A quite novel result found during our study was that not only the hippocampal neuron that  
488 had iA $\beta$ o became overactive, but also neighboring neurons displayed increases in NO-production  
489 in a synchronized fashion. This suggests that there is a phenomenon in which the functional effect

490 of iA $\beta$ o extends to surrounding neurons in a coordinated way. In other words, by mechanisms only  
491 now beginning to be appreciated, iA $\beta$ o alters the function of hippocampal neurons beyond where  
492 it is physically present, thus, iA $\beta$ o has an impact at the circuit level (Fig. 10e).

493 This phenomenon of increased synchronization, closely resembles the effect of prions of  
494 the nervous system, which have been shown to spread the pathology through the brain [82,83].  
495 The difference is that in our case there would be no transmission of iA $\beta$ o *per se*, but only of the  
496 functional effects that it produces. Therefore, we have adopted the term "functional spreading" to  
497 refer to this phenomenon.

498 Now, the consequence of increasing NO is functional because as NO is released the  
499 probability of increasing the discharge of excitatory neurotransmitters in nearby areas is also  
500 increased [84–86], thus increasing neuronal activity, frequency of action potential firing, and  
501 excitability of the neural network [71], [87,88]. Also, in an epilepsy model induced by the  
502 intrahippocampal injection of kainate, a well-known AMPA receptor agonist, an increase in NOS  
503 activity was observed suggesting a direct link between NO and AMPA-mediated epileptiform  
504 activity [89]. There is a strong link between AMPAR and epilepsy [90], and the antagonists  
505 significantly reduced or nullified epileptiform activity in hippocampal neurons [91,92]. Thus, our  
506 results support the existence of a strong relationship between NO and glutamatergic  
507 neurotransmission in the genesis of epileptic hyperexcitability, which could be contributing to the  
508 neuronal excitability observed in our models and to the epileptiform activity exhibited by murine AD  
509 models and more importantly AD patients [14,15,25,93].

510 Considering our results, it is possible to hypothesize that only a few neurons that with iA $\beta$ o  
511 could initiate the increase in neurotransmission and excitability in the network, initiating an  
512 epileptogenic focus and triggering a functional spreading phenomenon for the whole neuronal  
513 ensemble, with very disrupting consequences to the brain.

514 Taken together, our study suggests that iA $\beta$ o exerts two effects (pre- and post-synaptic)  
515 that seem to be site independent for its expression, but both initially triggered signal transduction

516 pathways (Fig.11 a). They could provide a potential mechanism to explain early stages of AD, when  
517  $iA\beta_0$  accumulates, increasing neuronal hyperexcitability and becoming an epileptogenic focus at  
518 the AD onset. Therefore, the prevention of early effects of  $iA\beta_0$ , which are mainly intracellular, can  
519 potentially be a new therapeutic target for AD. Early treatment could partially or totally reverse the  
520 molecular mechanisms by which the peptide initially triggers the synaptic impairment observed in  
521 patients in more advanced stages of this disease.

522

523

524

525

526

527

528

529

530

531

532

533

534

535

536 **5. Conclusions**

537 Taking together *in vitro*, *ex vivo* and *in vivo* data, we conclude that human and synthetic iA $\beta$ o  
538 induce hyperexcitability through a synaptic-driven mechanism involving AMPA receptors and NO  
539 as a retrograde signaling molecule. Additionally, we describe a novel phenomenon in which the  
540 functional effect of iA $\beta$ o on NO production extends to surrounding neurons in a coordinated way.  
541 These important findings give new a new meaning to intracellular A $\beta$  accumulation, an early event  
542 in the pathology, and uncovers a novel mechanistic explanation for the functional spreading of  
543 iA $\beta$ o-mediated hyperexcitability in a neuronal ensemble.

544

545

546

547

548

549

550

551

552

553

554

555

556

557

558

559

560

561

562

563

564 **6. Abbreviations**

565 **AMPA**  $\alpha$ -amino-3-hydroxy-5-methyl-4-isoxazolepropionic acid

566 **APs** Action potentials

567 **APP** Amyloid precursor protein

568 **A $\beta$**  Amyloid- $\beta$  peptide

569 **CLR** Chelerythrine

570 **EA** Alzheimer's disease

571 **eEPSCs** Evoked excitatory post-synaptic currents

572 **eIPSCs** Evoked inhibitory post-synaptic currents

573 **eNOS** Endothelial nitric oxide synthase

574 **h-iA $\beta$ o** human AD brain-derived A $\beta$  oligomers

575 **iA $\beta$ o** synthetic intracellular A $\beta$  oligomers

576 **iNOS** Inducible nitric oxide synthase

577 **mEPSCs** Miniature excitatory post-synaptic currents

578 **mIPSCs** Miniature inhibitory post-synaptic currents

579 **mPSCs** Miniature post-synaptic currents

580 **Na<sub>v</sub>** Voltage-dependent sodium channel

581 **nNOS** Neuronal nitric oxide synthase

|     |              |                       |
|-----|--------------|-----------------------|
| 582 | <b>NO</b>    | Nitric oxide          |
| 583 | <b>NOS</b>   | Nitric oxide synthase |
| 584 | <b>PKC</b>   | Protein kinase C      |
| 585 | <b>PLC</b>   | Phospholipase C       |
| 586 | <b>PSEN1</b> | Presenilin-1          |
| 587 | <b>TTX</b>   | Tetrodotoxin          |
| 588 | <b>Vm</b>    | Membrane potential    |
| 589 |              |                       |
| 590 |              |                       |
| 591 |              |                       |
| 592 |              |                       |
| 593 |              |                       |
| 594 |              |                       |
| 595 |              |                       |
| 596 |              |                       |
| 597 |              |                       |
| 598 |              |                       |
| 599 |              |                       |
| 600 |              |                       |
| 601 |              |                       |
| 602 |              |                       |
| 603 |              |                       |
| 604 |              |                       |
| 605 |              |                       |



606 **7. Declarations**

607 **Ethics approval**

608 All experimental procedures were according to Institutional Animal Care and Use Committee at the  
609 University of Concepción animal research regulations.

610 **Consent for publication**

611 Not applicable

612 **Availability of data and materials**

613 The datasets used and/or analyzed during the current study are available from the corresponding  
614 author on reasonable request.

615 **Competing interests**

616 The authors declare that they have no competing interests

617 **Funding**

618 This work was supported by Fondecyt Grants 1140473 (LGA) and 1180752 (LGA). EJFP was  
619 supported by PhD Conicyt fellowship 81150045.

620 **Author Contributions**

621 EJFP and LGA designed experiments, discussed the results, contributed to all stages of manuscript  
622 preparation and editing. Material preparation, data collection and analysis were performed by  
623 EJFP, BM, DAB, CP, NORL, MPE, JPM, CF, RB, US. All authors read and approved the final  
624 manuscript.

625 **Acknowledgments**

626 The authors would like to thank Marco Fuenzalida, Juan Pablo Henriquez and Marcela Torrejón for  
627 their invaluable comments and for helpful discussion. The authors also thanks Agenor Limon and

628 Lauren Aguayo for having read and provided useful suggestions to the manuscript. For technical  
629 support we thank: Laurie Aguayo, César Lara, Daniela Nova, Alejandra Ramírez, Ixia Cid, Javiera  
630 Gavilan and Jocelin González.

631

632

633

634

635

636

637

638

639

640

641

642

643

644

645

646

647

648

649 **8. References**

- 650 1. Selkoe DJ, Hardy J. The amyloid hypothesis of Alzheimer's disease at 25 years. *EMBO Mol*  
651 *Med.* 2016;
- 652 2. Edwards FA. A Unifying Hypothesis for Alzheimer's Disease: From Plaques to  
653 Neurodegeneration. *Trends Neurosci.* 2019.
- 654 3. Welikovitsh LA, Do Carmo S, Maglóczy Z, Szocsics P, Lőke J, Freund T, et al. Evidence of  
655 intraneuronal A $\beta$  accumulation preceding tau pathology in the entorhinal cortex. *Acta Neuropathol*  
656 [Internet]. Springer Berlin Heidelberg; 2018 [cited 2019 Feb 19];136:901–17. Available from:  
657 <http://link.springer.com/10.1007/s00401-018-1922-z>
- 658 4. Pensalfini A, Albay 3rd R, Rasool S, Wu JW, Hatami A, Arai H, et al. Intracellular amyloid and  
659 the neuronal origin of Alzheimer neuritic plaques. *Neurobiol Dis* [Internet]. 2014/08/06. 2014;71:53–  
660 61. Available from: <http://www.ncbi.nlm.nih.gov/pubmed/25092575>
- 661 5. Oddo S, Caccamo A, Shepherd JD, Murphy MP, Golde TE, Kaye R, et al. Triple-transgenic  
662 model of Alzheimer's Disease with plaques and tangles: Intracellular A $\beta$  and synaptic dysfunction.  
663 *Neuron.* 2003;
- 664 6. Billings LM, Oddo S, Green KN, McGaugh JL, LaFerla FM. Intraneuronal Abeta causes the onset  
665 of early Alzheimer's disease-related cognitive deficits in transgenic mice. *Neuron* [Internet].  
666 2005/03/08. 2005;45:675–88. Available from: <http://www.ncbi.nlm.nih.gov/pubmed/15748844>
- 667 7. Oddo S, Caccamo A, Smith IF, Green KN, LaFerla FM. A dynamic relationship between  
668 intracellular and extracellular pools of Abeta. *Am J Pathol* [Internet]. 2006/01/10. 2006;168:184–  
669 94. Available from: <http://www.ncbi.nlm.nih.gov/pubmed/16400022>
- 670 8. Wirths O, Bayer TA. Neuron loss in transgenic mouse models of Alzheimer's disease. *Int J*  
671 *Alzheimers Dis* [Internet]. Hindawi Limited; 2010 [cited 2019 Feb 18];2010. Available from:  
672 <http://www.ncbi.nlm.nih.gov/pubmed/20871861>

- 673 9. Iulita MF, Allard S, Richter L, Munter LM, Ducatenzeiler A, Weise C, et al. Intracellular A $\beta$   
674 pathology and early cognitive impairments in a transgenic rat overexpressing human amyloid  
675 precursor protein: A multidimensional study. *Acta Neuropathol Commun*. 2014;
- 676 10. Tomiyama T, Matsuyama S, Iso H, Umeda T, Takuma H, Ohnishi K, et al. A Mouse Model of  
677 Amyloid  $\beta$  Oligomers: Their Contribution to Synaptic Alteration, Abnormal Tau Phosphorylation,  
678 Glial Activation, and Neuronal Loss &em&gt;In Vivo&lt;/em&gt; J Neurosci [Internet].  
679 2010;30:4845 LP – 4856. Available from: <http://www.jneurosci.org/content/30/14/4845.abstract>
- 680 11. Huijbers W, Mormino EC, Schultz AP, Wigman S, Ward AM, Larvie M, et al. Amyloid- $\beta$   
681 deposition in mild cognitive impairment is associated with increased hippocampal activity, atrophy  
682 and clinical progression. *Brain*. 2015;
- 683 12. Dickerson BC, Salat DH, Greve DN, Chua EF, Rand-Giovannetti E, Rentz DM, et al. Increased  
684 hippocampal activation in mild cognitive impairment compared to normal aging and AD. *Neurology*.  
685 2005;
- 686 13. Born HA. Seizures in Alzheimer's disease. *Neuroscience*. 2015.
- 687 14. Hommet C, Mondon K, Camus V, De Toffol B, Constans T. Epilepsy and dementia in the elderly.  
688 *Dement Geriatr Cogn Disord* [Internet]. 2008/03/04. 2008;25:293–300. Available from:  
689 <http://www.ncbi.nlm.nih.gov/pubmed/18311076>
- 690 15. Amatniek JC, Hauser WA, DelCastillo-Castaneda C, Jacobs DM, Marder K, Bell K, et al.  
691 Incidence and predictors of seizures in patients with Alzheimer's disease. *Epilepsia* [Internet].  
692 2006/05/12. 2006;47:867–72. Available from: <http://www.ncbi.nlm.nih.gov/pubmed/16686651>
- 693 16. Lozsadi DA, Larner AJ. Prevalence and causes of seizures at the time of diagnosis of probable  
694 Alzheimer's disease. *Dement Geriatr Cogn Disord*. 2006;
- 695 17. Mendez MF, Lim GTH. Seizures in elderly patients with dementia: Epidemiology and  
696 management. *Drugs and Aging*. 2003;

- 697 18. Cabrejo L, Guyant-Maréchal L, Laquerrière A, Vercelletto M, De La Fournière F, Thomas-  
698 Antérieur C, et al. Phenotype associated with APP duplication in five families. *Brain*. 2006;
- 699 19. Snider BJ, Norton J, Coats MA, Chakraverty S, Hou CE, Jervis R, et al. Novel presenilin 1  
700 mutation (S170F) causing Alzheimer disease with lewy bodies in the third decade of life. *Arch*  
701 *Neurol*. 2005;
- 702 20. Marcon G, Giaccone G, Cupidi C, Balestrieri M, Beltrami CA, Finato N, et al. Neuropathological  
703 and Clinical Phenotype of an Italian Alzheimer Family with M239V Mutation of Presenilin 2 Gene.  
704 *J Neuropathol Exp Neurol*. 2004;
- 705 21. Cuevas ME, Haensgen H, Sepulveda FJ, Zegers G, Roa J, Opazo C, et al. Soluble Aβ(1-  
706 40) peptide increases excitatory neurotransmission and induces epileptiform activity in  
707 hippocampal neurons. *J Alzheimers Dis* [Internet]. 2011/02/10. 2011;23:673–87. Available from:  
708 <http://www.ncbi.nlm.nih.gov/pubmed/21304182>
- 709 22. Born HA, Kim JY, Savjani RR, Das P, Dabaghian YA, Guo Q, et al. Genetic suppression of  
710 transgenic APP rescues Hypersynchronous network activity in a mouse model of Alzheimer's  
711 disease. *J Neurosci* [Internet]. 2014/03/14. 2014;34:3826–40. Available from:  
712 <http://www.ncbi.nlm.nih.gov/pubmed/24623762>
- 713 23. Brown JT, Chin J, Leiser SC, Pangalos MN, Randall AD. Altered intrinsic neuronal excitability  
714 and reduced Na<sup>+</sup> currents in a mouse model of Alzheimer's disease. *Neurobiol Aging* [Internet].  
715 2011/07/29. 2011;32:2109 e1-14. Available from: <http://www.ncbi.nlm.nih.gov/pubmed/21794952>
- 716 24. Bezzina C, Verret L, Juan C, Remaud J, Halley H, Rampon C, et al. Early onset of  
717 hypersynchronous network activity and expression of a marker of chronic seizures in the Tg2576  
718 mouse model of Alzheimer's disease. *PLoS One*. 2015;
- 719 25. Minkeviciene R, Rheims S, Dobszay MB, Zilberter M, Hartikainen J, Fulop L, et al. Amyloid  
720 beta-induced neuronal hyperexcitability triggers progressive epilepsy. *J Neurosci* [Internet].  
721 2009/03/20. 2009;29:3453–62. Available from: <http://www.ncbi.nlm.nih.gov/pubmed/19295151>

- 722 26. Yoshiike Y, Kaye R, Milton SC, Takashima A, Glabe CG. Pore-forming proteins share  
723 structural and functional homology with amyloid oligomers. *NeuroMolecular Med.* 2007;
- 724 27. Šišková Z, Justus D, Kaneko H, Friedrichs D, Henneberg N, Beutel T, et al. Dendritic structural  
725 degeneration is functionally linked to cellular hyperexcitability in a mouse model of Alzheimer's  
726 disease. *Neuron.* 2014;
- 727 28. Bell KFS, Bennett DA, Cuervo AC. Paradoxical upregulation of glutamatergic presynaptic  
728 boutons during mild cognitive impairment. *J Neurosci.* 2007;
- 729 29. Hascup ER, Broderick SO, Russell MK, Fang Y, Bartke A, Boger HA, et al. Diet-induced insulin  
730 resistance elevates hippocampal glutamate as well as VGLUT1 and GFAP expression in  
731 A $\beta$ PP/PS1 mice. *J Neurochem.* 2019;
- 732 30. Hascup KN, Hascup ER. Altered neurotransmission prior to cognitive decline in A $\beta$ PP/PS1  
733 mice, a model of Alzheimer's disease. *J Alzheimer's Dis.* 2015;
- 734 31. Lei M, Xu H, Li Z, Wang Z, O'Malley TT, Zhang D, et al. Soluble A $\beta$  oligomers impair  
735 hippocampal LTP by disrupting glutamatergic/GABAergic balance. *Neurobiol Dis.* 2016;
- 736 32. Vizi ES, Kiss JP. Neurochemistry and pharmacology of the major hippocampal transmitter  
737 systems: Synaptic and nonsynaptic interactions. *Hippocampus.* 1998;
- 738 33. Raymond LA, Blackstone CD, Huganir RL. Phosphorylation of amino acid neurotransmitter  
739 receptors in synaptic plasticity. *Trends Neurosci.* 1993.
- 740 34. Ling DSF, Benardo LS, Sacktor TC. Protein kinase M $\zeta$  enhances excitatory synaptic  
741 transmission by increasing the number of active postsynaptic AMPA receptors. *Hippocampus.*  
742 2006;
- 743 35. Malgaroli A, Tsien RW. Glutamate-induced long-term potentiation of the frequency of miniature  
744 synaptic currents in cultured hippocampal neurons. *Nature.* 1992;
- 745 36. Suvarna Y, Maity N, Shivamurthy MC. Emerging Trends in Retrograde Signaling. *Mol.*

- 746 Neurobiol. 2016.
- 747 37. Hardingham N, Dachtler J, Fox K. The role of nitric oxide in pre-synaptic plasticity and  
748 homeostasis. *Front Cell Neurosci.* 2013;
- 749 38. Arancio O, Kiebler M, Lee CJ, Lev-Ram V, Tsien RY, Kandel ER, et al. Nitric oxide acts directly  
750 in the presynaptic neuron to produce long-term potentiation in cultured hippocampal neurons. *Cell*  
751 [Internet]. 1996;87:1025–35. Available from: <http://www.ncbi.nlm.nih.gov/pubmed/8978607>
- 752 39. Hawkins RD, Son H, Arancio O. Nitric oxide as a retrograde messenger during long-term  
753 potentiation in hippocampus. *Prog Brain Res* [Internet]. 1999/02/05. 1998;118:155–72. Available  
754 from: <http://www.ncbi.nlm.nih.gov/pubmed/9932440>
- 755 40. Gouras GK, Tsai J, Naslund J, Vincent B, Edgar M, Checler F, et al. Intraneuronal A $\beta$ 42  
756 accumulation in human brain. *Am J Pathol.* 2000;
- 757 41. Padurariu M, Ciobica A, Mavroudis I, Fotiou D, Baloyannis S. Hippocampal neuronal loss in the  
758 CA1 and CA3 areas of Alzheimer’s disease patients. *Psychiatr Danub.* 2012;
- 759 42. Braak H, Alafuzoff I, Arzberger T, Kretschmar H, Tredici K. Staging of Alzheimer disease-  
760 associated neurofibrillary pathology using paraffin sections and immunocytochemistry. *Acta*  
761 *Neuropathol.* 2006;
- 762 43. Kerchner GA, Hess CP, Hammond-Rosenbluth KE, Xu D, Rabinovici GD, Kelley DAC, et al.  
763 Hippocampal CA1 apical neuropil atrophy in mild Alzheimer disease visualized with 7-T MRI.  
764 *Neurology.* 2010;
- 765 44. LaFerla FM, Green KN, Oddo S. Intracellular amyloid-beta in Alzheimer’s disease. *Nat Rev*  
766 *Neurosci* [Internet]. 2007 [cited 2014 Mar 21];8:499–509. Available from:  
767 <http://www.ncbi.nlm.nih.gov/pubmed/17551515>
- 768 45. Puzzo D, Piacentini R, Fa M, Gulisano W, Li Puma DD, Staniszewski A, et al. LTP and memory  
769 impairment caused by extracellular A $\beta$  and tau oligomers is APP- dependent. *Elife.* 2017;

- 770 46. Takamura A, Sato Y, Watabe D, Okamoto Y, Nakata T, Kawarabayashi T, et al. Sortilin is  
771 required for toxic action of A $\beta$  oligomers (A $\beta$ O $s$ ): Extracellular A $\beta$ O $s$  trigger apoptosis, and  
772 intraneuronal A $\beta$ O $s$  impair degradation pathways. *Life Sci.* 2012;
- 773 47. Shankar GM, Bloodgood BL, Townsend M, Walsh DM, Selkoe DJ, Sabatini BL. Natural  
774 oligomers of the Alzheimer amyloid- $\beta$  protein induce reversible synapse loss by modulating an  
775 NMDA-type glutamate receptor-dependent signaling pathway. *J Neurosci.* 2007;
- 776 48. Klyubin I, Betts V, Welzel AT, Blennow K, Zetterberg H, Wallin A, et al. Amyloid beta protein  
777 dimer-containing human CSF disrupts synaptic plasticity: prevention by systemic passive  
778 immunization. *J Neurosci* [Internet]. 2008 [cited 2014 Apr 8];28:4231–7. Available from:  
779 [http://www.pubmedcentral.nih.gov/articlerender.fcgi?artid=2685151&tool=pmcentrez&rendertype](http://www.pubmedcentral.nih.gov/articlerender.fcgi?artid=2685151&tool=pmcentrez&rendertype=abstract)  
780 =abstract
- 781 49. Ding Y, Zhao J, Zhang X, Wang S, Viola KL, Chow FE, et al. Amyloid Beta Oligomers Target  
782 to Extracellular and Intracellular Neuronal Synaptic Proteins in Alzheimer’s Disease. *Front Neurol.*  
783 2019;
- 784 50. J. Fernandez-Perez E, Peters C, G. Aguayo L. Membrane Damage Induced by Amyloid Beta  
785 and a Potential Link with Neuroinflammation. *Curr Pharm Des.* 2016;
- 786 51. Parodi J, Sepúlveda FJ, Roa J, Opazo C, Inestrosa NC, Aguayo LG. Beta-amyloid causes  
787 depletion of synaptic vesicles leading to neurotransmission failure. *J Biol Chem* [Internet].  
788 2010;285:2506–14. Available from: <http://www.ncbi.nlm.nih.gov/pubmed/19915004>
- 789 52. Mehta A, Prabhakar M, Kumar P, Deshmukh R, Sharma PL. Excitotoxicity: Bridge to various  
790 triggers in neurodegenerative disorders. *Eur. J. Pharmacol.* 2013.
- 791 53. Olloquequi J, Cornejo-Córdova E, Verdaguer E, Soriano FX, Binvignat O, Auladell C, et al.  
792 Excitotoxicity in the pathogenesis of neurological and psychiatric disorders: Therapeutic  
793 implications. *J. Psychopharmacol.* 2018.
- 794 54. Harkany T, Abrahám I, Timmerman W, Laskay G, Tóth B, Sasvári M, et al. Beta-Amyloid



- 795 Neurotoxicity Is Mediated By a Glutamate-Triggered Excitotoxic Cascade in Rat Nucleus Basalis.  
796 Eur J Neurosci [Internet]. 2000;12:2735–45. Available from:  
797 <http://www.ncbi.nlm.nih.gov/pubmed/10971616>
- 798 55. Marsh J, Alifragis P. Synaptic dysfunction in Alzheimer’s disease: The effects of amyloid beta  
799 on synaptic vesicle dynamics as a novel target for therapeutic intervention. *Neural Regen. Res.*  
800 2018.
- 801 56. Crews L, Masliah E. Molecular mechanisms of neurodegeneration in Alzheimer’s disease. *Hum*  
802 *Mol Genet* [Internet]. 2010 [cited 2014 Mar 25];19:R12-20. Available from:  
803 <http://www.pubmedcentral.nih.gov/articlerender.fcgi?artid=2875049&tool=pmcentrez&rendertype>  
804 =abstract
- 805 57. Reeve AK, Krishnan KJ, Duchen MR, Turnbull DM. Mitochondrial dysfunction in  
806 neurodegenerative disorders. *Mitochondrial Dysfunct. Neurodegener. Disord.* 2012.
- 807 58. Wallace DC, Lott MT, Procaccio V. Mitochondrial Medicine: The Mitochondrial Biology and  
808 Genetics of Metabolic and Degenerative Diseases, Cancer, and Aging. *Emery Rimoin’s Princ Pract*  
809 *Med Genet.* 2013.
- 810 59. Fong S, Teo E, Ng LF, Chen CB, Lakshmanan LN, Tsoi SY, et al. Energy crisis precedes global  
811 metabolic failure in a novel *Caenorhabditis elegans* Alzheimer Disease model. *Sci Rep.* 2016;
- 812 60. Bayer TA, Wirths O. Intracellular accumulation of amyloid-Beta - a predictor for synaptic  
813 dysfunction and neuron loss in Alzheimer’s disease. *Front Aging Neurosci* [Internet]. 2010/06/17.  
814 2010;2:8. Available from: <http://www.ncbi.nlm.nih.gov/pubmed/20552046>
- 815 61. Zanelli S, Naylor M, Kapur J. Nitric oxide alters GABAergic synaptic transmission in cultured  
816 hippocampal neurons. *Brain Res.* 2009;
- 817 62. McNaught KSP, Brown GC. Nitric Oxide Causes Glutamate Release from Brain Synaptosomes.  
818 *J Neurochem.* 2002;

- 819 63. Prast H, Philippu A. Nitric oxide as modulator of neuronal function. *Prog. Neurobiol.* 2001.
- 820 64. Song T, Hatano N, Kambe T, Miyamoto Y, Ihara H, Yamamoto H, et al. Nitric oxide-mediated  
821 modulation of calcium/calmodulin-dependent protein kinase II. *Biochem J.* 2008;
- 822 65. Ping P, Takano H, Zhang J, Tang XL, Qiu Y, Li RCX, et al. Isoform-selective activation of protein  
823 kinase C by nitric oxide in the heart of conscious rabbits: A signaling mechanism for both nitric  
824 oxide- induced and ischemia-induced preconditioning. *Circ Res.* 1999;
- 825 66. Leppänen T, Tuominen RK, Moilanen E. Protein kinase C and its inhibitors in the regulation of  
826 inflammation: Inducible nitric oxide synthase as an example. *Basic Clin. Pharmacol. Toxicol.* 2014.
- 827 67. Lüth HJ, Münch G, Arendt T. Aberrant expression of NOS isoforms in Alzheimer's disease is  
828 structurally related to nitrotyrosine formation. *Brain Res.* 2002;
- 829 68. Shilling D, Muller M, Takano H, Mak D-OD, Abel T, Coulter DA, et al. Suppression of InsP3  
830 Receptor-Mediated Ca<sup>2+</sup> Signaling Alleviates Mutant Presenilin-Linked Familial Alzheimer's  
831 Disease Pathogenesis. *J Neurosci.* 2014;
- 832 69. Andersen JK. Oxidative stress in neurodegeneration: Cause or consequence? *Nat Rev*  
833 *Neurosci.* 2004;
- 834 70. Sayre LM, Perry G, Smith MA. Oxidative stress and neurotoxicity. *Chem. Res. Toxicol.* 2008.
- 835 71. Steinert JR, Chernova T, Forsythe ID. Nitric oxide signaling in brain function, dysfunction, and  
836 dementia. *Neuroscientist.* 2010.
- 837 72. Moncada S, Higgs EA. Nitric oxide and the vascular endothelium. *Handb Exp Pharmacol.* 2006;
- 838 73. Moncada S, Bolaños JP. Nitric oxide, cell bioenergetics and neurodegeneration. *J. Neurochem.*  
839 2006.
- 840 74. Manabe T, Renner P, Nicoll RA. Postsynaptic contribution to long-term potentiation revealed  
841 by the analysis of miniature synaptic currents. *Nature.* 1992;

- 842 75. Kullmann DM, Nicoll RA. Long-term potentiation is associated with increases in quantal content  
843 and quantal amplitude. *Nature*. 1992;
- 844 76. Lee HK, Barbarosie M, Kameyama K, Bear MF, Huganir RL. Regulation of distinct AMPA  
845 receptor phosphorylation sites during bidirectional synaptic plasticity. *Nature*. 2000;
- 846 77. Pratt KG, Watt AJ, Griffith LC, Nelson SB, Turrigiano GG. Activity-dependent remodeling of  
847 presynaptic inputs by postsynaptic expression of activated CaMKII. *Neuron*. 2003;
- 848 78. Esteban JA, Shi SH, Wilson C, Nuriya M, Huganir RL, Malinow R. PKA phosphorylation of  
849 AMPA receptor subunits controls synaptic trafficking underlying plasticity. *Nat Neurosci*. 2003;
- 850 79. Carroll RC, Nicoll RA, Malenka RC. Effects of PKA and PKC on miniature excitatory  
851 postsynaptic currents in CA1 pyramidal cells. *J Neurophysiol*. 1998;
- 852 80. Whitcomb DJ, Hogg EL, Regan P, Piers T, Narayan P, Whitehead G, et al. Intracellular  
853 oligomeric amyloid-beta rapidly regulates GluA1 subunit of AMPA receptor in the hippocampus.  
854 *Sci Rep*. 2015;
- 855 81. Ripoli C, Cocco S, Li Puma DD, Piacentini R, Mastrodonato A, Scala F, et al. Intracellular  
856 accumulation of amyloid-beta (Abeta) protein plays a major role in Abeta-induced alterations of  
857 glutamatergic synaptic transmission and plasticity. *J Neurosci* [Internet]. 2014/09/19.  
858 2014;34:12893–903. Available from: <http://www.ncbi.nlm.nih.gov/pubmed/25232124>
- 859 82. Fraser PE. Prions and prion-like proteins. *J. Biol. Chem*. 2014.
- 860 83. Domert J, Rao SB, Agholme L, Brorsson AC, Marcusson J, Hallbeck M, et al. Spreading of  
861 amyloid- $\beta$  peptides via neuritic cell-to-cell transfer is dependent on insufficient cellular clearance.  
862 *Neurobiol Dis*. 2014;
- 863 84. Rowley NM, Madsen KK, Schousboe A, Steve White H. Glutamate and GABA synthesis,  
864 release, transport and metabolism as targets for seizure control. *Neurochem Int*. 2012;
- 865 85. Meldrum BS. The role of glutamate in epilepsy and other CNS disorders. *Neurology*. 1994;

- 866 86. Choi DW, Rothman SM. The Role of Glutamate Neurotoxicity in Hypoxic-Ischemic Neuronal  
867 Death. *Annu Rev Neurosci*. 2003;
- 868 87. Steinert JR, Robinson SW, Tong H, Haustein MD, Kopp-Scheinpflug C, Forsythe ID. Nitric  
869 Oxide Is an Activity-Dependent Regulator of Target Neuron Intrinsic Excitability. *Neuron*. 2011;
- 870 88. Balez R, Ooi L. Getting to NO Alzheimer's disease: Neuroprotection versus neurotoxicity  
871 mediated by nitric oxide. *Oxid. Med. Cell. Longev*. 2016.
- 872 89. Yasuda H, Fujii M, Fujisawa H, Ito H, Suzuki M. Changes in Nitric Oxide Synthesis and Epileptic  
873 Activity in the Contralateral Hippocampus of Rats Following Intrahippocampal Kainate Injection.  
874 *Epilepsia*. 2008;
- 875 90. Honoré T, Davies SN, Dreier J, Fletcher EJ, Jacobsen P, Lodge D, et al. Quinoxalinediones:  
876 Potent competitive Non-NMDA glutamate receptor antagonists. *Science* (80- ). 1988;
- 877 91. McBain CJ, Boden P, Hill RG. The kainate/quisqualate receptor antagonist, CNQX, blocks the  
878 fast component of spontaneous epileptiform activity in organotypic cultures of rat hippocampus.  
879 *Neurosci Lett*. 1988;
- 880 92. Neuman RS, Ben-Ari Y, Cherubini E. Antagonism of spontaneous and evoked bursts by 6-  
881 cyano-7-nitroquinoxaline-2,3-dione (CNQX) in the CA3 region of the in vitro hippocampus. *Brain*  
882 *Res*. 1988;
- 883 93. Davis KE, Fox S, Gigg J. Increased hippocampal excitability in the 3xTgAD mouse model for  
884 Alzheimer's disease in vivo. *PLoS One* [Internet]. 2014/03/14. 2014;9:e91203. Available from:  
885 <http://www.ncbi.nlm.nih.gov/pubmed/24621690>
- 886 94. Fernández-Pérez EJ, Sepúlveda FJ, Peters C, Bascuñán D, Riffo-Lepe NO, González-  
887 Sanmiguel J, et al. Effect of cholesterol on membrane fluidity and association of A $\beta$  oligomers and  
888 subsequent neuronal damage: A Double-Edged Sword. *Front Aging Neurosci*. 2018;
- 889 95. Fernández-Pérez EJ, Sepúlveda FJ, Peoples R, Aguayo LG. Role of membrane GM1 on early

890 neuronal membrane actions of A $\beta$  during onset of Alzheimer's disease. *Biochim Biophys Acta - Mol*  
891 *Basis Dis.* 2017;

892 96. Sengupta U, Guerrero-Muñoz MJ, Castillo-Carranza DL, Lasagna-Reeves CA, Gerson JE,  
893 Paulucci-Holthauzen AA, et al. Pathological Interface between Oligomeric Alpha-Synuclein and  
894 Tau in Synucleinopathies. *Biol Psychiatry.* 2015;

895 97. Förster B, Muñoz B, Lobo MK, Chandra R, Lovinger DM, Aguayo LG. Presence of ethanol-  
896 sensitive glycine receptors in medium spiny neurons in the mouse nucleus accumbens. *J Physiol.*  
897 2017;

898 98. Morgan PJ, Bourboulou R, Filippi C, Koenig-Gambini J, Epsztein J. Kv1.1 contributes to a rapid  
899 homeostatic plasticity of intrinsic excitability in CA1 pyramidal neurons in vivo. *Elife.* 2019;

900 99. Schuchmann S, Albrecht D, Heinemann U, Von Bohlen und Halbach O. Nitric oxide modulates  
901 low-Mg<sup>2+</sup>-induced epileptiform activity in rat hippocampal-entorhinal cortex slices. *Neurobiol Dis.*  
902 2002;

903 100. R Development Core Team 3.0.1. A Language and Environment for Statistical Computing. R  
904 *Found Stat Comput.* 2013;

905

906

907

908

909

910

911

912

913

914

915 **Figure legends**

916 **Figure 1. Intracellular human derived A $\beta$  oligomers (h-iA $\beta$ o) increased the synaptic**  
917 **transmission and AP spike firing in hippocampal neurons *in vitro*.** **a**, Western blot analysis of  
918 AD brain-derived A $\beta$  oligomers with A11 and generic A $\beta$  antibody 6E10. **b**, AFM image of AD brain-  
919 derived A $\beta$  oligomer. Scale bar 100 nm. **c**, Schematic representation of the synaptic recordings,  
920 showing the pre-synaptic (Pre-S) and post-synaptic (Post-S) compartment, and the use of the patch  
921 electrode to dialyze the cell with h-iA $\beta$ o and to record membrane currents (electrode do not  
922 represent actual size). **d**, Representative synaptic currents recordings (holding potential ( $V_h$ ) = -60  
923 mV). Bursts of synaptic currents (arrowheads) and spikes in current recording mode (arrows) are  
924 observed. **e-g**, Quantification of charge transferred (**e**) frequency (**f**) and amplitude (**g**) of post-  
925 synaptic currents. Bars represent the average  $\pm$  SEM for control (n=6), h-iA $\beta$ o 50 nM (n=7) and h-  
926 iA $\beta$ o 1000 nM (n=8) cells. One-Way Welch's ANOVA with Games-Howell post-hoc test for (**e**):  
927  $F(2,9.91)=24.04$ ,  $p=1.57E-4$ . p-values for post-hoc test: control vs. h-iA $\beta$ o 50 nM:  $5.68E-3$ , control  
928 vs. h-iA $\beta$ o 1000 nM:  $1.51E-9$  and h-iA $\beta$ o 50 nM vs. h-iA $\beta$ o 1000 nM:  $6.76E-3$ . One-Way Welch's  
929 ANOVA with Games-Howell post-hoc test for (**f**):  $F(2,10.69)=32.82$ ,  $p=2.73E-5$ . p-values for post-  
930 hoc test: control vs. h-iA $\beta$ o 50 nM:  $3.29E-2$ , control vs. h-iA $\beta$ o 1000 nM:  $1.17E-4$ , h-iA $\beta$ o 50 nM vs.  
931 h-iA $\beta$ o 1000 nM:  $3.80E-4$ . One-Way Welch's ANOVA with Games-Howell post-hoc test for (**g**):  
932  $F(2,11.09)=19.25$ ,  $p=2.47E-4$ . p-values for post-hoc test: control vs. h-iA $\beta$ o 1000 nM:  $6.94E-04$ , h-  
933 iA $\beta$ o 50 nM vs. h-iA $\beta$ o 1000 nM:  $4.67E-4$ . \* denotes  $p < 0.05$ , \*\*  $p < 0.005$ , \*\*\*  $p < 0.001$ .

934 **Figure 2. Effects of intracellular A $\beta$  oligomers on the frequency and amplitude of miniature**  
935 **post-synaptic currents.** **a**, Representative mPSCs traces after applying h-iA $\beta$ o 0.5  $\mu$ M ( $V_h$  = -60  
936 mV). **b, c**, mPSCs frequency (**b**) and amplitude (**c**) quantification for control (n=5 cells) and h-iA $\beta$ o  
937 500 nM (n=9 cells). **d**, mPSCs traces for control (n=16) and after applying increasing concentrations  
938 of synthetic iA $\beta$ o 0.5 nM (n=14), 5 nM (n=16), 50 nM (n=16), 500 nM (n=14) and 1000 nM (n=16  
939 cells). **e, f**, mPSCs frequency (**e**) and amplitude (**f**) for each of the conditions described in (**d**). Bar  
940 charts represent the average  $\pm$  SEM. Unpaired Student's t-test for (**b**) ( $t(12)=-5.845$ ,  $p=7.89E-05$ )  
941 and unpaired Student's t-test with Welch's correction for (**c**) ( $t(11.93)=-5.123$ ,  $p=2.56E-04$ ). One-  
942 Way Welch's ANOVA with Games-Howell post-hoc test for (**e**):  $F(5,86)=13.76$ ,  $p=7.15E-10$ . p-

943 values for post-hoc test:  $iA\beta o$  0 nM vs. 0.5 nM:  $4.57E-2$ ,  $iA\beta o$  0 nM vs. 5 nM:  $2.73E-4$ ,  $iA\beta o$  0 nM  
944 vs. 50 nM:  $2.33E-3$ ,  $iA\beta o$  0 nM vs. 500 nM:  $1.17E-4$ ,  $iA\beta o$  0 nM vs 1000 nM:  $3.11E-3$ . One-Way  
945 Welch's ANOVA with Games-Howell post-hoc test for (f):  $F(5,86)=3.73$ ,  $p=0.004$ . p-values for post-  
946 hoc test:  $iA\beta o$  0 nM vs. 1000 nM:  $2.01E-3$ . \* denotes  $p < 0.05$ , \*\*  $p < 0.005$  and \*\*\*  $p < 0.001$ .

947

948 **Figure 3. h- $iA\beta o$  induces a shift in excitatory/inhibitory (E/I) balance.** **a**, Spontaneous inhibitory  
949 (sIPSC) and excitatory (sEPSC) post-synaptic recordings obtained in absence (control) and  
950 presence of  $1 \mu M$  h- $iA\beta o$ . In this conditions, reverse potential for  $Cl^-$  was  $\approx -66$  mV, allowing us to  
951 record sEPSC at a  $V_h$  of  $-60$  mV and sIPSC at  $+10$  mV. Segmented lines show the maximum  
952 amplitude observed for sEPSC and sIPSC in control condition (Control  $I_{max}$ ). **b**, Charge transferred  
953 for sEPSC (E) (unpaired Student's t-test:  $t(11)=-2.75$ ,  $p=1.86E-2$ ), charge transferred for sIPSC (I)  
954 and E/I ratio for each condition (unpaired Student's t-test:  $t(11)=-2.73$ ,  $p=1.93E-2$ ), expressed as  
955 percentage of control condition. Bar charts represent the average  $\pm$  SEM for control ( $n=7$ ) and h-  
956  $iA\beta o$  ( $n=6$ ) cells. \* denotes  $p < 0.05$ .

957

958 **Figure 4.  $iA\beta o$  differentially affected AMPA-R and GABA<sub>A</sub>-R mediated miniature and evoked**  
959 **PSCs.** **a - d**, Pharmacologically isolated AMPA (**a**) and GABA (**c**) mPSCs in control condition and  
960 with  $iA\beta o$  500 nM at  $V_h = -60$  mV, showing the averaged synaptic current for each condition (**b** and  
961 **d**). **e, f**, mEPSC ( $n=9$ ) and mIPSC ( $n=8$ ) frequency (**e**) and amplitude quantification (**f**) for control  
962 and  $iA\beta o$ -treated cells. **g, h**, AMPA (**g**) and GABA (**h**) evoked currents in the absence ( $n=9$ ) and  
963 presence of  $iA\beta o$   $1 \mu M$  ( $n=9$ ). Segmented lines indicate maximum current reached ( $I_{MAX}$ ). **i**,  
964 Normalized evoked current amplitude (value corresponding to  $I_{MAX}$ ) for AMPA and GABA receptors.  
965 Bar charts represent the average  $\pm$  SEM. Unpaired Student's t-test with Welch's correction for  
966 mEPSC frequency:  $t(8.29)=-8.07$ ,  $p=3.31E-5$  and unpaired Student's t-test for mIPSC frequency:  
967  $t(14)=-7.43$ ,  $p=3.20E-6$ . Unpaired Student's t-test for mEPSC amplitude:  $t(16)=-2.62$ ,  $p=0.018$  and  
968 mIPSC amplitude:  $t(14)=-1.86$ ,  $p=0.086$ . Unpaired Student's t-test with Welch's correction for (**i**)  
969 AMPA-R:  $t(16)=-3.83$ ,  $p=1.4E-3$  and GABA<sub>A</sub>-R:  $t(16)=0.17$ ,  $p=0.863$ . \* denotes  $p < 0.05$ , \*\*  $p < 0.005$   
970 and \*\*\*  $p < 0.001$ .

971 **Figure 5. The effect of iA $\beta$ o on AMPAergic miniature and evoked EPSCs is PKC dependent.**

972 **a**, mEPSCs recordings obtained for control (n=11), iA $\beta$ o 500 nM (n=11), chelerythrine (CLR) 2.5  
973  $\mu$ M + iA $\beta$ o 500 nM (n=12) and CLR 2.5  $\mu$ M (n=12) ( $V_h$  = -60 mV). **b, c**, mEPSC frequency (**b**) and  
974 amplitude quantification (**c**) for each of the conditions described in (**a**). **d**, AMPA evoked current in  
975 the absence (n=9) and presence of iA $\beta$ o 1000 nM (n=9), iA $\beta$ o co-applied together with CLR (n=11)  
976 and CLR (n=11) ( $V_h$  = -60 mV). Segmented lines indicate maximum current reached ( $I_{MAX}$ ). **e**,  
977 Average amplitude of AMPA evoked current for each condition in (**d**). Bar charts represent the  
978 average  $\pm$  SEM. One-Way Welch's ANOVA with Games-Howell post-hoc test for (**b**):  $F(3,42)=6.11$ ,  
979  $p=0.002$ . p-values for post-hoc test: control vs iA $\beta$ o:  $2.27E-2$ , iA $\beta$ o vs. iA $\beta$ o + CLR:  $1.78E-2$ , iA $\beta$ o  
980 vs. CLR:  $2.07E-3$ . One-Way Welch's ANOVA with Games-Howell post-hoc test for (**c**):  
981  $F(3,42)=8.54$ ,  $p=1.52E-4$ . p-values for post-hoc test: control vs. iA $\beta$ o:  $2.65E-4$ , iA $\beta$ o vs. CLR:  
982  $1.23E-2$ , iA $\beta$ o vs. iA $\beta$ o + CLR:  $9.49E-4$ . One-Way Welch's ANOVA with Games-Howell post-hoc  
983 test for (**e**):  $F(3,35)=5.88$ ,  $p=2.31E-3$ . p-values for post-hoc test: control vs. iA $\beta$ o:  $3.31E-3$ , iA $\beta$ o vs.  
984 CLR:  $1.10E-2$ , iA $\beta$ o vs. iA $\beta$ o + CLR:  $1.49E-2$ . \* denotes  $p < 0.05$ , \*\*  $p < 0.005$  and \*\*\*  $p < 0.001$ .

985

986 **Figure 6. Nitric oxide synthase is important the effects of iA $\beta$ o on the frequency of miniature**

987 **synaptic currents in the neuronal ensemble. a**, Micrograph showing the area of the culture in  
988 which mPSCs were obtained from the recorded neuron (RN), as well as the NO-fluorescence for  
989 RN and of the neighboring neurons to RN (NN). **b, c**, Representative recordings (**b**) and  
990 quantification of mPSCs frequency (**c**) obtained during the course of 20 minutes in absence  
991 (control) and presence of iA $\beta$ o 200 nM, together with the pre-incubation with L-NAME (200  $\mu$ M for  
992 20-30 min) ( $V_h$  = -60 mV). **d**, Quantification of mPSCs frequency at 20 min (obtained from data  
993 marked inside gray rectangle from plot in **c**). **e - h**, Relative levels of NO (expressed as normalized  
994 fluorescence) obtained throughout the course of the experiment and at 20' for RN (**e** and **f**,  
995 respectively) and NN (**g** and **h**, respectively). Line and bar graphs represent the average  $\pm$  SEM.  
996 Control (n=9), L-NAME (n=8), iA $\beta$ o (n=11) and iA $\beta$ o + L-NAME (n=10) for RN and control (n=97),  
997 L-NAME (n=102), iA $\beta$ o (n=119) and iA $\beta$ o + L-NAME (n=102) for NN. One-Way Welch's ANOVA  
998 with Games-Howell post-hoc test for (**d**):  $F(3,34)=60.309$ ,  $p=1.07E-13$ . p-values for post hoc test:



999 Control vs. iA $\beta$ o: 1.06E-08, L-NAME vs. iA $\beta$ o + L-NAME: 7.80E-3, iA $\beta$ o vs. iA $\beta$ o + L-NAME: 1.40E-  
1000 08. One-Way Welch's ANOVA with Games-Howell post-hoc test for (f): F(3,34)=21.926, p=4.41E-  
1001 8. p-values for post hoc test: Control vs. iA $\beta$ o: 2.53E-05, L-NAME vs. iA $\beta$ o + L-NAME: 3.03E-3,  
1002 iA $\beta$ o vs. iA $\beta$ o + L-NAME: 1.18E-03. One-Way Welch's ANOVA with Games-Howell post-hoc test  
1003 for (h): F(3,416)=40.763, p=4.11E-23. p-values for post hoc test: Control vs. iA $\beta$ o: 6.44E-20, L-  
1004 NAME vs. iA $\beta$ o + L-NAME: 2.16E-3, iA $\beta$ o vs. iA $\beta$ o + L-NAME: 8.85E-09. \*\* denotes p <0.005, \*\*\*  
1005 p <0.001.

1006 **Figure 7. iA $\beta$ o increased the firing of action potentials evoked by current injection in**  
1007 **hippocampal neurons *in vivo*.** **a**, Scheme representing the location of the electrode filled with  
1008 iA $\beta$ o to record action potentials in the pyramidal cell layer of CA1 (PY) of rat hippocampus  
1009 (highlighted in green) (brain image obtained from Allen Institute Brain Atlas). **b**, Representative  
1010 action potential recordings in absence and presence of 500  $\mu$ M iA $\beta$ o. **c**, Relationship between the  
1011 number of evoked action potentials and the injected current intensity for the experimental conditions  
1012 described in **b** (two-way ANOVA: F(7,103)=7.983, p=1.01E-7). **d**, Quantification of the rheobase  
1013 constant (unpaired Student's t-test: t(14)=4.188, p=9.11E-4). **e**, Representative recordings  
1014 obtained without injection of depolarizing current pulses after stabilizing the resting membrane  
1015 potential (RMP) to -70 mV. **f**, Vm values histogram and average values of Vm  $\pm$  SEM. **g**, **h**,  
1016 Quantification of standard deviation (SD) values for Vm (**g**) (unpaired Student's t-test: t(14)=-3.445,  
1017 p=3.94E-3) and spontaneous AP firing frequency (**h**) (Mann-Whitney U-test: U=0, z-score=-3.199,  
1018 p=1.38E-3). **i**, Epifluorescence micrographs of coronal cuts obtained after the electrophysiological  
1019 recording, showing a positive staining for calbindina-D28k (in green, **i**<sub>1</sub>) and streptavidin (in red, **i**<sub>2</sub>),  
1020 in hippocampus-CA1. The recorded neuron (**i**<sub>3</sub>) is also observed. DG, dentate gyrus; PY, pyramidal  
1021 cell layer of CA1; RAD, stratum radiatum. **j**, Confocal micrographs, demonstrating the positive  
1022 staining for streptavidin in the recorded neuron (in red, **j**<sub>2</sub>) as well as the merge with calbindina-  
1023 D28k (**j**<sub>3</sub>) within the stratum pyramidale of the CA1 region of the hippocampus. Bar and line charts  
1024 represent the average  $\pm$  SEM for control (n=10) and h-iA $\beta$ o (n=6) cells of at least 6 rats. \*\* denotes  
1025 p <0.005, \*\*\* p <0.001.

1026

1027 **Figure 8. Intracellular human derived A $\beta$  oligomers (h-iA $\beta$ ) increased the firing of action**  
1028 **potentials in hippocampal neurons *in vitro*.** **a**, Hippocampal neuron action potential (AP)  
1029 recordings in the absence and presence of 500 nM h-iA $\beta$ . **b**, Relationship between the number of  
1030 AP spikes and the injected current intensity for the experimental conditions described previously  
1031 (two-way ANOVA:  $F(8,79)=9.077$ ,  $p=9.31E-9$ ). **c**, Rheobase constant decreased  $\approx 45\%$  for h-iA $\beta$   
1032 condition (unpaired Student's t-test:  $t(9)=2.737$ ,  $p=2.29E-2$ ). Bars and line charts represent the  
1033 average  $\pm$  SEM for control (n=6) and h-iA $\beta$  (n=5) cells. \* denotes  $p < 0.05$ , \*\*\*  $p < 0.001$ .

1034

1035 **Figure 9. Intracellular blockade of voltage-regulated Na $_v$  channels does not prevent**  
1036 **depolarization of the membrane activated by h-iA $\beta$ .** **a**, Representative recordings obtained  
1037 without current injection, showing membrane potential (Vm) fluctuations under the different  
1038 conditions tested. External application of CNQX 20  $\mu$ M inhibited the fluctuations at great extent in  
1039 all conditions. **b**, Histogram showing the distribution of Vm values in the different experimental  
1040 conditions shown in **a**, along with the Vm SD (inset bar graph) One-Way Welch's ANOVA with  
1041 Games-Howell post-hoc test for:  $F(3,19)=11.299$ ,  $p=1.77E-4$ . p-values for post hoc test: Control vs.  
1042 iA $\beta$ :  $7.13E-3$  and QX-314 vs. QX-314 + iA $\beta$ :  $2.12E-3$ ). **c**, Current injection experiments  
1043 demonstrating that, under the control and h-iA $\beta$  conditions, the generation of action potentials was  
1044 not inhibited, while Na $_v$  intracellular block by QX-314 prevented spiking of neurons with h-iA $\beta$  and  
1045 without it. Arrowheads over 3th trace (left-to-right direction) indicate the presence of depolarizing  
1046 post-synaptic potentials when h-iA $\beta$  was present. This did not occurred for the condition with QX-  
1047 314 alone (4th trace; left-to-right direction). Bars represent the average  $\pm$  SEM for control (n=6), h-  
1048 iA $\beta$  (n=5), h-iA $\beta$ +QX-314 (n=6) and QX-314 (n=6) cells. \* denotes  $p < 0.05$ , \*\*  $p < 0.005$  and \*\*\*  
1049  $p < 0.001$ .

1050

1051 **Figure 10. Scheme depicting the effects of intracellular effects of A $\beta$  on neurotransmission**  
1052 **and neuronal excitability.** Schematic summary of iA $\beta$  actions at the pre- and post-synaptic  
1053 levels, highlighting a synaptic and a circuit component. At synaptic level, being present in the post-  
1054 synaptic compartment activates PKC (**a**), which in turn mediates the activation of nitric oxide

1055 synthase (NOS). This triggers the production of nitric oxide (NO) at the post-synaptic level, which,  
1056 through a retrograde mechanism, activates an increase in the release of neurotransmitters from  
1057 the pre-synaptic compartment (**b**). These activate the post-synaptic receptors AMPAR (pink) and  
1058 GABA (in green), which was globally evidenced as an increase in the frequency of GABAergic and  
1059 AMPAergic mPSCs, respectively. Additionally, PKC present in the post-synapse increases the  
1060 AMPA receptor current (**c**), increasing post-synaptic depolarization, facilitating the approach of  $V_m$   
1061 to the threshold and generating action potentials more easily. This directly affects the neuronal  
1062 function, increasing the excitability of the cell (**d**). Finally, at the circuit level,  $iA\beta_o$  in the recorded  
1063 neuron increased synchronization NO production in nearby neurons that don't have  $iA\beta_o$ , a  
1064 phenomenon we named as "functional spreading" (**e**).  
1065

## AD brain-derived A $\beta$ oligomers

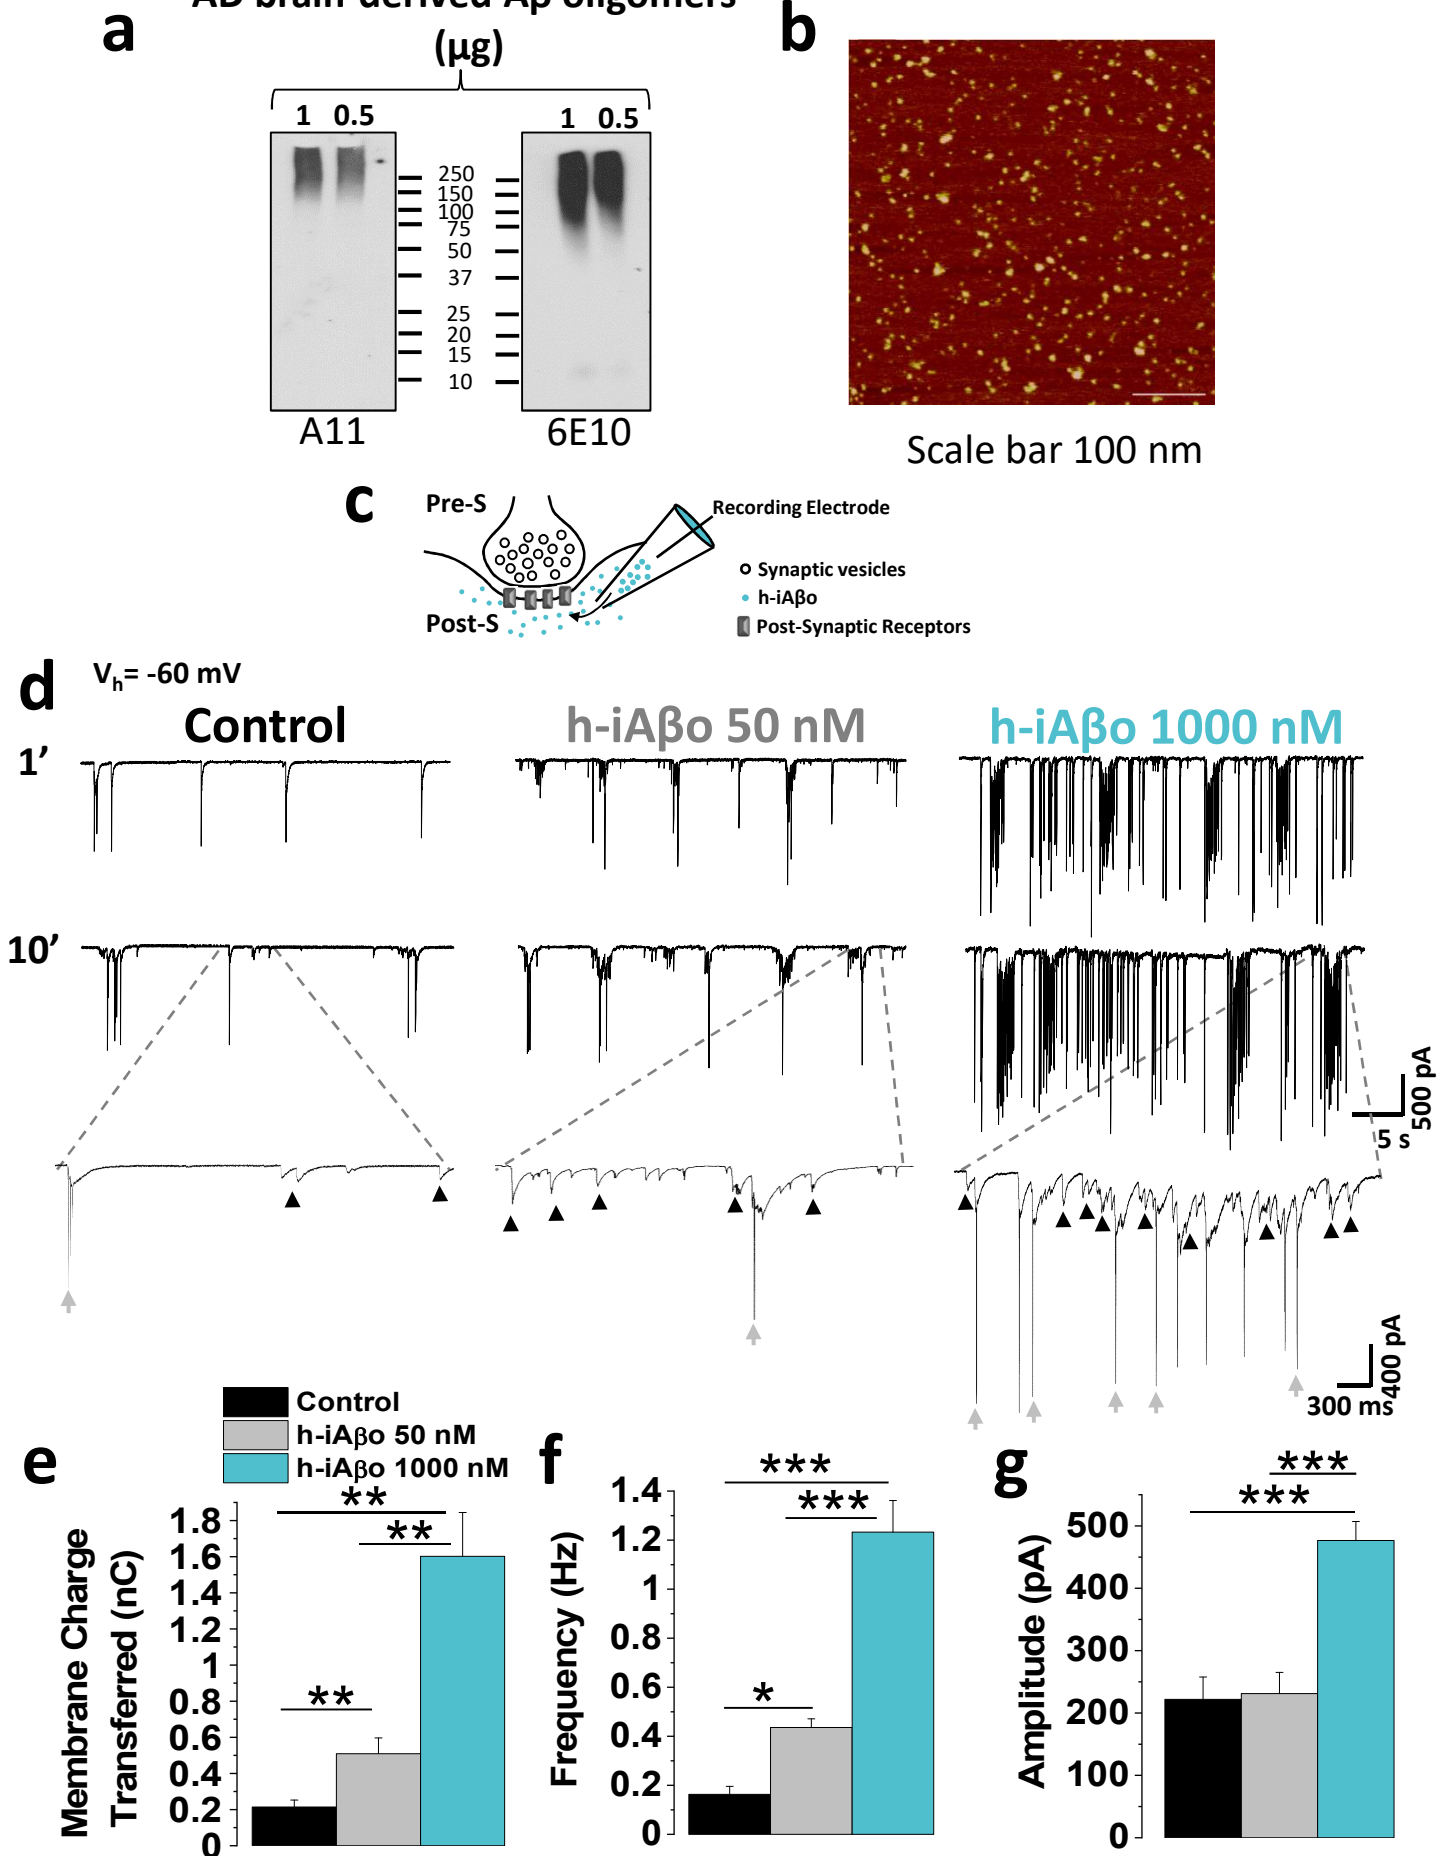

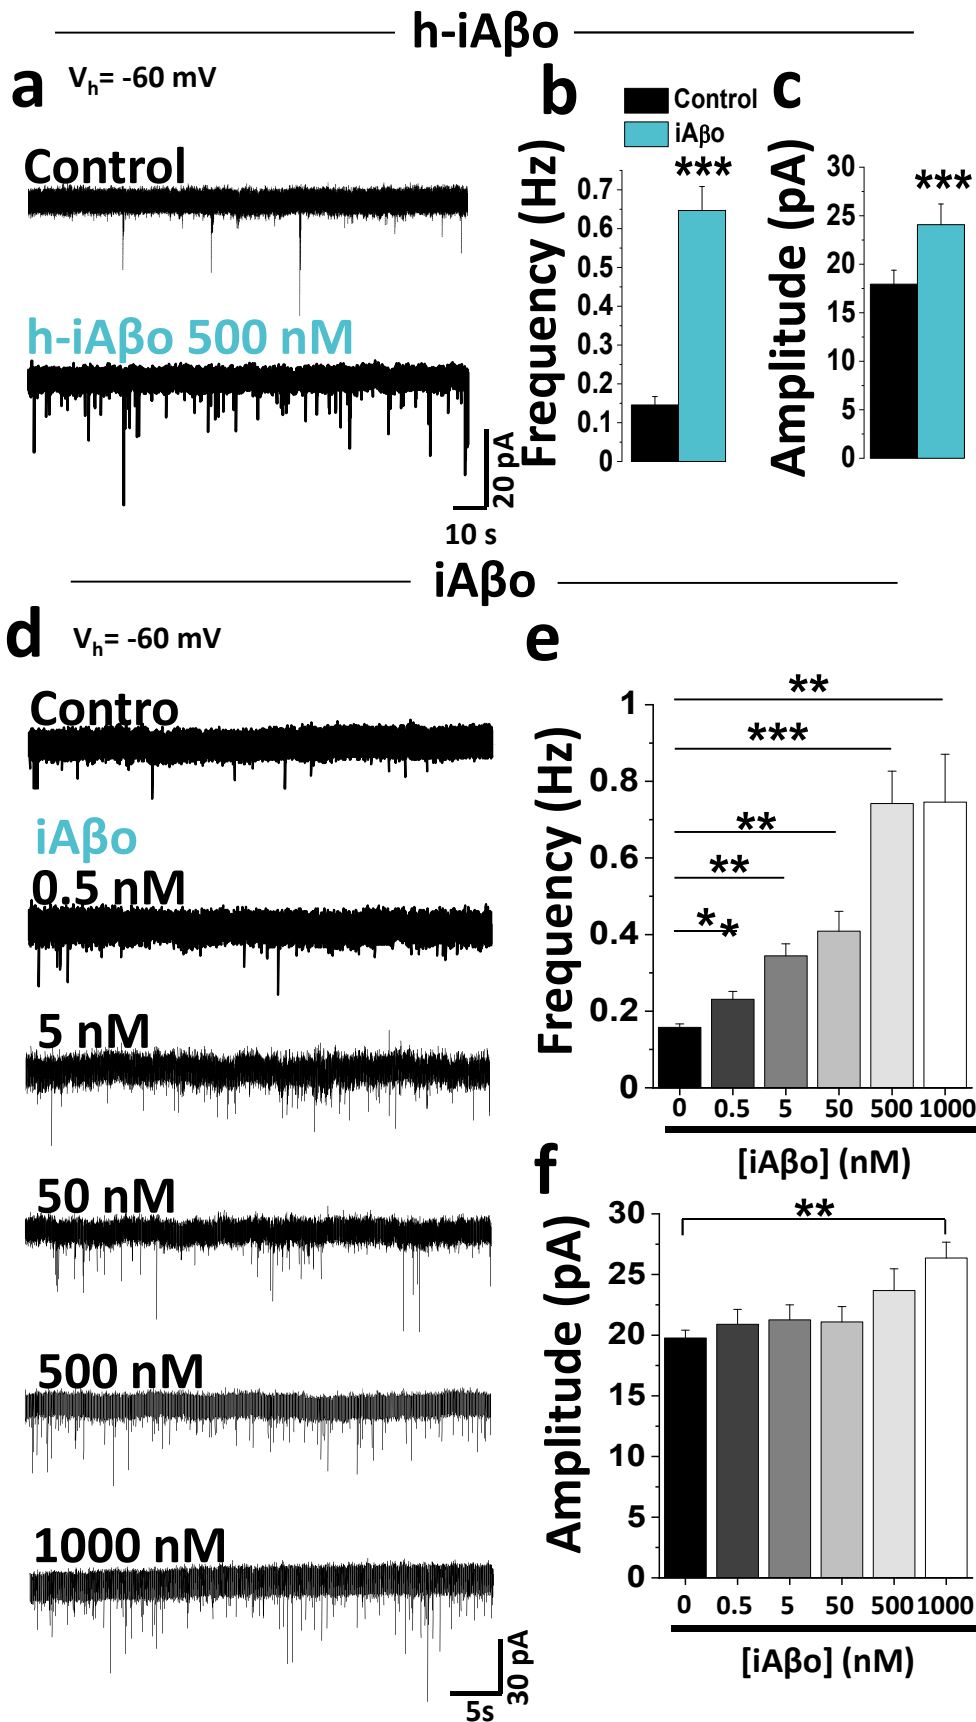

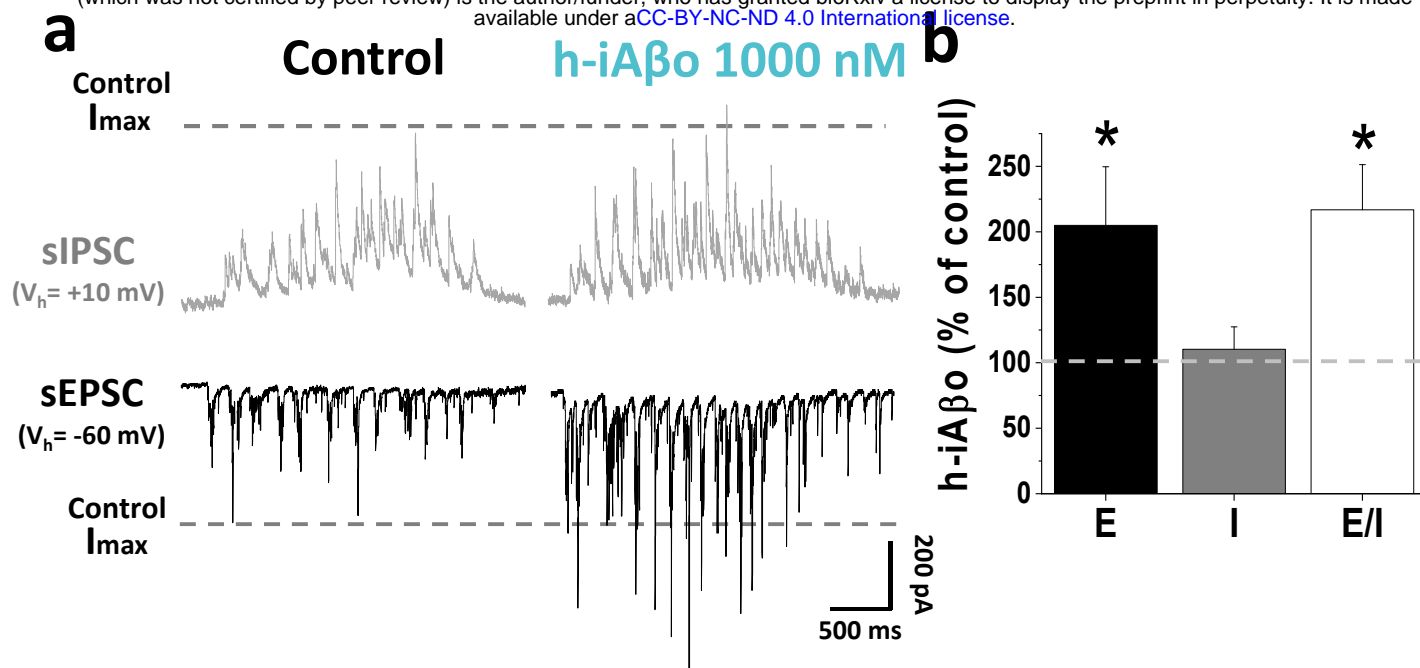

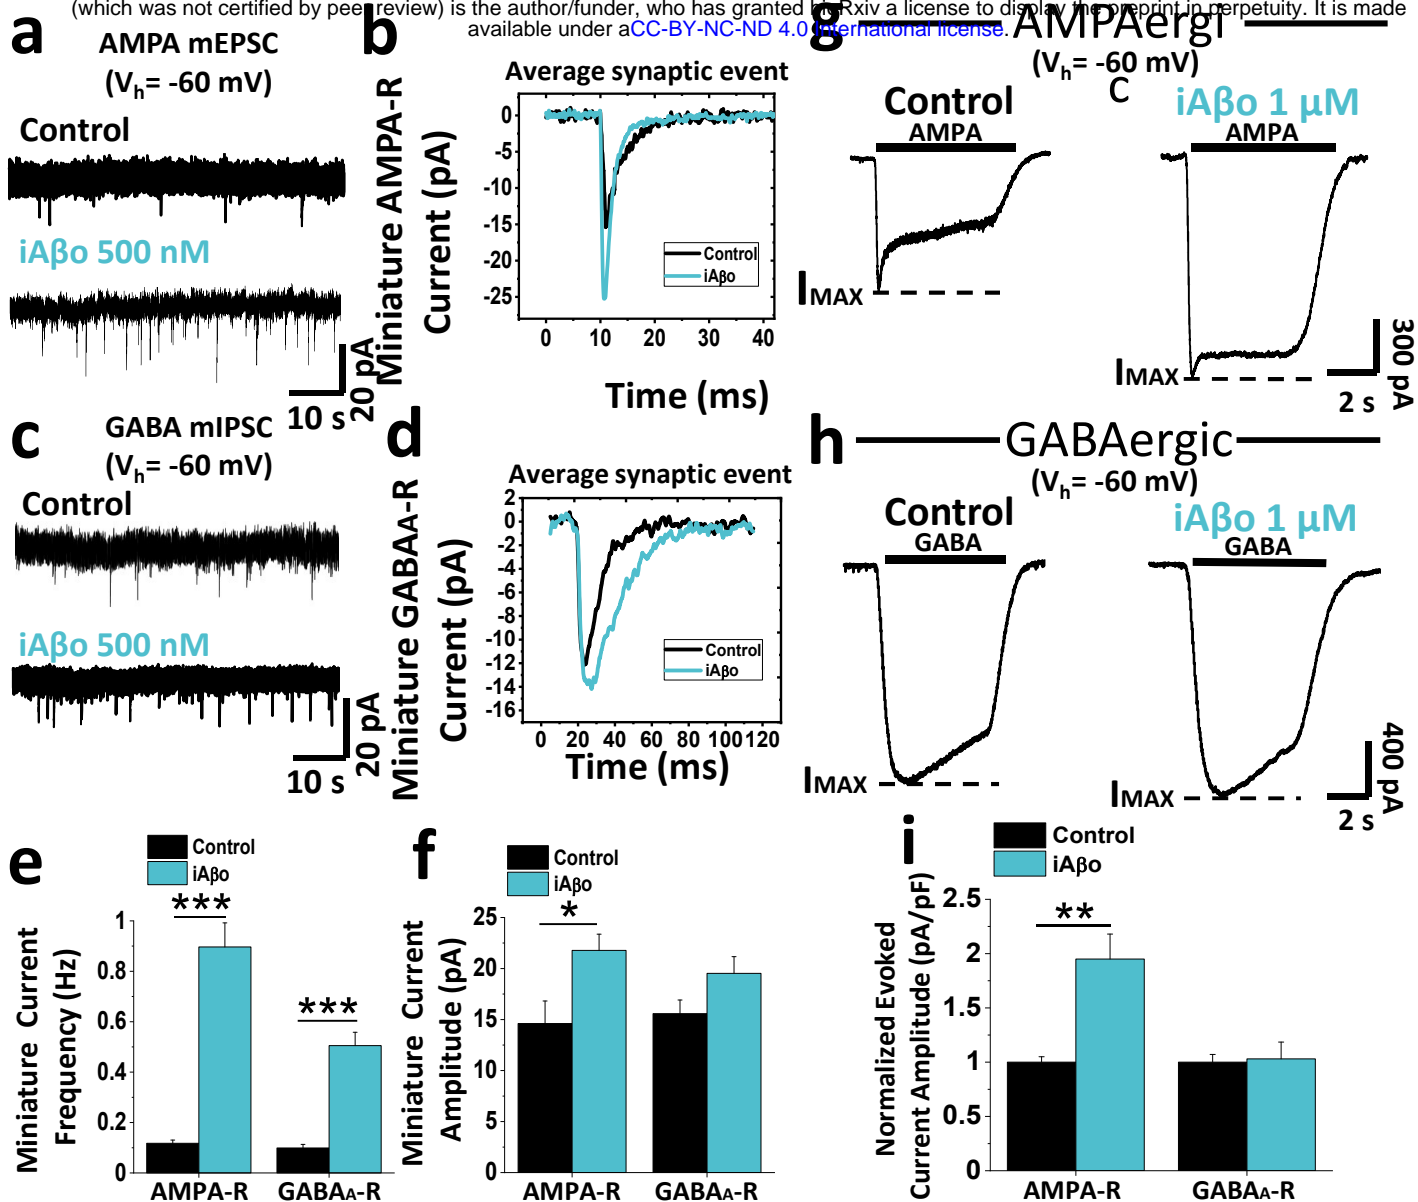

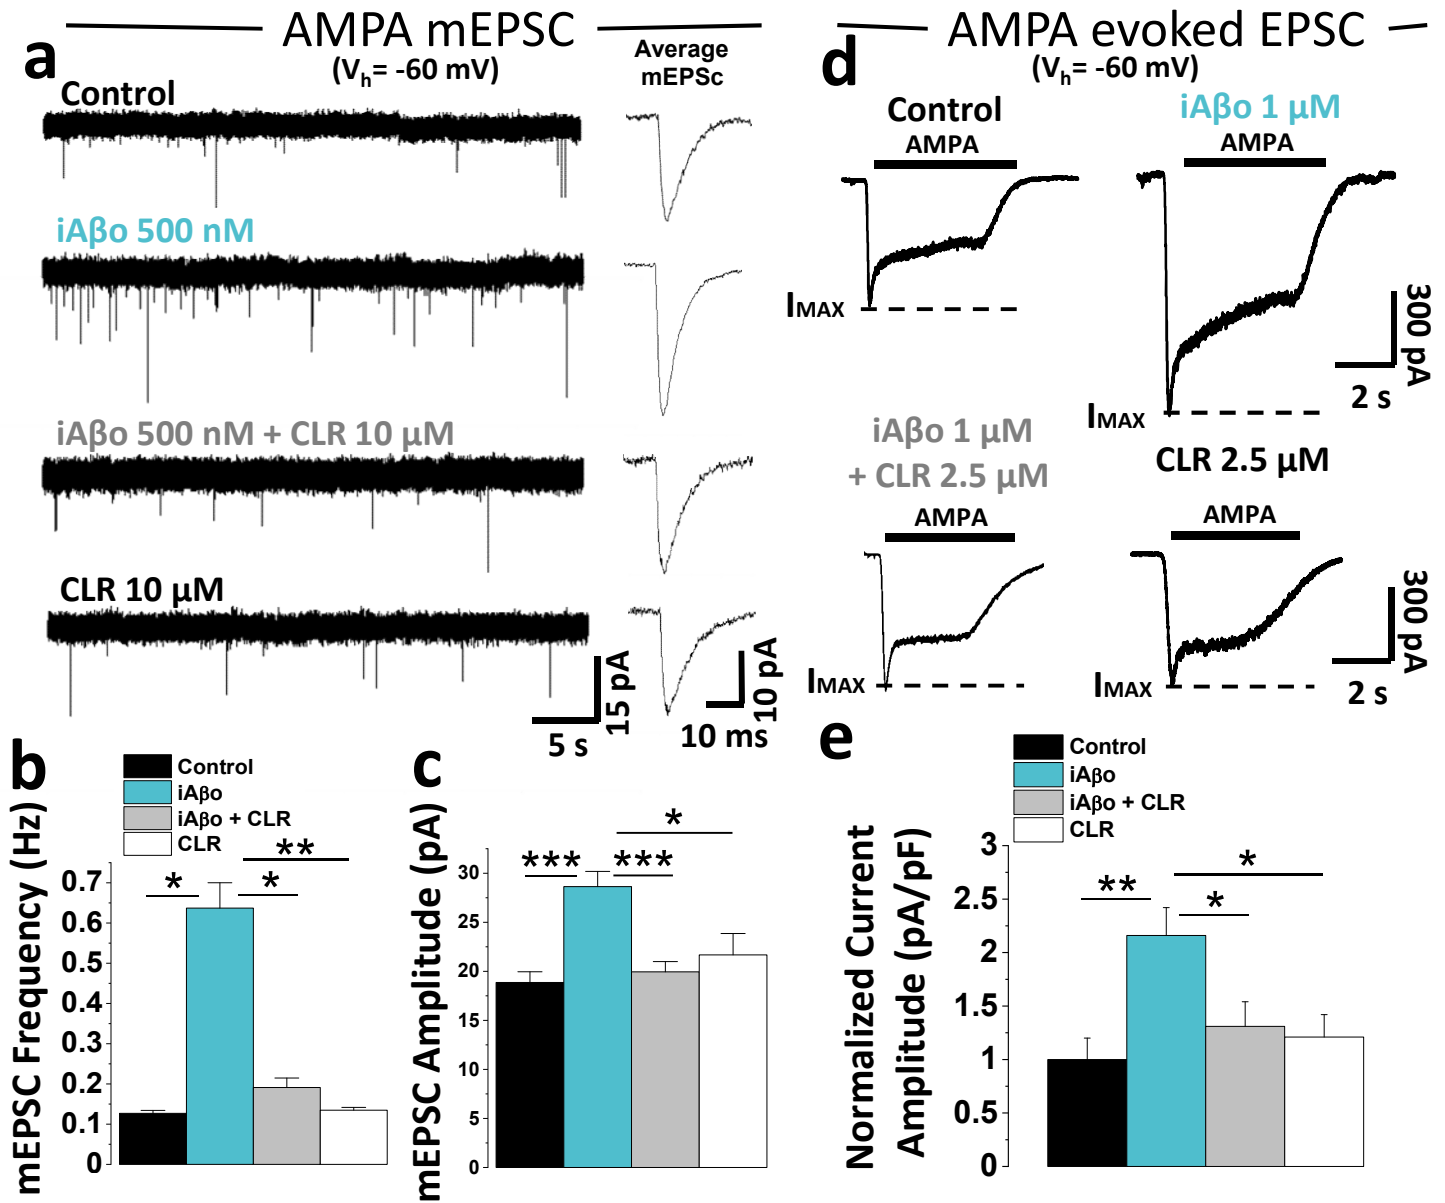



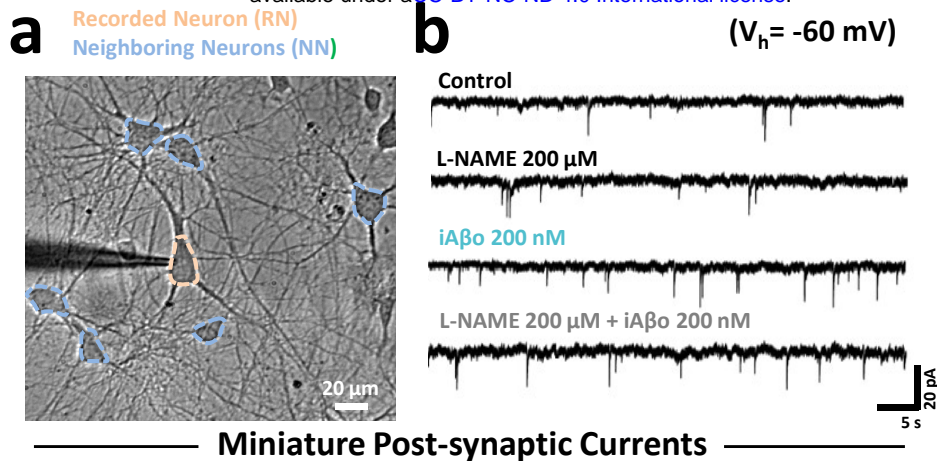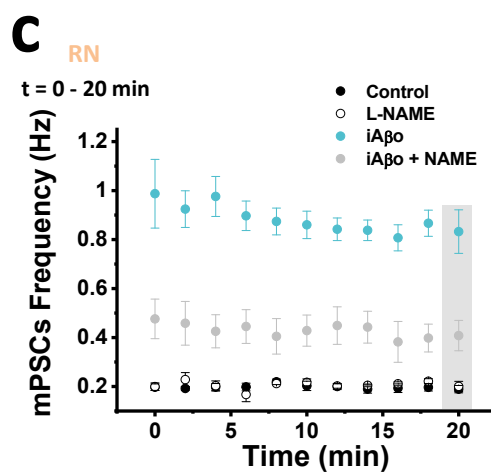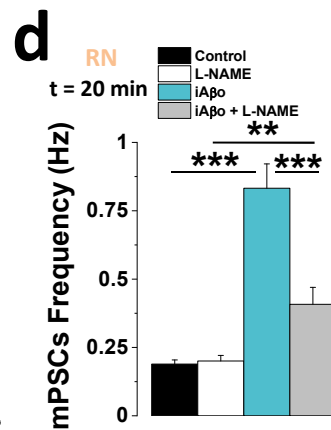

NO fluorescence measurements

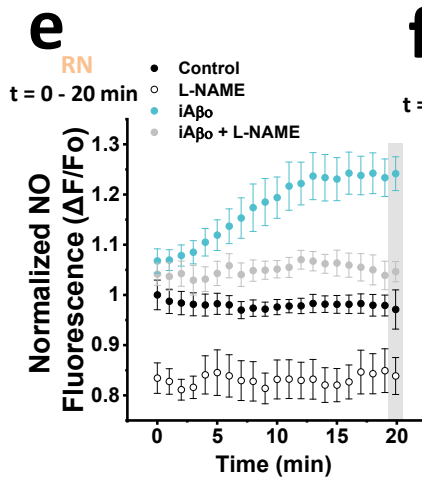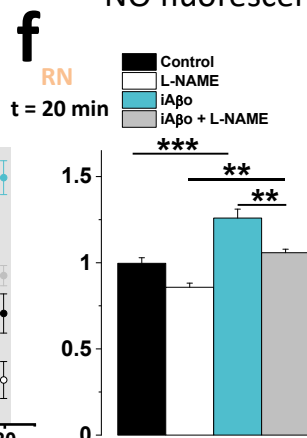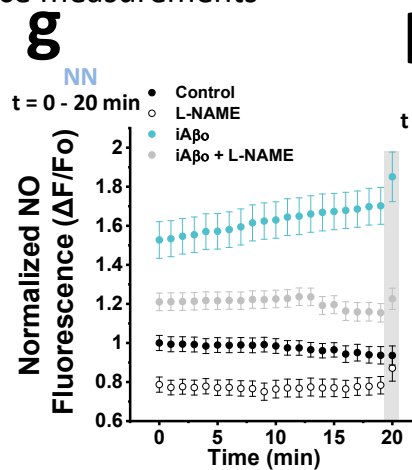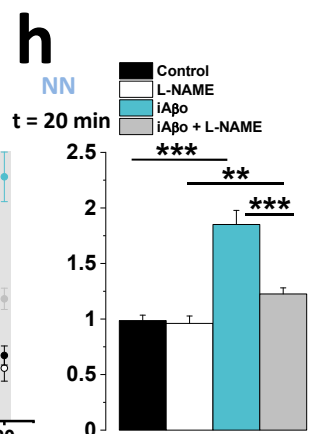

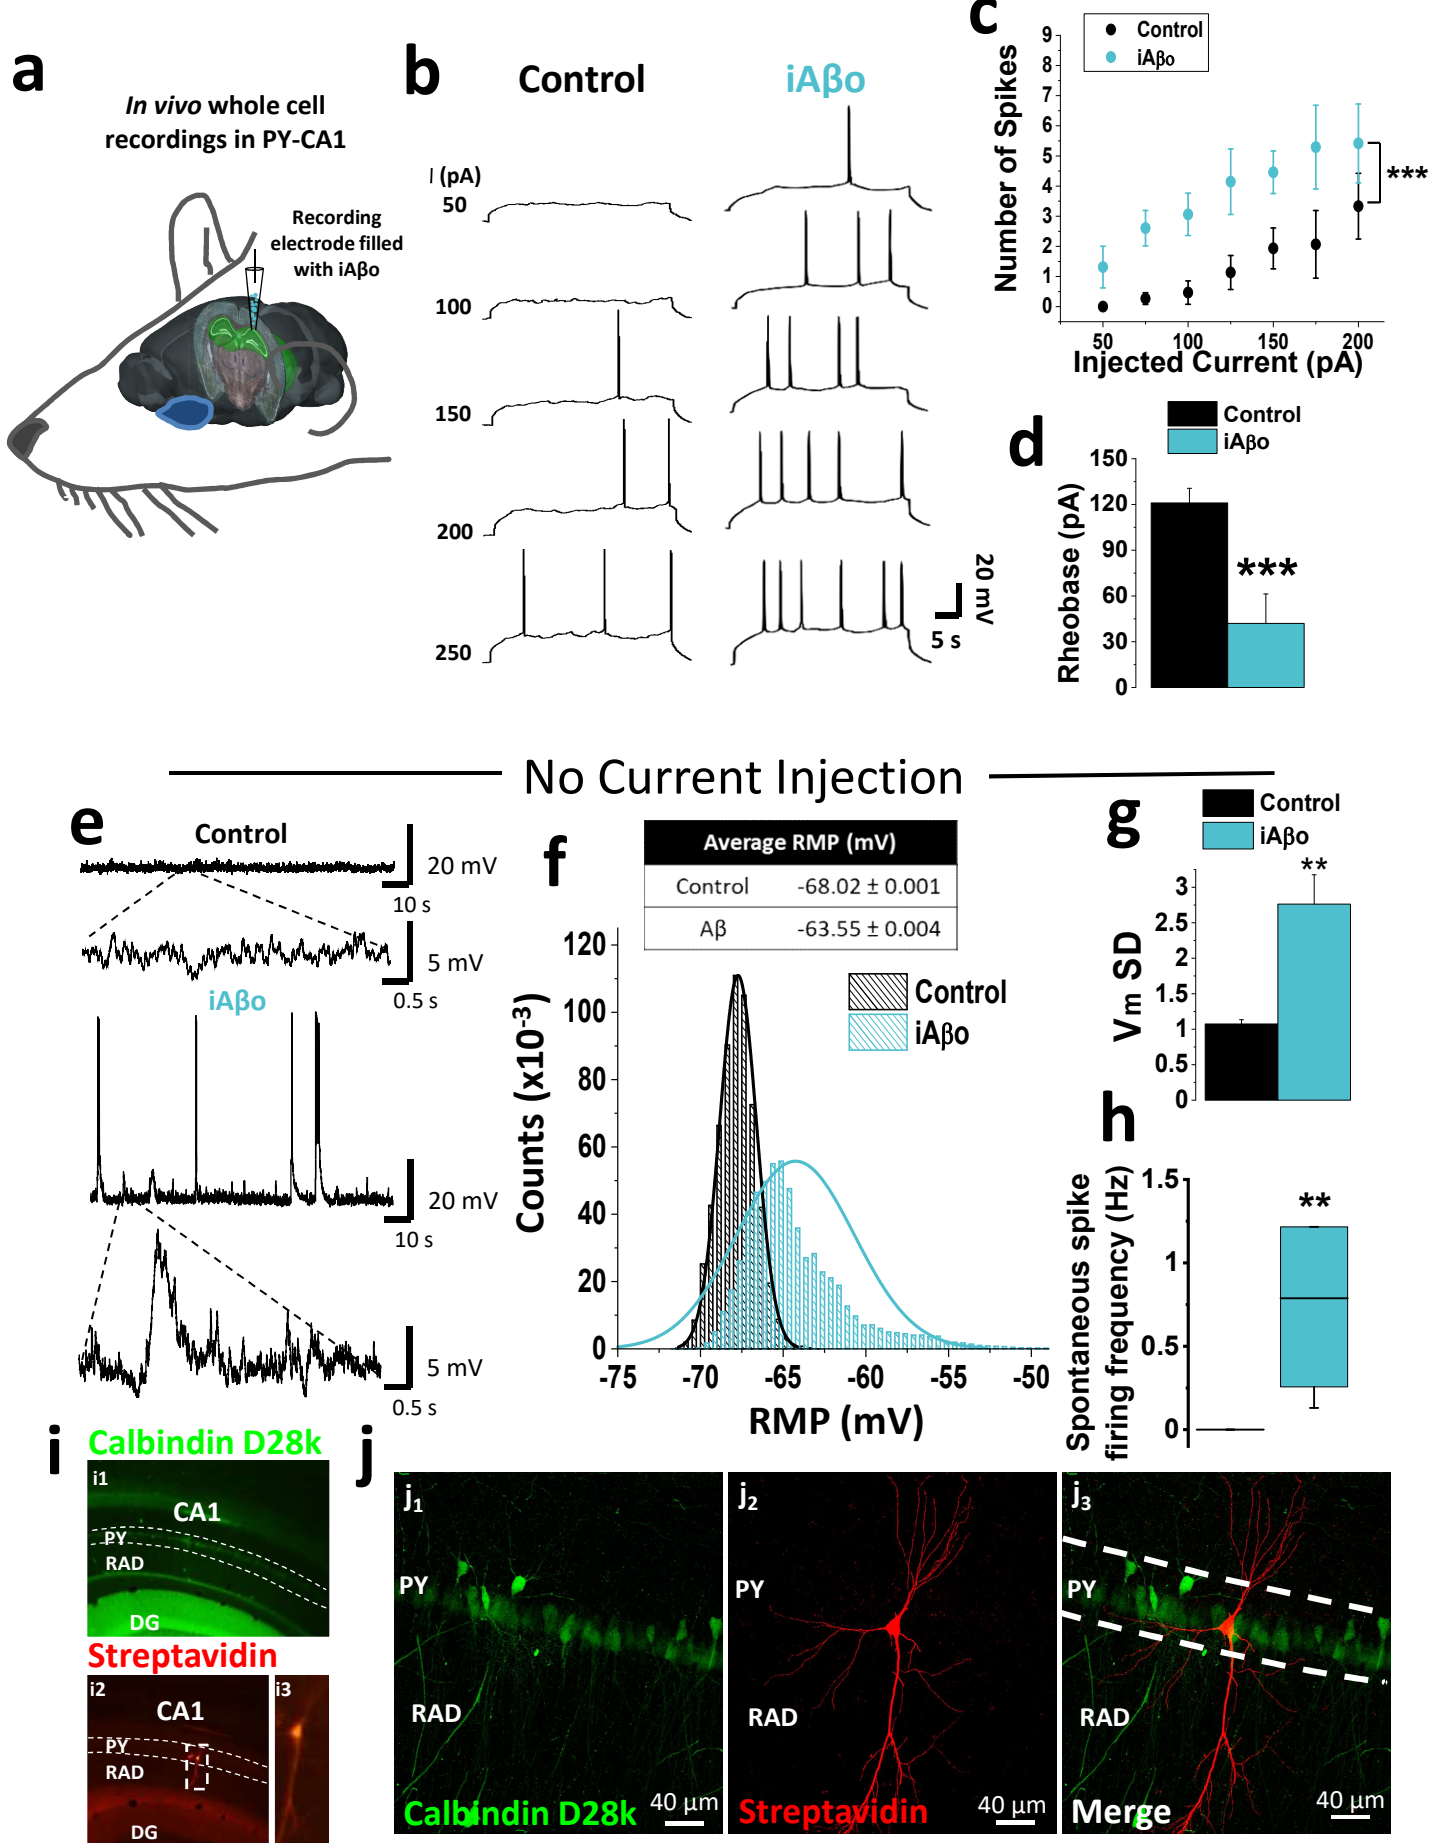

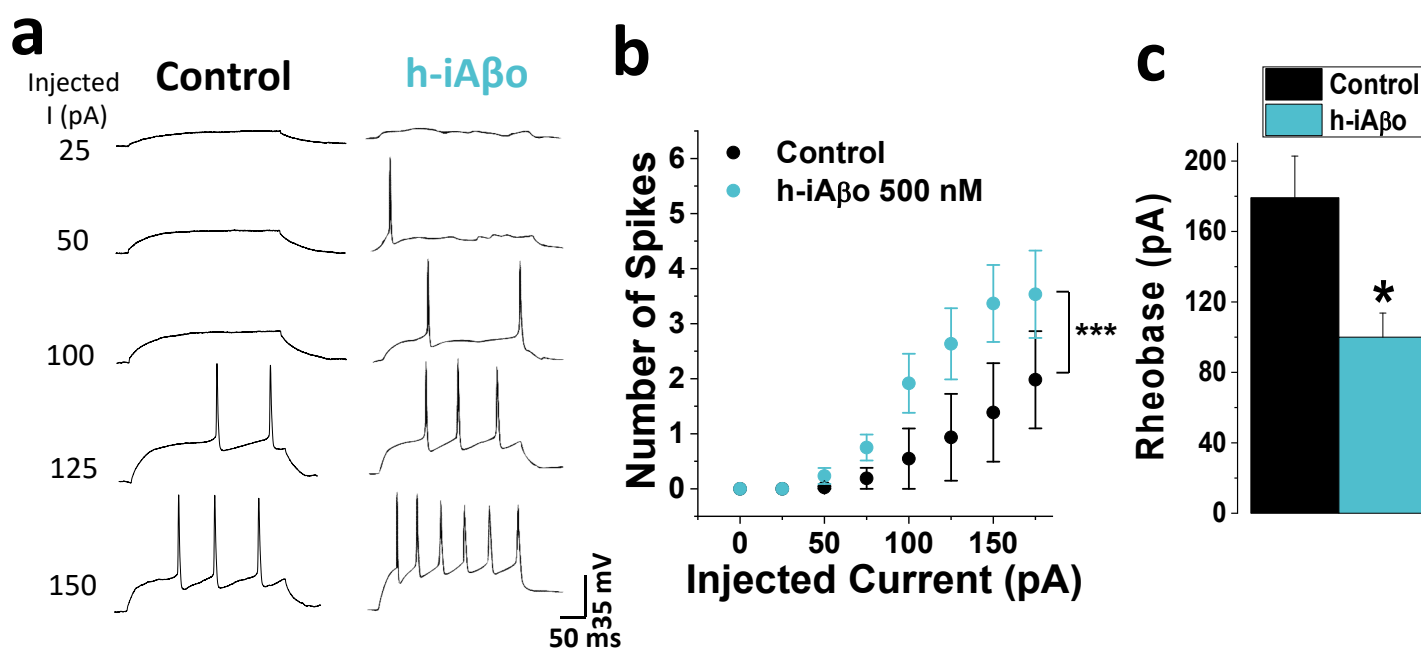

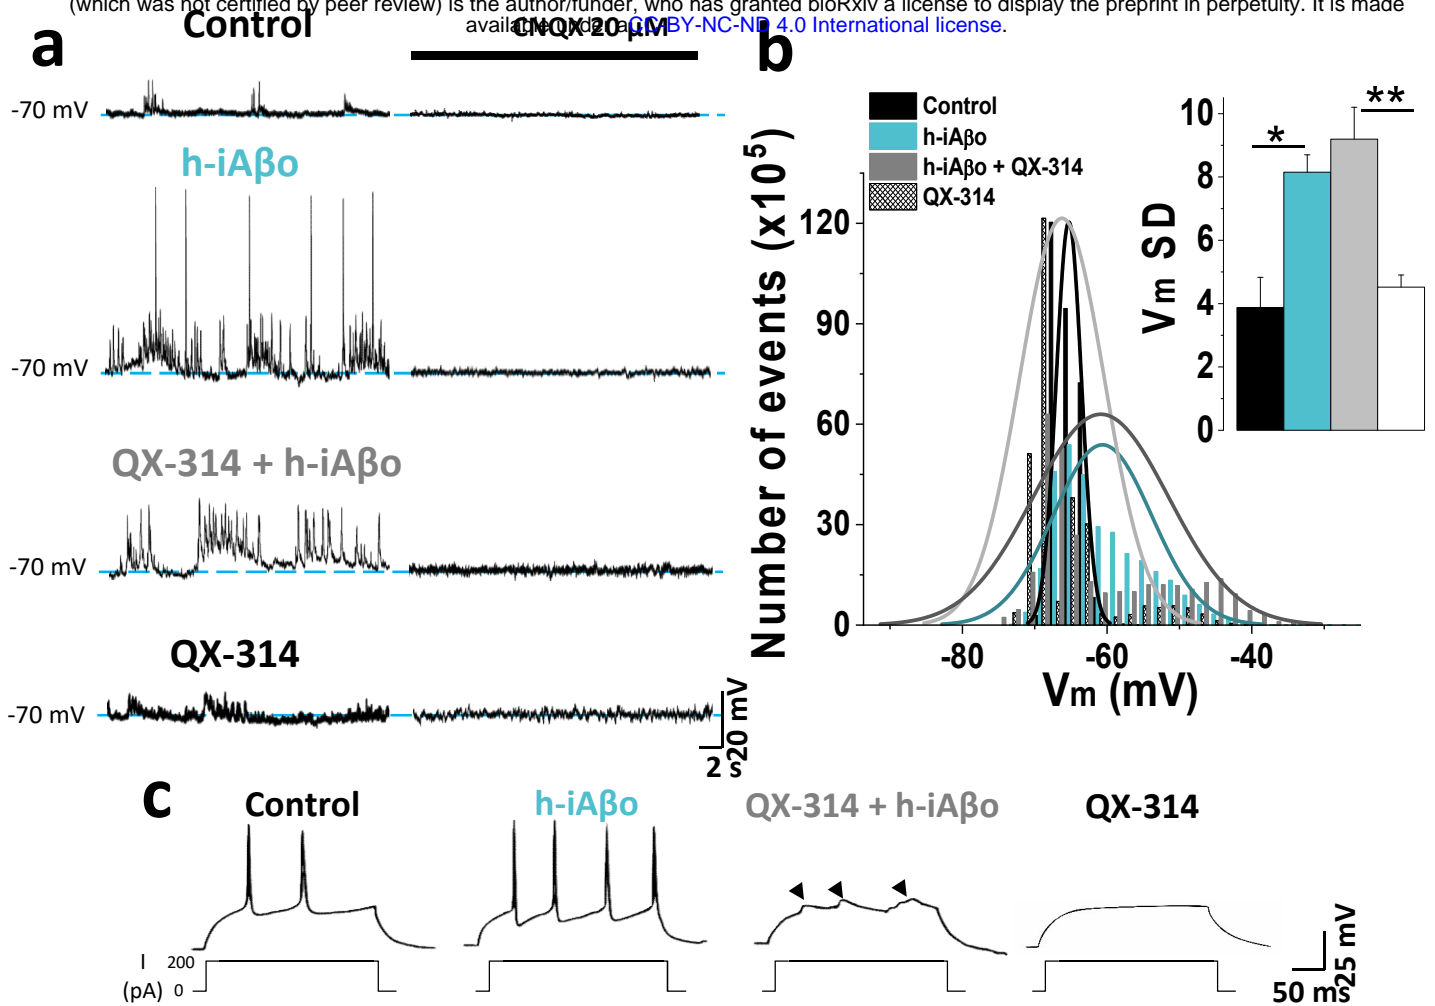

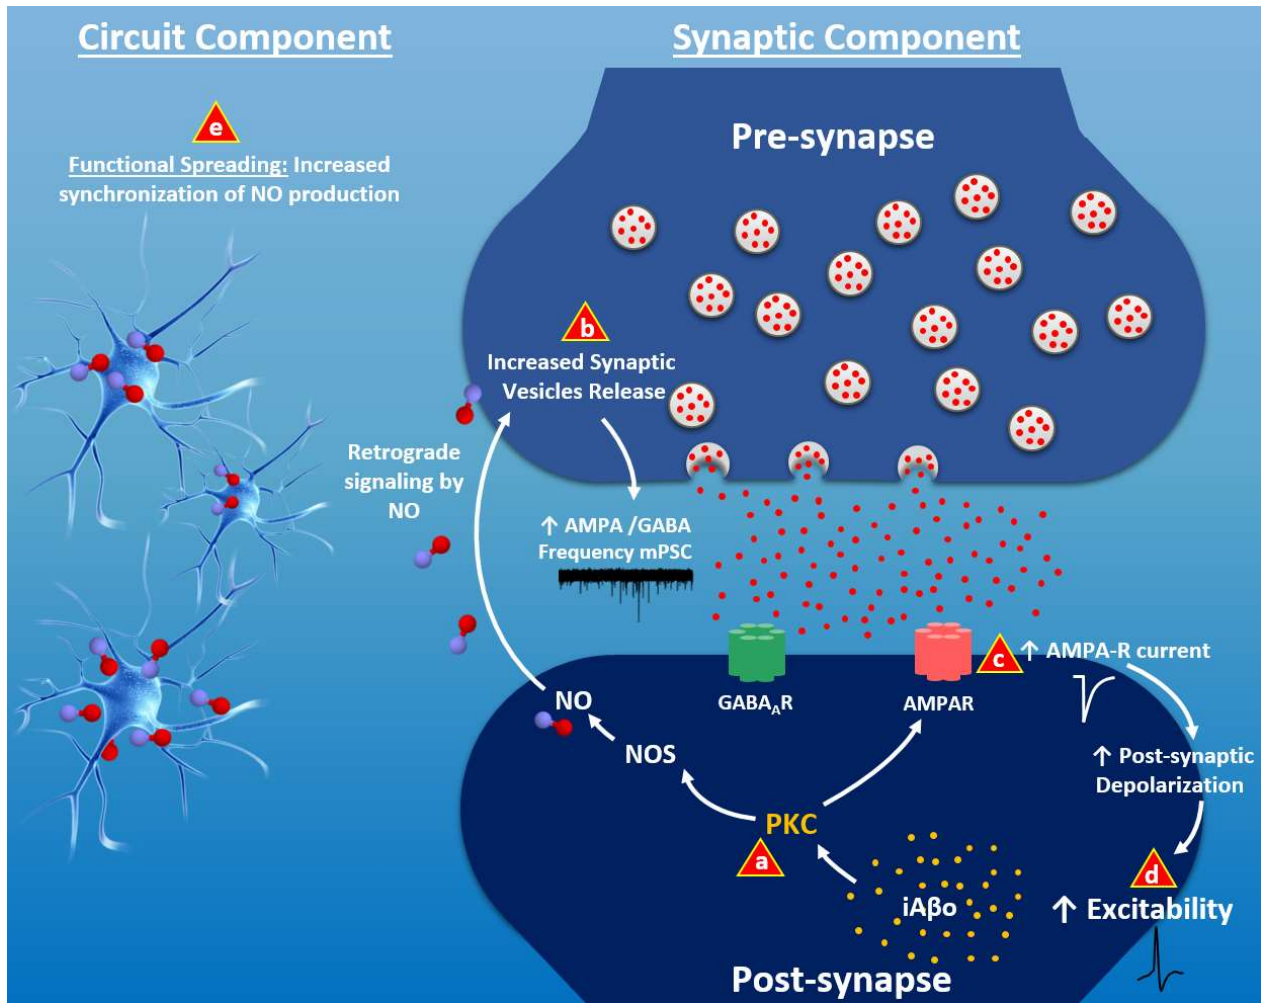

Source: https://www.biorxiv.org/content/10.1101/2020.10.16.332445v1.full.pdf
