# Supplementary material for: Functional spreading of hyperexcitability induced by human and synthetic intracellular Aβ oligomers
Source: bioRxiv or medRxiv preprint supplement (doi:10.1101/2020.10.16.332445), 2020-10-17
Supplement: Supplementary file [file media-1.pdf]

1 Supplementary Information for

2

3 Functional spreading of hyperexcitability induced by human and synthetic intracellular A $\beta$

4 oligomers

5

6 Eduardo J. Fernandez-Perez<sup>1</sup>, Braulio Muñoz<sup>1</sup>, Denisse A. Bascuñan<sup>1</sup>, Christian Peters<sup>1</sup>, Nicolas

7 O. Riffo Lepe<sup>1</sup>, Maria P. Espinoza<sup>1</sup>, Peter J. Morgan<sup>2</sup>, Caroline Filippi<sup>2</sup>, Romain Bourbonlou<sup>2</sup>, Urmi

8 Sengupta<sup>3,4</sup>, Rakez Kayed<sup>3,4</sup>, Jérôme Epsztein<sup>2</sup>, Luis G. Aguayo<sup>1,\*</sup>.

9

10 <sup>1</sup> Laboratory of Neurophysiology, Department of Physiology, Universidad de Concepción, Barrio

11 Universitario s/n P. O. Box 160-C, Concepción, Chile. Fernandez-Pérez EJ email:

12 [edfernandez@udec.cl](mailto:edfernandez@udec.cl), Muñoz B email: [brauliomunoz@udec.cl](mailto:brauliomunoz@udec.cl), Bascuñan Muñoz DA email:

13 [denisse.bascunan.m@gmail.com](mailto:denisse.bascunan.m@gmail.com), Peters C email: [cpeters@udec.cl](mailto:cpeters@udec.cl), Espinoza MP email:

14 [marespinozam@udec.cl](mailto:marespinozam@udec.cl), Riffo Lepe NO email: [nriffo@udec.cl](mailto:nriffo@udec.cl)

15 <sup>2</sup> Institute of Neurobiology of the Mediterranean Sea (INMED), Marseille, France. Morgan P email:

16 [peter.morgan@inserm.fr](mailto:peter.morgan@inserm.fr), Filippi C email: [caroline.filippi@inserm.fr](mailto:caroline.filippi@inserm.fr), Bourbonlou R email:

17 [romain.bourboulou@inserm.fr](mailto:romain.bourboulou@inserm.fr), Epsztein J email: [jerome.epsztein@inserm.fr](mailto:jerome.epsztein@inserm.fr)

18 <sup>3</sup> Mitchell Center for Neurodegenerative Diseases, University of Texas Medical Branch, Galveston,

19 TX, USA. <sup>4</sup> Department of Neurology, Neuroscience and Cell Biology, University of Texas Medical

20 Branch, Galveston, TX, USA. Sengupta U email: [ursengup@utmb.edu](mailto:ursengup@utmb.edu), Kayed R email:

21 [rakayed@utmb.edu](mailto:rakayed@utmb.edu)

22

23 \*To whom correspondence should be addressed:

24 Eduardo J. Fernández-Pérez, PhD and Luis G. Aguayo, PhD, Department of Physiology,

25 Universidad de Concepción, P. O. Box 160-C, Concepción, Chile. Tel.: 56-41-203380; Fax: 56-41-

26 245975; email: [edfernandez@udec.cl](mailto:edfernandez@udec.cl) and [laguayo@udec.cl](mailto:laguayo@udec.cl)

27

28

29           **1. Supplementary Methods**

30

31    1.1.    **Preparation of A $\beta$  oligomers.** Briefly, A $\beta$  was dissolved in 1,1,1,3,3,3-Hexafluoro-2-  
32    propanol (HFIP) (10 mg/mL) (Merck Millipore, USA) and incubated in a parafilm sealed tube at  
33    37°C for 2 hours. Then, the solution was incubated at 4°C for 20 min and aliquots of 5  $\mu$ L were  
34    placed in 1.5 mL open lid Eppendorf tubes to allow evaporation. Aliquots were stored at -20°C. To  
35    obtain an oligomer-rich solution, nanopure water was added to obtain a final concentration of 80  
36     $\mu$ M and the tubes were incubated at room temperature for 20 minutes. Subsequently, a Teflon-  
37    coated magnetic stir bar was added to the solution (size: 2x5 mm) and stirred at room temperature  
38    (typically 21°C) at 500 rpm for 24 hrs. This solution was used to perform the experiments. To  
39    characterize the presence of oligomeric A $\beta$  in the preparations used in all the experiments, we used  
40    transmission electron microscopy coupled to immunogold staining that showed the presence of  
41    spherical or disc-shaped structures of A $\beta$  ranging in sizes from 5-25 nm approximately  
42    (supplementary Fig. S2C).

43

44    1.2.    **Western Blot.** Human brain-derived A $\beta$ <sub>0</sub> was characterized by Western blot analysis. Two  
45    different concentrations of A $\beta$ <sub>0</sub> (1 and 0.5  $\mu$ g of protein) were loaded onto precast NuPAGE 4-12%  
46    Bis-Tris gel (Invitrogen) for SDS-PAGE analysis. Gel was subsequently transferred onto  
47    nitrocellulose membranes and blocked with 10% nonfat dry milk at 4°C overnight. The membrane  
48    was then probed with primary antibodies, A11 (1:1000) and 6E10 (1:6000, BioLegend, USA) diluted  
49    in 5% nonfat dry milk for 1 h at RT. HRP-conjugated anti-rabbit IgG and anti-mouse IgG (1:6000,  
50    GE Healthcare, USA) were used to detect A11 and 6E10 immunoreactivity, respectively. ECL plus  
51    (GE Healthcare, USA) was used to visualize the bands.

52

53    1.3.    **Atomic force microscopy.** Human brain-derived A $\beta$ <sub>0</sub> was also analyzed by AFM using a  
54    non-contact tapping method with a Multimode 8 AFM machine (Bruker, USA). Briefly, 3-4  $\mu$ L of A $\beta$ <sub>0</sub>  
55    was applied onto a fresh-cleaved mica surface and allowed to adsorb at RT overnight. Mica was  
56    then washed with 200  $\mu$ L of deionized water, air-dried and imaged.

57

58 1.4. **Immunogold and negative contrast transmission electron microscopy.** Five  
59 microliters of A $\beta$ <sub>0</sub>, at a concentration of 50  $\mu$ M, were applied to carbon-coated Formvar grids (Agar  
60 Scientific, UK). Nonspecific immunoreactivity was blocked with 3% bovine serum albumin (BSA)  
61 for 30 minutes at room temperature and incubated with the primary antibody anti-A $\beta$  6E10 (1:50;  
62 Novus Biologicals, USA) for 1 hour. A secondary 5-nm gold-conjugated anti-mouse IgG antibody  
63 (Merck, Germany) was used at a 1:20 dilution for 30 minutes. Samples were fixed with a 2%  
64 glutaraldehyde solution for 5 minutes. A $\beta$ <sub>0</sub> were stained with 5  $\mu$ L of 0.2 % (wt/vol) phosphotungstic  
65 acid and the grid was air-dried. Samples were examined using a JEOL 1200 EX II electronic  
66 microscope.

67

68 1.5. **Voltage-clamp experiments *in vitro* and *ex vivo*.** To isolate the AMPAergic miniature  
69 currents (mEPSCs) *in vivo* and *ex vivo*, synaptic transmission inhibitors were applied using a  
70 perfusion system (in  $\mu$ M): 20 DAPV (2-amino-5- phosphonopentanoate), 1 strychnine and 10  
71 bicuculline. The same approach was used to isolate GABAergic miniature currents (mEPSCs) *in*  
72 *vivo* and *ex vivo*, perfusing (in  $\mu$ M): 20 DAPV, 1 strychnine and 20 CNQX (6-Cyano-7-  
73 nitroquinoxaline-2,3-dione). All synaptic transmission inhibitors were purchased from Tocris, USA.  
74 For recordings of synaptic currents in CA1 hippocampal brain slices (*ex vivo*), the rats were sedated  
75 with isoflurane and decapitated. The brain was removed and coronal hippocampal cuts of 300-400  
76  $\mu$ m thick were made in a VT1200S vibratom (Leica, Germany) in a cold solution containing (in mM):  
77 194 Sucrose, 30 NaCl, 4.5 KCl, 1 MgCl<sub>2</sub>, 26 NaHCO<sub>3</sub>, 1.2 NaH<sub>2</sub>PO<sub>4</sub> and 10 Glucose. Once the  
78 slices were obtained, they were allowed to stand in a chamber at room temperature (22 ° C) for 1  
79 hour in artificial cerebrospinal fluid (aCSF) bubbling with 95% O<sub>2</sub> and 5% CO<sub>2</sub>. The aCSF solution  
80 contained (in mM): 120 NaCl, 3 KCl, 2 MgSO<sub>4</sub>, 2.5 CaCl<sub>2</sub>, 1 NaH<sub>2</sub>PO<sub>4</sub>, 25 NaHCO<sub>3</sub> and 20 glucose.  
81 The slices were then transferred to the recording chamber with aCSF solution saturated with 95%  
82 O<sub>2</sub> and 5% CO<sub>2</sub> and continuously perfused with oxygenated aCSF at a rate of ~2 ml/min at room  
83 temperature (RT). Whole-cell voltage and current clamp recordings were made using an Axopatch  
84 200B amplifier (Axon Instruments, USA) and Digidata 1322A (Molecular Devices, USA). All

85 recordings were filtered at 2.2 kHz and digitized at 10 kHz. Data were acquired using Clampex 10  
86 software (Molecular Devices, USA). Series resistance was continuously monitored and only cells  
87 with a stable access resistance were included for data analysis.

88

89 **1.6. Current-clamp recordings *in vivo*.** On the day of the recordings, the animals were  
90 anesthetized (induction: 3% isoflurane; maintenance: Xylazine/Ketamine 10/100 mg/Kg,  
91 supplemented with ketamine 20 mg/Kg). The level of anesthesia was assessed by pinching the  
92 foot and by measuring body temperature and respiratory rate. Body temperature was maintained  
93 at 37 °C with a thermal blanket (FHC). The animals were fixed in a stereotactic apparatus (SR-6,  
94 Narishige, Japan). A local analgesic (lidocaine) was applied as a gel on the stereotaxic system bars  
95 to reduce pain during fixation of the head with the stereotaxic system bars, and it was also injected  
96 as a liquid under the skin before the first incision. An ophthalmic gel was applied to the eyes to  
97 prevent them from drying out during surgery, and the eyes were covered with a piece of cardboard  
98 to protect them from light during surgery. The skull was exposed and two small craniotomies (2 mm  
99 in diameter) were perforated on both hippocampus (-3.5 mm posterior to bregma; 2.5 mm lateral  
100 to bregma) to record in the CA1 area (3 mm deep from the surface of the brain). The Vm of CA1  
101 neurons was recorded in the current clamp mode, using standard techniques for "blind patch" blind  
102 cell clamp *in vivo* (99). Before starting the recording of evoked action potentials, a small holding  
103 current was applied to stabilize the resting membrane potential (RMP) to -70 mV. The borosilicate  
104 electrodes that were used had a resistance of 5-7 MΩ. The internal solution contained (in mM): 135  
105 K-Gluconate, 5.4 KCl, 10 HEPES, 2 Mg-ATP, 0.4 GTP, 0.2 EGTA and 0.2% of biocytin (pH 7.2,  
106 adjusted with KOH). The Vm was amplified by an NPI ELC-03XS amplifier (NPI Electronics,  
107 Germany) and digitized with a LIH (HEKA Elektronik, Germany), using Patch Master software  
108 (HEKA Elektronik, Germany). Finally, output signals were digitized 1440A Digidata (Molecular  
109 Devices, USA) and recorded with Axoscope software (Molecular Devices, USA). 50 Hz noise was  
110 removed using a HumBug noise eliminator (Quest Scientific, Canada). For further analysis, only  
111 cells with Vm at rest under -55 mV were considered.

112

113 1.7. **Histology.** Animals were injected with a ketamine overdose and transcardially perfused  
114 with 1x PBS solution followed by 4% paraformaldehyde fixation. The brains were then left in 4%  
115 PFA overnight at 4°C, before washing and storing at 4°C in PBS. The next day, 50 µm thick coronal  
116 slices were *post hoc* processed with the streptavidin method associated with the Cy3 fluorophore  
117 (Jackson ImmunoResearch, USA) to visualize neurons containing biocytin. For this, brain slices  
118 were incubated with PBS containing 0.3% Triton X-100 (Sigma, Germany), 2% normal goat serum  
119 (Thermo Fisher Scientific, USA) and 1:1000 Cy3™ streptavidin (Jackson ImmunoResearch, USA)  
120 for 48 - 72 hrs at 4°C (continuously agitated, and protected from light). After confirming the location  
121 of the recorded cell in the hippocampus, slices were blocked with PBST (PBS and 0.3% Triton X-  
122 100) plus 7% normal goat serum for 2 hrs at 4 °C, continuously agitated, and protected from light.  
123 Immunostaining was performed using a rabbit anti-Calbindin D-28k antibody diluted 1:1000 (Swant,  
124 Switzerland) in a solution containing: PBS, 0.3% Triton X-100, 2% normal goat serum and 1:1000  
125 Cy3™ streptavidin for 24 hrs at 4 °C (continuously agitated, and protected from light). Slices were  
126 washed with PBST (3 times per 10 min at RT, continuously agitated, and protected from light) and  
127 then incubated with a secondary Alexa Fluor® 488 Donkey Anti-Rabbit antibody diluted 1:1000  
128 (Jackson ImmunoResearch, USA) using the same protocol and solution of the primary antibody.  
129 After washing with PBST (3 times per 10 min at RT, continuously agitated, and protected from light)  
130 and PBS (2 times per 10 min at RT, continuously agitated, and protected from light), samples were  
131 mounted with Vectashield mounting medium (Vectorlabs, USA). 8 bit images were obtained using  
132 a confocal upright Leica TCS SP5 X microscope (Leica, Germany) with a 40x oil immersion  
133 objective (1.3 NA) and under the following conditions: for excitation we used 2 laser lines (488 nm,  
134 555 nm) and emission was collected in the 490-540 nm and 569-610 nm ranges, respectively  
135 (example in Fig. 8).

136

137 1.8. **Simultaneous recordings of electrophysiology and fluorescence.** Hippocampal  
138 neurons were incubated with the NO probe DAQ (1,2-aminoanthraquinone) (Sigma, Germany) at  
139 a concentration of 2.5 mg/mL for 20 min at 37°C (100, 101). The neurons were washed 3 times  
140 with NES and mounted in a well on an inverted microscope (TE200U, Nikon, USA) equipped with

141 a 16-bit IonXEM CCD camera (Andor, Japan), a 20X/0.4 NA objective (Nikon, Japan) and a  
142 voltage-clamp configuration for *in vitro* studies. The fluorescent signal for the DAQ probe was  
143 obtained by exciting with a bandpass filter (528-553 nm) and collecting the fluorescence with a  
144 bandwidth emission filter (590-650 nm) (Nikon, USA). Image acquisition was performed with a  
145 computer-controlled Lambda 10-B shutter (Sutter Instruments, USA) using Imaging Workbench 5.0  
146 software (INDEC BioSystems, USA) and exciting for a period of 900 ms at intervals of 1 s during a  
147 continuous period of 20 min. Some experiments involved the use of other molecules: L-NAME (NO  
148 synthase inhibitor) (Sigma, Germany), 1400W (iNOS inhibitor) (Tocris, USA), SNAP (NO donor)  
149 (Sigma, Germany) and CPTIO (NO sequester molecule) (Cayman Chemical, USA). Fresh stocks  
150 of all of these reagents were prepared on the same day that the experiment was performed.

151

152 1.9. **Data analysis.** Synaptic currents parameters (frequency and amplitude) were analyzed  
153 using Mini analysis software (Synaptosoft, Inc., USA), which identifies the currents based on  
154 several criteria such as the amplitude the area under the curve and the decay time of each event.  
155 As a routine check, we visually inspect all events detected by the software and reject any that did  
156 not exhibit the general expected form for synaptic events. Background noise was measured from  
157 sections devoid of synaptic events, which oscillated at ~ 2 pA. This value multiplied by 5 (10 pA)  
158 was used as a threshold to detect synaptic currents. For spontaneous synaptic recordings, the area  
159 under the current trace was integrated (pA · ms) and expressed as charge transferred (nC) during  
160 the whole recording (2 minutes) using Clampfit 10.5 (Molecular Devices, USA). For the I/E balance  
161 experiments (Fig.3), the analysis was similar, but the baseline current was not included in the  
162 analysis. AP parameters were calculated in the first spike of the response as follows: threshold was  
163 numerically estimated from first derivative in a  $V'$  versus  $V$  phase space projection. From this value,  
164 amplitude was calculated to the maximum value reach by the AP. Finally, we obtained the half  
165 width of the AP peak expressed as duration. Input resistance was obtained from the slopes in  $V/I$   
166 curves in hyperpolarizing current steps. Rheobase was extrapolated from spikes vs. injected  
167 current curves using Origin 2019b (Origin Lab, USA). Spontaneous spike firing frequency was  
168 obtained using pClamp10 software (Molecular Devices, USA).

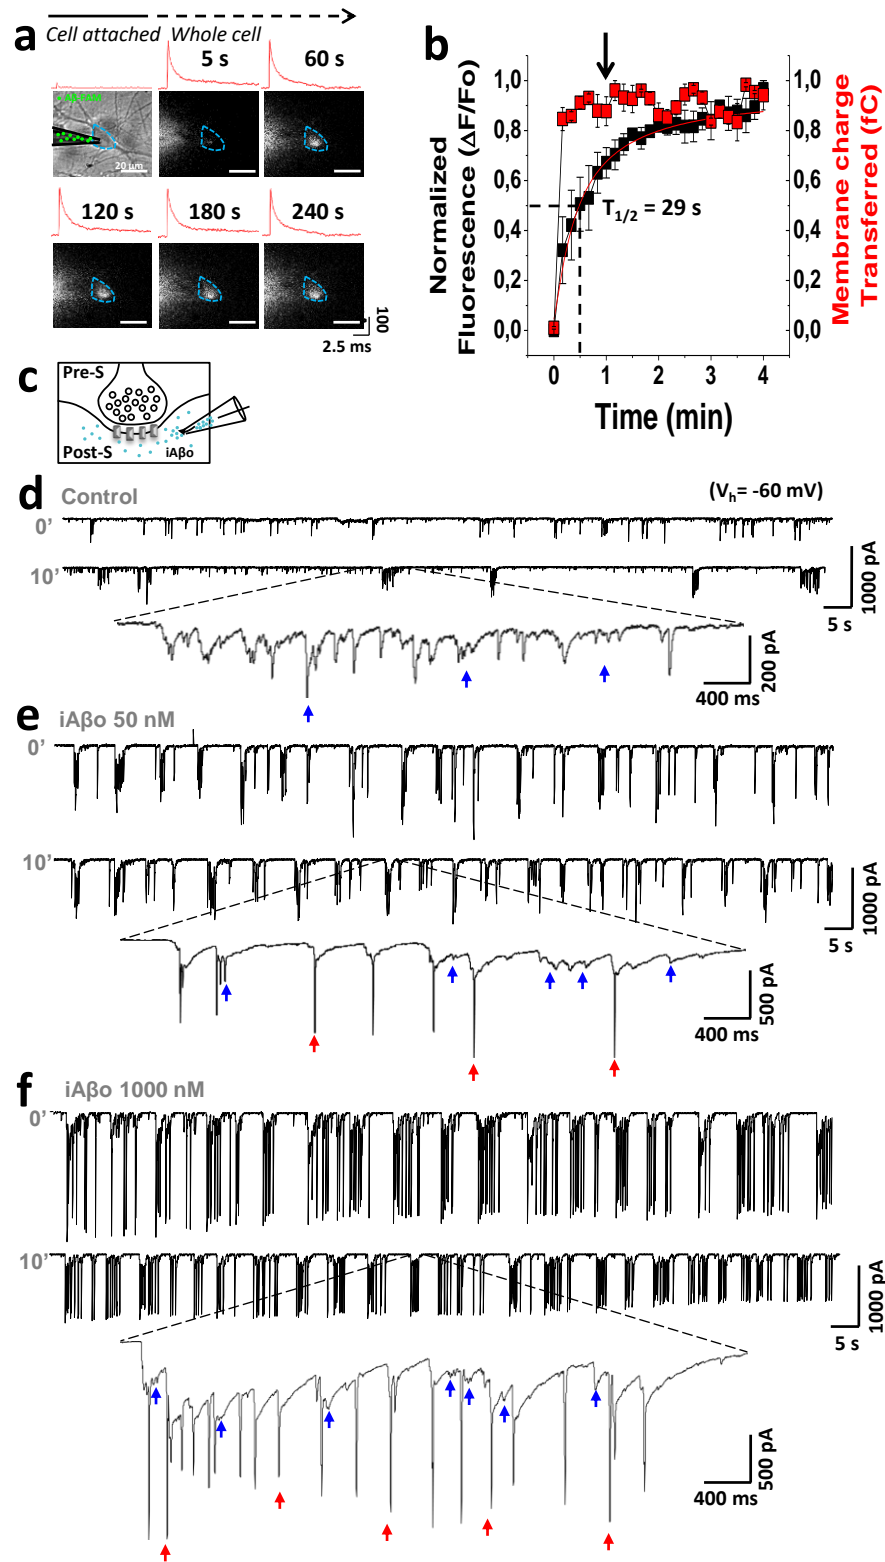

172 **Supplementary Figure 1. The whole cell technique allows rapid entry of fluorescent A $\beta$ o into**  
173 **the intraneuronal compartment. a,** Simultaneous registration of patch clamp and fluorescence  
174 showing the entry of fluorescently labeled A $\beta$ o (in green) from inside the recording electrode to the  
175 intracellular medium. The region of interest (ROI) in (in light blue) delimits the contour of the  
176 recorded neuron. Fluorescence quantification was carried out within this region and it was observed  
177 that it increases inside the cell throughout the experiment (0-4 min). Along with this, the traces of  
178 the capacitive currents recorded at different intervals (in red) are observed. **b,** Quantification of the  
179 fluorescence in the ROI previously described, together with the membrane charge transferred. The  
180 latter reflects that the solution contained in the patch pipette instantly reaches the intracellular  
181 compartment, while the fluorescence accounts for a gradual entry of the peptide, reaching 50% of  
182 the total fluorescence value at 29 s ( $T_{1/2}$ ). The black arrow indicates the time at which synaptic  
183 currents began to be recorded. **c,** Schematic representation of the synaptic recording, showing the  
184 pre-synaptic (Pre-S) and post-synaptic (Post-S) compartment, and the application of iA $\beta$ o in the  
185 latter using the patch electrode (orange squares represent post-synaptic receptors). **d, e, f,** Total  
186 synaptic recordings obtained at the beginning (time = 0') and end of the experiment (time = 10'),  
187 demonstrating a rapid and marked increase in the frequency and amplitude of synaptic currents as  
188 the concentration of intracellular iA $\beta$ o oligomers (iA $\beta$ o) increases from 50 nM (**e**) to 1000 nM (**f**) ( $V_h$   
189 = -60 mV). Bursts of synaptic currents (arrows in blue) and spikes in current-recording mode are  
190 observed in red, which increase as the concentration of iA $\beta$ o in the recording electrode augmented.  
191 Line charts represent the average  $\pm$  SEM. n = 18 cells per condition.

192

193

194

195

196

197

198

199



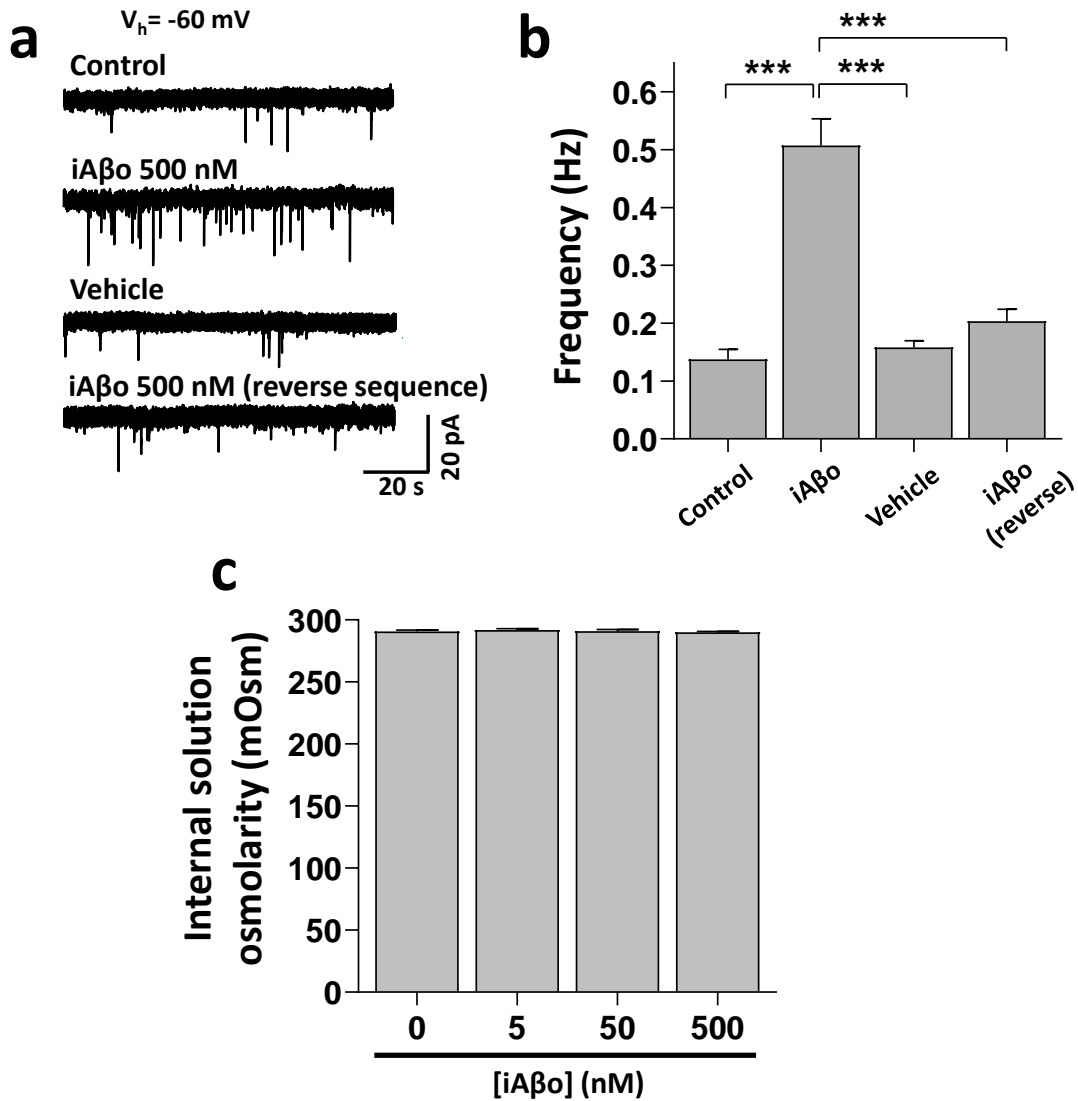

201

202 **Supplementary Figure 2. Reverse iA $\beta$ o do not have an effect on frequency of miniature post-**

203 **synaptic currents *in vitro*. a, b, Representative mPSCs traces (a) and frequency quantification**

204 **(b) of iA $\beta$ o, reverse sequence and vehicle controls (One-Way Welch's ANOVA with Games-Howell**

205 **post-hoc test for:  $F(3,16.79)=18.78$ ,  $p=1.30E-5$ . p-values for post-hoc test: control vs. iA $\beta$ o 500 nM:**

206 **1.07E-4, iA $\beta$ o vs. vehicle: 2.49E-4 and iA $\beta$ o vs. iA $\beta$ o reverse: 4.97E-4). c, Internal solution**

207 **osmolarity measurements show no change when adding different concentrations of iA $\beta$ o. Bar**

208 **charts represent the average  $\pm$  SEM for control (n=9), iA $\beta$ o (n=9), vehicle (n=9) and iA $\beta$ o reverse**

209 **(n=9) cells. \*\*\* denotes  $p < 0.001$ .**

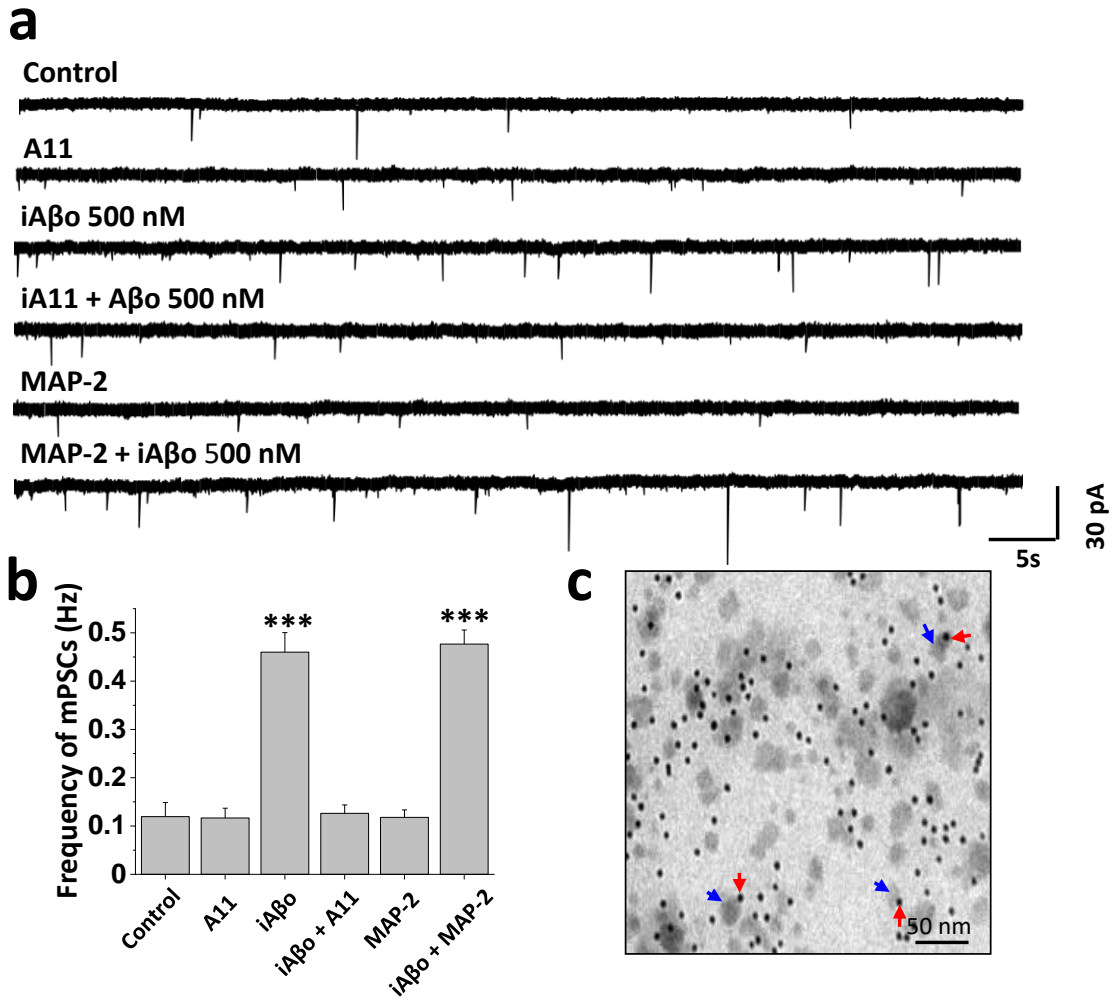

211

212 **Supplementary Figure 3. Pre-incubation with A11 antibody attenuates the intracellular**

213 **synaptic effect of iAβo on the frequency of miniature post-synaptic currents *in vitro*.** **a,**

214 **Representative traces showing the increase in the frequency of mPSCs after application of iAβo**

215 **500nM alone or pre-incubated for 10 min with antibody A11 or MAP-2. Intracellular dialysis of the**

216 **antibodies did not have an effect per se on the frequency of mPSCs ( $V_h = -60$  mV).** **b,** Quantification

217 **of the frequency of mPSCs under the conditions described in a, showing that iAβo increases the**

218 **frequency of miniature synaptic currents, but this effect is diminished to control levels in a similar**

219 **way with A-11 pre-incubation. No differences in the effect of iAβo are observed when pre-incubating**

220 **with an antibody for MAP-2 (one-way ANOVA with Tukey post-hoc:  $F(5,44)=27.436$ ,  $p=1.7E-12$ ).**

221 **c**, Electronic micrographs demonstrating the presence of amyloid oligomeric aggregates (arrows  
222 in blue) in the preparations used. Along with that, the presence of gold nanoparticles coupled to  
223 the secondary antibody used for A $\beta$  immunodetection is also observed (arrows in red). Bar charts  
224 represent the average  $\pm$  SEM for control (n=8), A11 (n=8), iA $\beta$ o (n=9), iA $\beta$ o+A11 (n=9), MAP-2  
225 (n=9) and iA $\beta$ o+MAP-2 (n=7) cells. \*\*\* denotes p <0.001.

226

227

228

229

230

231

232

233

234

235

236

237

238

239

240

241

242

243

244

245

246

247

248

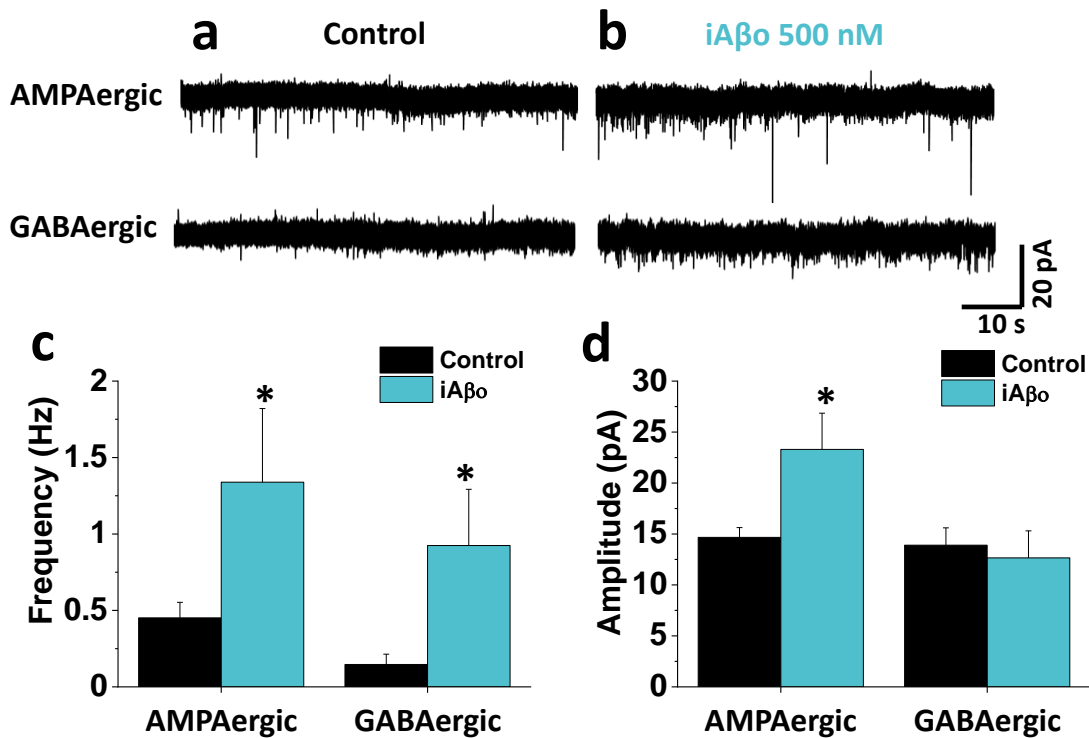

250

251 **Supplementary Figure 4. iAβo increases the frequency of AMPAergic and GABAergic**

252 **synaptic currents in CA1 hippocampal neurons ex vivo. a, b, Representative AMPA and GABA**

253 **mPSCs obtained in acute hippocampal slices for control condition and with iAβo 500 nM,**

254 **respectively ( $V_h = -60$  mV). c, Quantification of the frequency for AMPAergic (unpaired Student's t-**

255 **test with Welch's correction:  $t(6.54) = -2.306$ ,  $p = 3.39E-2$ ) and GABAergic (unpaired Student's t-test**

256 **with Welch's correction:  $t(6.40) = -2.590$ ,  $p = 1.97E-2$ ) mPSCs. d, Amplitude quantification for**

257 **AMPAergic (unpaired Student's t-test with Welch's correction:  $t(10.32) = -2.540$ ,  $p = 1.95E-2$ ) and**

258 **GABAergic (unpaired Student's t-test with Welch's correction:  $t(10.94) = 0.394$ ,  $p = 7.01E-1$ )**

259 **miniature currents. Bar charts represent the average  $\pm$  SEM for control ( $n = 12$ ) and iAβo ( $n = 7$ ) cells.**

260 \* denotes  $p < 0.05$ .

261

262

263

264

265 **Supplementary Figure 5**

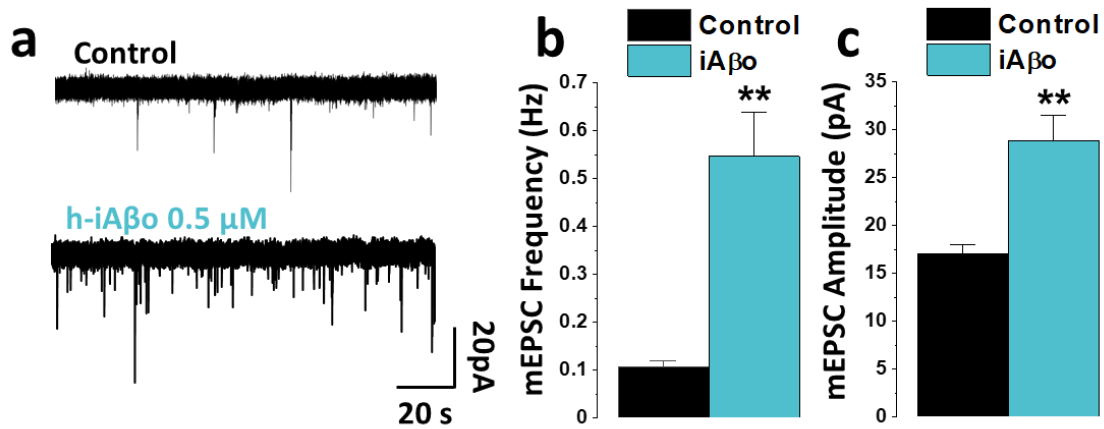

266

267 **Supplementary Figure 5. h-iAβo increased AMPA-R mediated mEPSCs *in vitro*.** a,  
268 Representative traces of AMPA mEPSCs in control condition and with intracellular application of  
269 h-iAβo 0.5 μM ( $V_h = -60$  mV). b, c, Quantification of the frequency (b) (n=7) ( $t(7.29)=-4.686$ ,  
270  $p=2.01E-3$ ) and amplitude (c) (n=8) ( $t(8.73)=-4.323$ ,  $p=2.03E-3$ ) of the AMPAergic miniature  
271 currents, demonstrating a significant increase in presence of h-iAβo. Scatter plots represent the  
272 average  $\pm$  SEM. Unpaired Student's t-test with Welch's correction for (b) and (c). \*\* denotes  $p <$   
273 0.005, \*\*\*  $p < 0.001$ .

274

275

276

277

278

279

280

281

282

283

284

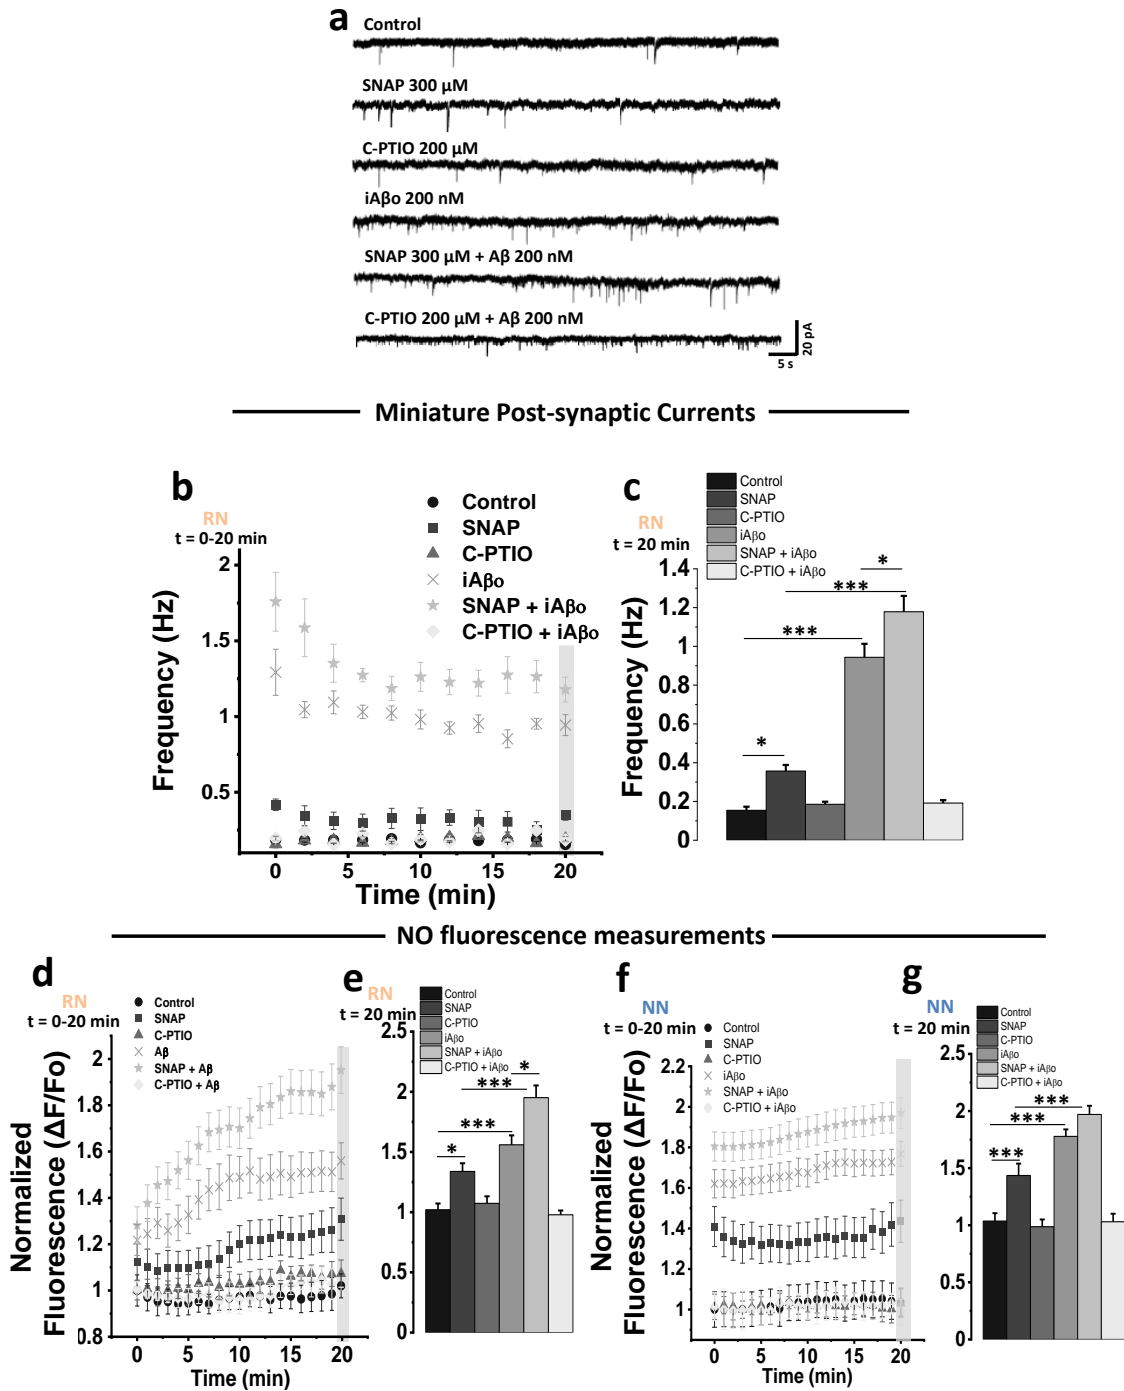

286  
 287  
 288

289 **Supplementary Figure 6. Nitric oxide is involved in the pre-synaptic retrograde signaling of**  
290 **iA $\beta$ o on the frequency of miniature synaptic currents. a, b, c,** Representative mPSCs traces  
291 obtained in absence and presence of A $\beta$  or 200 nM using a NO donor molecule (300  $\mu$ M SNAP, in  
292 gray) or NO scavenger (C-PTIO 200  $\mu$ M) ( $V_h = -60$  mV). It is observed that SNAP per se has an  
293 effect on the frequency of synaptic currents, but when co-applying iA $\beta$ o+SNAP this effect increases  
294 considerably, even exceeding the effect that iA $\beta$ o has on its own. On the contrary, the application  
295 of C-PTIO did not affect the frequency of mPSCs, but co-applied with iA $\beta$ o decreased the frequency  
296 to control levels. The bar graph in (c) represent the data recorded at time 20' obtained from graph  
297 **b. d - g,** Relative levels of NO (expressed as fluorescence) obtained throughout the course of the  
298 experiment and at 20' for RN (d and e) and NN (f and g). Bar and line charts represent the average  
299  $\pm$  SEM. Control (n=6), SNAP (n=6), C-PTIO (n=6), iA $\beta$ o (n=6), iA $\beta$ o+SNAP (n=6), iA $\beta$ o+C-PTIO  
300 (n=6) for RN and Control (n=57), SNAP (n=51), C-PTIO (n=49), iA $\beta$ o (n=56), iA $\beta$ o+SNAP (n=52),  
301 iA $\beta$ o+C-PTIO (n=53) for NN. One-way ANOVA with Games-Howell comparison for (c):  
302  $F(5,30)=89.902$ ,  $p=3.49E-23$ . p-values for post hoc test: Control vs. SNAP:  $4.09E-02$ , Control vs.  
303 iA $\beta$ o:  $3.17E-13$ , SNAP vs. SNAP + iA $\beta$ o:  $7.56E-14$  and iA $\beta$ o vs. iA $\beta$ o + SNAP:  $4.29E-2$ . One-Way  
304 Welch's ANOVA with Games-Howell post-hoc test for (e):  $F(5,30)=34.685$ ,  $p=1.34E-11$ . p-values  
305 for post hoc test: Control vs. SNAP:  $4.18E-02$ , Control vs. iA $\beta$ o:  $1.38E-4$ , SNAP vs. SNAP + iA $\beta$ o:  
306  $5.84E-7$  and iA $\beta$ o vs. iA $\beta$ o + SNAP:  $2.27E-4$ . One-Way Welch's ANOVA with Games-Howell post-  
307 hoc test for (g):  $F(5,312)=36.376$ ,  $p=2.57E-29$ . p-values for post hoc test: Control vs. SNAP:  $4.26E-$   
308  $6$ , Control vs. iA $\beta$ o:  $9.10E-13$ , SNAP vs. SNAP + iA $\beta$ o:  $2.98E-4$ . \* denotes  $p < 0.05$ , \*\*\*  $p < 0.001$ .  
309  
310  
311  
312  
313  
314  
315  
316

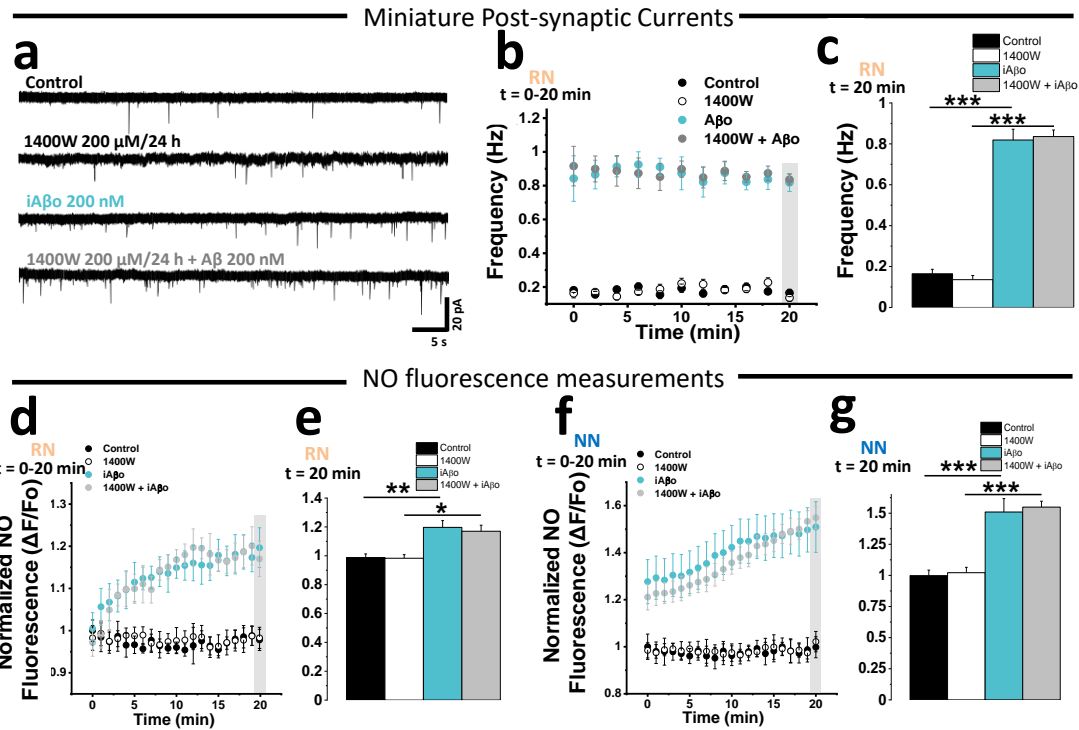

318

319

320 **Supplementary Figure 7. iNOS inhibitor does not affect iAβo actions on synaptic currents**

321 **frequency.** **a - c**, Representative recordings and quantification of the frequency of miniature post-

322 synaptic currents in absence and presence of iAβo or 200 nM, together with the co-application of

323 an iNOS inhibitor (1400W) 200 μM for 24 hours ( $V_h = -60$  mV). It is observed that 1400W *per se*

324 does not have an effect on the frequency of synaptic currents. On the other hand, by pre-incubating

325 the culture with 1400W and applying iAβo, it does not change its effect on the frequency of mPSCs.

326 The bar graph in **(c)** was obtained from the data recorded at time 20'. **d - g** NO fluorescence

327 recordings obtained from the recorded neuron (RN) **(d and e)** and from adjacent neurons (NN) **(f**

328 **and g)**. Both, RN and NN cells, exhibit an increase in NO when applying iAβo in the RN neuron.

329 This effect does not change significantly when iAβo is applied in a culture that has been pre-

330 incubated with iNOS inhibitor. Line and bar graphs represent the average  $\pm$  SEM for control (n=8),

331 1400W (n=7), iAβo (n=9) and iAβo + 1400W (n=10) for RN and control (n=78), 1400W (n=82), iAβo

332 (n=75) and iAβo + 1400W (n=79) for NN. One-Way Welch's ANOVA with Games-Howell post-hoc

333 test for **(c)**:  $F(3,30)=28.474$ ,  $p=6.50E-9$ . p-values for post hoc test: Control vs. iAβo:  $9.70E-7$ ,



334 1400W vs.  $iA\beta_0 + 1400W$ :  $3.52E-6$ . One-Way Welch's ANOVA with Games-Howell post-hoc test  
335 for (e):  $F(3,30)=9.0002$ ,  $p=2.10E-4$ . p-values for post hoc test: Control vs.  $iA\beta_0$ :  $2.41E-3$ , 1400W  
336 vs.  $iA\beta_0 + 1400W$ :  $1.02E-2$ . One-Way Welch's ANOVA with Games-Howell post-hoc test for (g):  
337  $F(3,310)=21.348$ ,  $p=1.35E-12$ . p-values for post hoc test: Control vs.  $iA\beta_0$ :  $4.99E-7$ , 1400W vs.  
338  $iA\beta_0 + 1400W$ :  $8.97E-8$ . \* denotes  $p < 0.05$ , \*\*  $p < 0.005$ , \*\*\*  $p < 0.001$ .

339

340

341

342

343

344

345

346

347

348

349

350

351

352

353

354

355

356

357

358

359

360

361

362 **Supplementary Figure 8**

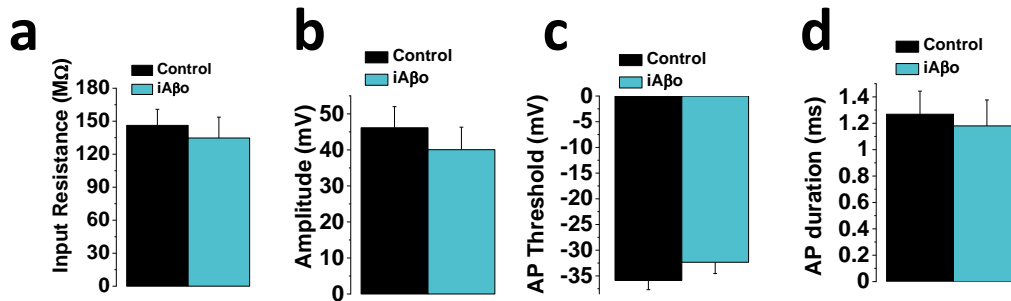

363

364 **Supplementary Figure 8. iAβo does not change intrinsic excitability membrane parameters**

365 **in hippocampal neurons *in vivo*. a – d** Quantification of input resistance and AP parameters:

366 amplitude, duration (half-width) and threshold, all of which do not show significant differences

367 between the conditions tested. Bar and line charts represent the average ± SEM for control (n=10)

368 and h-iAβo (n=6) cells of at least 6 rats.

369

370

371

372

373

374

375

376

377

378

379

380

381

382

383

384

385 **Supplementary Figure 9**

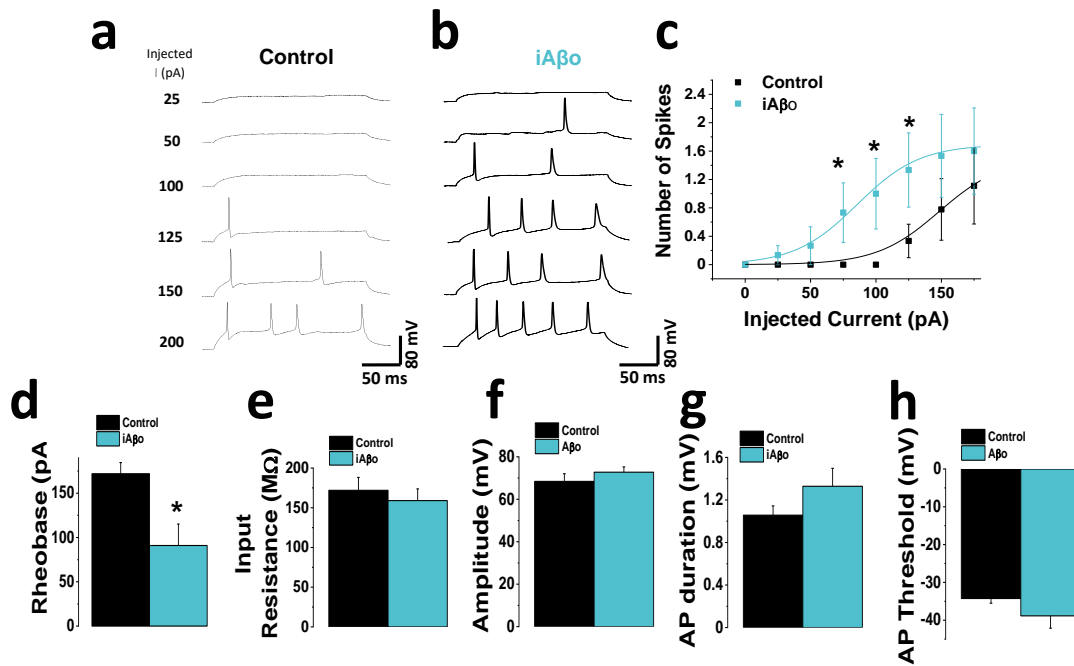

386

387 **Supplementary Figure 9. iAβo increased the firing of action potentials evoked by current**

388 **injection in hippocampal neurons *in vitro*. a, b, Hippocampal neuron action potential (AP)**

389 **recordings in the absence (a) and presence of 500 nM iAβo (b). c, Relationship between the**

390 **number of triggered AP and the injected current intensity for the experimental conditions described**

391 **previously. d, Rheobase constant decreased for iAβo condition. e – h, Quantification of input**

392 **resistance and AP parameters: amplitude, duration (half-width) and threshold, all of which do not**

393 **show significant differences between the conditions tested. Bar and line charts represent the**

394 **average ± SEM. n=12 cells per condition. \* denotes p < 0.05.**

395

396

397

398

399

400

401

402 **Supplementary Figure 10**

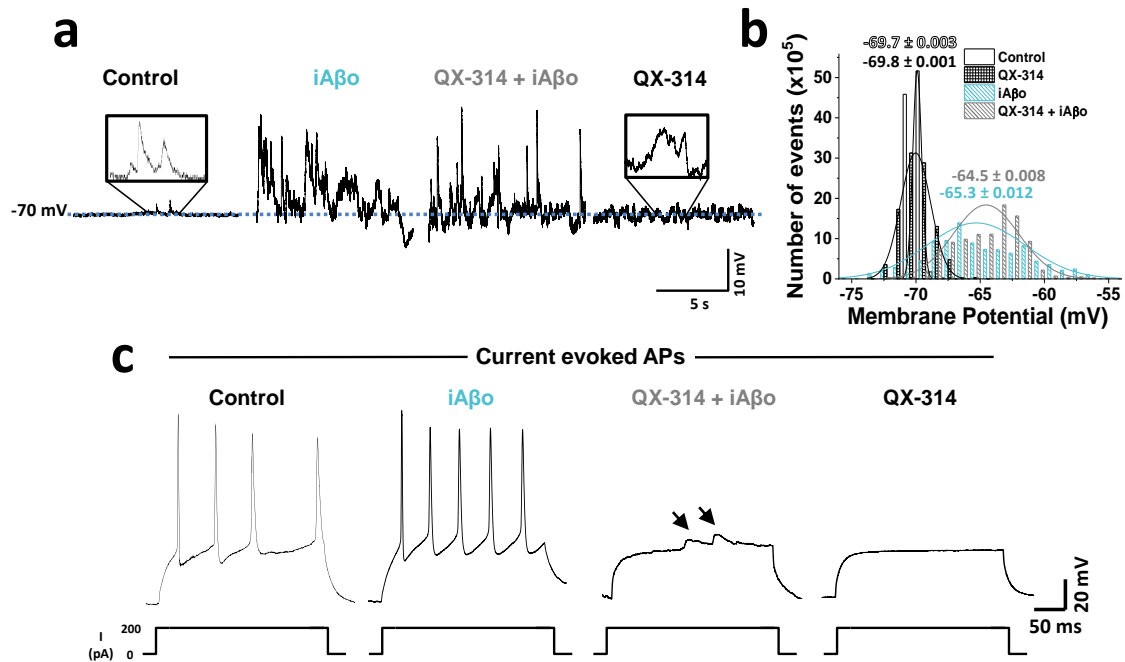

403

404 **Supplementary Figure 10. Intracellular blockade of voltage-regulated  $\text{Na}_v$  channels does not**

405 **prevent depolarization of the membrane activated by  $i\text{A}\beta\text{o}$ .** **a**, Representative recordings

406 obtained without current injection, showing membrane potential ( $V_m$ ) fluctuations under the

407 different conditions tested. Small variations in the value of  $V_m$  are observed for control condition,

408 which are exacerbated in the presence of  $i\text{A}\beta\text{o}$  500 nM, while the co-application of  $i\text{A}\beta\text{o}$  with QX-

409 314 did not diminished the intracellular effects of  $i\text{A}\beta\text{o}$  on  $V_m$  fluctuations. QX-314 by itself did not

410 show any differences with respect to control conditions. **b**, Histogram showing the distribution of

411  $V_m$  values along with average values  $\pm$  SEM in the different experimental conditions shown in A.

412 **c**, Current injection experiments demonstrating that, under the control and  $i\text{A}\beta\text{o}$  conditions, the

413 generation of action potentials was not inhibited, while  $\text{Na}_v$  intracellular block by QX-314 prevented

414 spiking of neurons with and without  $i\text{A}\beta\text{o}$ . Black arrows indicate that even when  $\text{Na}_v$  was effectively

415 blocked, depolarizing post-synaptic potentials were appreciated when  $i\text{A}\beta\text{o}$  was present. This did

416 not occurred for the condition with QX-314 alone.  $n=10$  cells per condition.

417

418

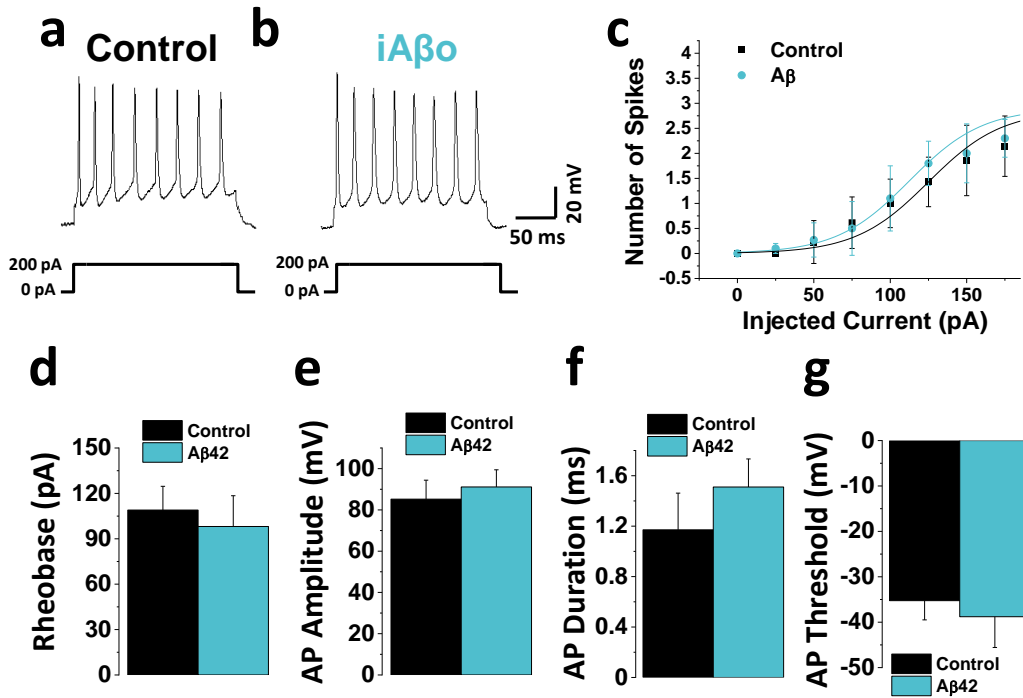

420

421 **Supplementary Figure 11. iA $\beta$ 0 did not increase the firing of action potentials in dorsal root**  
 422 **ganglion neurons (DRG) *in vitro*.** **a, b,** Representative current-evoked action potentials in the  
 423 absence (**a**) and presence of 500 nM iA $\beta$ 0 (**b**). **c,** Relationship between the number of evoked  
 424 action potentials and the injected current intensity for the experimental conditions described in **a**  
 425 and **b**. **d – g,** Quantification of the rheobase constant (**d**) and AP parameters amplitude (**e**), duration  
 426 (**f**) (expressed as half-width) and threshold (**g**) showing no statically differences between both  
 427 conditions. Bar and line charts represent the average  $\pm$  SEM. n=10 cells per condition.

428

429

430

431

432
